# Supplementary material for: The energetics of carbonated PuO2 surfaces affects nanoparticle morphology: a DFT+U study
Source: Royal Society of Chemistry journal article supplement (doi:10.1039/d0cp00021c), 2020-01-01
Supplement: d0cp00021c1.pdf [file d0cp00021c1.pdf]

## Supporting Information

### The Energetics of Carbonated PuO<sub>2</sub> Surfaces Affects Nanoparticle Morphology: A DFT+U Study

Samuel Moxon,<sup>a</sup> Adam R. Symington,<sup>b</sup> Joshua Tse,<sup>a</sup> James Dawson,<sup>a</sup> Joseph M. Flitcroft,<sup>a</sup> Stephen C. Parker,<sup>b</sup> David J. Cooke,<sup>a</sup> Robert M. Harker,<sup>c</sup> Marco Molinari<sup>a,\*</sup>

<sup>a</sup> Department of Chemistry, University of Huddersfield, Queensgate, Huddersfield, HD1 3DH, UK

<sup>b</sup> Department of Chemistry, University of Bath, Claverton Down, Bath, BA2 7AY, UK

<sup>c</sup> AWE Aldermaston, Reading, RG7 4PR, UK

\* Corresponding author: [m.molinari@hud.ac.uk](mailto:m.molinari@hud.ac.uk), [samuel.moxon@hud.ac.uk](mailto:samuel.moxon@hud.ac.uk)

## Section S1: Bulk Structures and Magnetisation - PuO<sub>2</sub> and Pu<sub>2</sub>O<sub>3</sub>

**Table S1** - The final minimised structure of the bulk 12 atom unit cell. The unit cell is given in angstrom (Å), the ionic positions are given as fractional coordinates and the initial and final magnetic vectors are presented. Oxygen atoms always have initial and final magnetics vectors of 0  $\mu_B$ . The experimental structure was from D. Taylor, *Trans. J. Br. Ceram. Soc.*, 1984, **83**, 32–37

| Unit Cell Vectors |                      |         |         |                                     |         |      |                                   |      |      |
|-------------------|----------------------|---------|---------|-------------------------------------|---------|------|-----------------------------------|------|------|
|                   |                      |         | X       | Y                                   | Z       |      |                                   |      |      |
|                   |                      |         | 5.41746 | 0.00000                             | 0.00000 |      |                                   |      |      |
|                   |                      |         | 0.00000 | 5.41746                             | 0.00000 |      |                                   |      |      |
|                   |                      |         | 0.00000 | 0.00000                             | 5.41746 |      |                                   |      |      |
| Atom              | Coordinates (Direct) |         |         | Initial Magnetic Vector ( $\mu_B$ ) |         |      | Final Magnetic Vector ( $\mu_B$ ) |      |      |
|                   | X                    | Y       | Z       | X                                   | Y       | Z    | X                                 | Y    | Z    |
| Pu A              | 0.00000              | 0.00000 | 0.00000 | 1.0                                 | 1.0     | 1.0  | 2.2                               | 2.2  | 2.2  |
| Pu B              | 0.50000              | 0.50000 | 0.00000 | -1.0                                | -1.0    | 1.0  | -2.2                              | -2.2 | 2.2  |
| Pu C              | 0.50000              | 0.00000 | 0.50000 | -1.0                                | 1.0     | -1.0 | -2.2                              | 2.2  | -2.2 |
| Pu D              | 0.00000              | 0.50000 | 0.50000 | 1.0                                 | -1.0    | -1.0 | 2.2                               | -2.2 | -2.2 |
| O                 | 0.25000              | 0.25000 | 0.25000 |                                     |         |      |                                   |      |      |
| O                 | 0.25000              | 0.25000 | 0.75000 |                                     |         |      |                                   |      |      |
| O                 | 0.25000              | 0.75000 | 0.25000 |                                     |         |      |                                   |      |      |
| O                 | 0.25000              | 0.75000 | 0.75000 |                                     |         |      |                                   |      |      |
| O                 | 0.75000              | 0.75000 | 0.75000 |                                     |         |      |                                   |      |      |
| O                 | 0.75000              | 0.75000 | 0.25000 |                                     |         |      |                                   |      |      |
| O                 | 0.75000              | 0.25000 | 0.75000 |                                     |         |      |                                   |      |      |
| O                 | 0.75000              | 0.25000 | 0.25000 |                                     |         |      |                                   |      |      |

**Table S2** - The final structure and magnetisation of bulk  $\text{Pu}_2\text{O}_3$ . The unit cell is given in angstrom ( $\text{\AA}$ ), the ionic positions are given as fractional coordinates and the initial and final magnetic vectors are presented. Oxygen atoms always have initial and final magnetics vectors of  $0 \mu_B$ . The experimental structure was obtained from T. D. Chikalla, C. E. McNeilly and R. E. Skavdahl, J. Nucl. Mater., 1964, 12, 131–141.

| Unit Cell Vectors |                      |          |          |                                     |       |       |                                   |       |       |
|-------------------|----------------------|----------|----------|-------------------------------------|-------|-------|-----------------------------------|-------|-------|
|                   | 11.08920             | 0.00000  | 0.00000  |                                     |       |       |                                   |       |       |
|                   | 0.00000              | 11.08929 | 0.00000  |                                     |       |       |                                   |       |       |
|                   | 0.00000              | 0.00000  | 11.08903 |                                     |       |       |                                   |       |       |
| Atom              | Coordinates (Direct) |          |          | Initial Magnetic Vector ( $\mu_B$ ) |       |       | Final Magnetic Vector ( $\mu_B$ ) |       |       |
|                   | X                    | Y        | Z        | X                                   | Y     | Z     | X                                 | Y     | Z     |
| Pu A              | 0.00004              | 0.00000  | 0.99991  | 1.00                                | 1.00  | 1.00  | 2.77                              | 2.79  | 2.78  |
| Pu A              | 0.00005              | 0.00005  | 0.49998  | 1.00                                | 1.00  | 1.00  | -2.81                             | 2.77  | 2.76  |
| Pu A              | 0.00001              | 0.49997  | 0.00018  | 1.00                                | 1.00  | 1.00  | 2.79                              | 2.79  | -2.76 |
| Pu A              | 0.50003              | 0.99993  | 0.99990  | 1.00                                | 1.00  | 1.00  | 2.76                              | -2.79 | 2.80  |
| Pu A              | 0.49999              | 0.49998  | 0.00007  | 1.00                                | 1.00  | 1.00  | -2.74                             | 2.82  | 2.78  |
| Pu A              | 0.49994              | 0.99996  | 0.49996  | 1.00                                | 1.00  | 1.00  | 2.79                              | 2.76  | -2.80 |
| Pu A              | 0.99982              | 0.50004  | 0.50011  | 1.00                                | 1.00  | 1.00  | 2.79                              | -2.80 | 2.76  |
| Pu A              | 0.49996              | 0.50002  | 0.49995  | 1.00                                | 1.00  | 1.00  | 2.80                              | 2.77  | 2.78  |
| Pu B              | 0.27814              | 0.00006  | 0.25003  | -1.00                               | -1.00 | 1.00  | -4.80                             | 0.13  | -0.19 |
| Pu B              | 0.74996              | 0.27818  | 0.50010  | -1.00                               | -1.00 | 1.00  | 0.22                              | -4.79 | 0.34  |
| Pu B              | 0.25007              | 0.77814  | 0.00004  | -1.00                               | -1.00 | 1.00  | 0.27                              | -4.78 | 0.42  |
| Pu B              | 0.74996              | 0.72185  | 0.00008  | -1.00                               | -1.00 | 1.00  | -0.22                             | -4.78 | 0.41  |
| Pu B              | 0.50002              | 0.75007  | 0.27811  | -1.00                               | -1.00 | 1.00  | -0.14                             | -0.13 | 4.80  |
| Pu B              | 0.00007              | 0.25004  | 0.77815  | -1.00                               | -1.00 | 1.00  | -0.31                             | -0.28 | 4.79  |
| Pu B              | 0.99997              | 0.75004  | 0.72191  | -1.00                               | -1.00 | 1.00  | 0.11                              | 0.08  | 4.81  |
| Pu B              | 0.27812              | 0.49998  | 0.75000  | -1.00                               | -1.00 | 1.00  | -4.80                             | -0.17 | -0.11 |
| Pu C              | 0.77821              | 0.00012  | 0.24991  | -1.00                               | 1.00  | -1.00 | -4.81                             | 0.06  | -0.08 |
| Pu C              | 0.72185              | 0.99989  | 0.74986  | -1.00                               | 1.00  | -1.00 | -4.80                             | 0.13  | 0.04  |
| Pu C              | 0.24995              | 0.72186  | 0.49995  | -1.00                               | 1.00  | -1.00 | -0.26                             | 4.79  | -0.31 |
| Pu C              | 0.75001              | 0.22186  | 0.99986  | -1.00                               | 1.00  | -1.00 | -0.16                             | 4.80  | -0.26 |
| Pu C              | 0.25007              | 0.27813  | 0.00004  | -1.00                               | 1.00  | -1.00 | 0.14                              | 4.80  | -0.23 |
| Pu C              | 0.50000              | 0.24993  | 0.72179  | -1.00                               | 1.00  | -1.00 | 0.04                              | 0.16  | -4.80 |
| Pu C              | 0.00004              | 0.75001  | 0.22186  | -1.00                               | 1.00  | -1.00 | -0.11                             | -0.05 | -4.80 |
| Pu C              | 0.99993              | 0.25006  | 0.27817  | -1.00                               | 1.00  | -1.00 | -0.18                             | 0.15  | -4.80 |
| Pu D              | 0.72184              | 0.49997  | 0.25003  | 1.00                                | -1.00 | -1.00 | 4.81                              | -0.09 | -0.02 |
| Pu D              | 0.22189              | 0.99994  | 0.74999  | 1.00                                | -1.00 | -1.00 | 4.81                              | 0.04  | 0.09  |
| Pu D              | 0.24993              | 0.22191  | 0.50000  | 1.00                                | -1.00 | -1.00 | -0.02                             | -4.81 | -0.05 |
| Pu D              | 0.50002              | 0.24989  | 0.22183  | 1.00                                | -1.00 | -1.00 | 0.14                              | 0.01  | -4.80 |
| Pu D              | 0.22183              | 0.49996  | 0.25009  | 1.00                                | -1.00 | -1.00 | 4.79                              | -0.28 | 0.23  |
| Pu D              | 0.75003              | 0.77818  | 0.49994  | 1.00                                | -1.00 | -1.00 | 0.36                              | -4.78 | -0.37 |
| Pu D              | 0.50003              | 0.74997  | 0.77811  | 1.00                                | -1.00 | -1.00 | 0.44                              | -0.27 | -4.78 |
| Pu D              | 0.77811              | 0.50000  | 0.75014  | 1.00                                | -1.00 | -1.00 | 4.80                              | 0.09  | -0.16 |
| O                 | 0.14061              | 0.12761  | 0.89722  |                                     |       |       |                                   |       |       |
| O                 | 0.10271              | 0.14038  | 0.62759  |                                     |       |       |                                   |       |       |
| O                 | 0.89720              | 0.64033  | 0.87248  |                                     |       |       |                                   |       |       |
| O                 | 0.39724              | 0.85973  | 0.12760  |                                     |       |       |                                   |       |       |

|   |         |         |         |
|---|---------|---------|---------|
| O | 0.10277 | 0.85943 | 0.87242 |
| O | 0.62761 | 0.10278 | 0.14028 |
| O | 0.87246 | 0.89726 | 0.64027 |
| O | 0.12762 | 0.39727 | 0.85975 |
| O | 0.87238 | 0.10274 | 0.85928 |
| O | 0.14055 | 0.62764 | 0.10280 |
| O | 0.64040 | 0.87226 | 0.89719 |
| O | 0.85949 | 0.12775 | 0.39715 |
| O | 0.85958 | 0.87244 | 0.10273 |
| O | 0.89730 | 0.85970 | 0.37237 |
| O | 0.10287 | 0.35951 | 0.12777 |
| O | 0.60286 | 0.14032 | 0.87230 |
| O | 0.89729 | 0.14048 | 0.12750 |
| O | 0.37251 | 0.89722 | 0.85943 |
| O | 0.12759 | 0.10282 | 0.35951 |
| O | 0.87245 | 0.60276 | 0.14062 |
| O | 0.12769 | 0.89723 | 0.14042 |
| O | 0.85979 | 0.37239 | 0.89737 |
| O | 0.35973 | 0.12760 | 0.10279 |
| O | 0.14047 | 0.87234 | 0.60282 |
| O | 0.60265 | 0.64049 | 0.12762 |
| O | 0.39719 | 0.14048 | 0.37239 |
| O | 0.89716 | 0.35954 | 0.62774 |
| O | 0.60276 | 0.35945 | 0.37239 |
| O | 0.12751 | 0.60282 | 0.64043 |
| O | 0.37237 | 0.39716 | 0.14042 |
| O | 0.62768 | 0.89727 | 0.35950 |
| O | 0.37234 | 0.60282 | 0.35933 |
| O | 0.64034 | 0.12754 | 0.60271 |
| O | 0.14018 | 0.37241 | 0.39737 |
| O | 0.35949 | 0.62754 | 0.89715 |
| O | 0.35955 | 0.37243 | 0.60271 |
| O | 0.39730 | 0.35946 | 0.87234 |
| O | 0.60275 | 0.85949 | 0.62758 |

## Section S2: Surface Structure and Magnetisation - Stoichiometric and Reduced Slabs

**Table S3** - The simulation cell dimensions for the {100}, {110} and {111} slabs.

| Slab      |         |         |           |         |          |           |         |          |
|-----------|---------|---------|-----------|---------|----------|-----------|---------|----------|
| 100       |         |         | 110       |         |          | 111       |         |          |
| X         | Y       | Z       | X         | Y       | Z        | X         | Y       | Z        |
| Unit Cell |         |         | Unit Cell |         |          | Unit Cell |         |          |
| 0.00000   | 7.66144 | 0.00000 | 10.83492  | 0.00000 | 0.00000  | 7.66144   | 0.00000 | 0.00000  |
| 0.00000   | 0.00000 | 7.66144 | 0.00000   | 7.66144 | 0.00000  | 3.83072   | 6.63501 | 0.00000  |
| 40.00000  | 0.00000 | 0.00000 | 0.00000   | 0.00000 | 33.40753 | 0.00000   | 0.00000 | 34.07497 |

**Table S4** - The initial magnetisation of the plutonium atoms in the {100}, {110} and {111} PuO<sub>2</sub> slabs. Oxygen atoms always have initial and final magnetics vectors of 0  $\mu_B$ .

| Slab | Plutonium Atom | Initial Magnetisation |       |       |
|------|----------------|-----------------------|-------|-------|
|      |                | X                     | Y     | Z     |
| 100  | Pu A           | 2.20                  | 3.10  | 0.00  |
|      | Pu B           | 2.20                  | -3.10 | 0.00  |
|      | Pu C           | -2.20                 | 0.00  | -3.10 |
|      | Pu D           | 2.20                  | 0.00  | -3.10 |
| 110  | Pu A           | -1.90                 | -3.28 | 0.00  |
|      | Pu B           | 1.90                  | 0.00  | 3.28  |
|      | Pu C           | 1.90                  | 0.00  | -3.28 |
|      | Pu D           | -1.90                 | 3.28  | 0.00  |
| 111  | Pu A           | -3.10                 | -1.79 | -1.26 |
|      | Pu B           | 0.00                  | 3.58  | -1.26 |
|      | Pu C           | 3.10                  | -1.79 | -1.26 |
|      | Pu D           | 0.00                  | 0.00  | 3.79  |

**Table S5** - The final minimised structure of the stoichiometric 3K AFM {100} configuration using PBEsol + U. The ionic positions are given as fractional coordinates and the magnetic vectors are presented.

| Atom | Coordinates (Direct) |         |         | Magnetic Vector ( $\mu_B$ ) |       |       |
|------|----------------------|---------|---------|-----------------------------|-------|-------|
|      | X                    | Y       | Z       | X                           | Y     | Z     |
| Pu A | 0.00029              | 0.99992 | 0.08299 | 3.74                        | 0.78  | 0.02  |
| Pu A | 0.50029              | 0.49992 | 0.08299 | 3.74                        | 0.78  | 0.02  |
| Pu A | 0.00008              | 0.00002 | 0.21925 | 2.18                        | 3.11  | 0.08  |
| Pu A | 0.50008              | 0.50002 | 0.21925 | 2.18                        | 3.11  | 0.08  |
| Pu A | 0.99992              | 0.99998 | 0.35478 | 2.18                        | 3.11  | 0.08  |
| Pu A | 0.49992              | 0.49998 | 0.35478 | 2.18                        | 3.11  | 0.08  |
| Pu A | 0.99971              | 0.00008 | 0.49104 | 3.74                        | 0.78  | 0.02  |
| Pu A | 0.49971              | 0.50008 | 0.49104 | 3.74                        | 0.78  | 0.02  |
| Pu B | 0.99972              | 0.49992 | 0.08299 | 3.74                        | -0.77 | 0.02  |
| Pu B | 0.49972              | 0.99992 | 0.08299 | 3.74                        | -0.77 | 0.02  |
| Pu B | 0.99992              | 0.50002 | 0.21925 | 2.18                        | -3.11 | 0.08  |
| Pu B | 0.49992              | 0.00002 | 0.21925 | 2.18                        | -3.11 | 0.08  |
| Pu B | 0.00008              | 0.49998 | 0.35478 | 2.18                        | -3.11 | 0.08  |
| Pu B | 0.50008              | 0.99998 | 0.35478 | 2.18                        | -3.11 | 0.08  |
| Pu B | 0.00028              | 0.50008 | 0.49104 | 3.74                        | -0.77 | 0.02  |
| Pu B | 0.50028              | 0.00008 | 0.49104 | 3.74                        | -0.77 | 0.02  |
| Pu C | 0.25000              | 0.75008 | 0.15138 | -2.30                       | 0.00  | -3.03 |
| Pu C | 0.75000              | 0.25008 | 0.15138 | -2.30                       | 0.00  | -3.03 |
| Pu C | 0.25000              | 0.75000 | 0.28701 | -2.22                       | 0.00  | -3.09 |
| Pu C | 0.75000              | 0.25000 | 0.28701 | -2.22                       | 0.00  | -3.09 |
| Pu C | 0.25000              | 0.74992 | 0.42265 | -2.30                       | 0.00  | -3.03 |
| Pu C | 0.75000              | 0.24992 | 0.42265 | -2.30                       | 0.00  | -3.03 |
| Pu D | 0.25000              | 0.24994 | 0.15140 | 2.25                        | 0.00  | -3.06 |
| Pu D | 0.75000              | 0.74994 | 0.15140 | 2.25                        | 0.00  | -3.06 |
| Pu D | 0.25000              | 0.25000 | 0.28701 | 2.07                        | 0.00  | -3.19 |
| Pu D | 0.75000              | 0.75000 | 0.28701 | 2.07                        | 0.00  | -3.19 |
| Pu D | 0.25000              | 0.25006 | 0.42263 | 2.25                        | 0.00  | -3.06 |
| Pu D | 0.75000              | 0.75006 | 0.42263 | 2.25                        | 0.00  | -3.06 |
| O    | 0.25000              | 0.50000 | 0.05720 |                             |       |       |
| O    | 0.75000              | 0.00000 | 0.05720 |                             |       |       |
| O    | 0.25000              | 0.99982 | 0.05697 |                             |       |       |
| O    | 0.75000              | 0.49982 | 0.05697 |                             |       |       |
| O    | 0.25000              | 0.49987 | 0.12193 |                             |       |       |
| O    | 0.75000              | 0.99987 | 0.12193 |                             |       |       |
| O    | 0.49998              | 0.74992 | 0.11201 |                             |       |       |
| O    | 0.99998              | 0.24992 | 0.11201 |                             |       |       |
| O    | 0.50002              | 0.24992 | 0.11201 |                             |       |       |
| O    | 0.00002              | 0.74992 | 0.11201 |                             |       |       |
| O    | 0.25000              | 0.99998 | 0.12145 |                             |       |       |
| O    | 0.75000              | 0.49998 | 0.12145 |                             |       |       |
| O    | 0.25000              | 0.50007 | 0.18735 |                             |       |       |
| O    | 0.75000              | 0.00007 | 0.18735 |                             |       |       |
| O    | 0.00001              | 0.25002 | 0.18341 |                             |       |       |
| O    | 0.50001              | 0.75002 | 0.18341 |                             |       |       |
| O    | 0.99999              | 0.75002 | 0.18341 |                             |       |       |

|   |         |         |         |
|---|---------|---------|---------|
| O | 0.49999 | 0.25002 | 0.18341 |
| O | 0.25000 | 0.99995 | 0.18687 |
| O | 0.75000 | 0.49995 | 0.18687 |
| O | 0.25000 | 0.50004 | 0.25385 |
| O | 0.75000 | 0.00004 | 0.25385 |
| O | 0.49999 | 0.75004 | 0.25262 |
| O | 0.99999 | 0.25004 | 0.25262 |
| O | 0.50001 | 0.25004 | 0.25262 |
| O | 0.00001 | 0.75004 | 0.25262 |
| O | 0.25000 | 0.00003 | 0.25340 |
| O | 0.75000 | 0.50003 | 0.25340 |
| O | 0.25000 | 0.49997 | 0.32063 |
| O | 0.75000 | 0.99997 | 0.32063 |
| O | 0.99999 | 0.24996 | 0.32140 |
| O | 0.49999 | 0.74996 | 0.32140 |
| O | 0.00001 | 0.74996 | 0.32140 |
| O | 0.50001 | 0.24996 | 0.32140 |
| O | 0.25000 | 0.99996 | 0.32018 |
| O | 0.75000 | 0.49996 | 0.32018 |
| O | 0.25000 | 0.50005 | 0.38716 |
| O | 0.75000 | 0.00005 | 0.38716 |
| O | 0.50001 | 0.74998 | 0.39062 |
| O | 0.00001 | 0.24998 | 0.39062 |
| O | 0.49999 | 0.24998 | 0.39062 |
| O | 0.99999 | 0.74998 | 0.39062 |
| O | 0.25000 | 0.99993 | 0.38668 |
| O | 0.75000 | 0.49993 | 0.38668 |
| O | 0.25000 | 0.50002 | 0.45258 |
| O | 0.75000 | 0.00002 | 0.45258 |
| O | 0.99998 | 0.25008 | 0.46202 |
| O | 0.49998 | 0.75008 | 0.46202 |
| O | 0.00002 | 0.75008 | 0.46202 |
| O | 0.50002 | 0.25008 | 0.46202 |
| O | 0.25000 | 0.00013 | 0.45210 |
| O | 0.75000 | 0.50013 | 0.45210 |
| O | 0.25000 | 0.50018 | 0.51706 |
| O | 0.75000 | 0.00018 | 0.51706 |
| O | 0.25000 | 0.00000 | 0.51683 |
| O | 0.75000 | 0.50000 | 0.51683 |

**Table S6** - The final minimised structure of the Reduced {100} using PBEsol + U. The ionic positions are given as fractional coordinates and the magnetic vectors are presented.

| Atom | Coordinates (Direct) |          |         | Magnetic Vector ( $\mu_B$ ) |       |       |
|------|----------------------|----------|---------|-----------------------------|-------|-------|
|      | X                    | Y        | Z       | X                           | Y     | Z     |
| Pu A | 0.00105              | 0.99977  | 0.08434 | 3.84                        | -0.13 | -0.01 |
| Pu A | 0.47786              | 0.49988  | 0.08433 | 4.20                        | -2.31 | 0.25  |
| Pu A | 0.99824              | 0.00006  | 0.21934 | 2.18                        | 3.11  | 0.08  |
| Pu A | 0.50033              | 0.50005  | 0.21919 | 2.16                        | 3.13  | 0.08  |
| Pu A | 0.99821              | 0.00002  | 0.35470 | 2.19                        | 3.11  | 0.08  |
| Pu A | 0.50027              | 0.50004  | 0.35485 | 2.18                        | 3.11  | 0.08  |
| Pu A | 0.00180              | -0.00009 | 0.48964 | 3.84                        | 0.21  | -0.03 |
| Pu A | 0.47772              | 0.50033  | 0.48974 | 3.84                        | 2.52  | -1.39 |
| Pu B | 0.02228              | 0.49981  | 0.08436 | 4.20                        | 2.23  | -0.66 |
| Pu B | 0.49759              | -0.00007 | 0.08437 | 3.76                        | -0.78 | 0.03  |
| Pu B | 0.99970              | 0.50006  | 0.21919 | 2.16                        | -3.13 | 0.08  |
| Pu B | 0.50176              | 0.00006  | 0.21934 | 2.18                        | -3.11 | 0.08  |
| Pu B | -0.00021             | 0.50003  | 0.35485 | 2.18                        | -3.11 | 0.08  |
| Pu B | 0.50185              | 0.00002  | 0.35470 | 2.19                        | -3.11 | 0.08  |
| Pu B | 0.02194              | 0.50025  | 0.48976 | 4.10                        | -2.49 | -0.39 |
| Pu B | 0.49835              | -0.00001 | 0.48961 | 3.83                        | -0.34 | -0.03 |
| Pu C | 0.25009              | 0.75284  | 0.15234 | -2.28                       | 0.01  | -3.04 |
| Pu C | 0.75005              | 0.25275  | 0.15055 | -2.22                       | -0.01 | -3.09 |
| Pu C | 0.25002              | 0.75027  | 0.28702 | -2.23                       | 0.00  | -3.08 |
| Pu C | 0.75002              | 0.25038  | 0.28702 | -2.23                       | 0.00  | -3.08 |
| Pu C | 0.25002              | 0.75256  | 0.42169 | -2.21                       | 0.00  | -3.10 |
| Pu C | 0.74999              | 0.25263  | 0.42347 | -2.31                       | 0.00  | -3.02 |
| Pu D | 0.25002              | 0.24731  | 0.15236 | 2.25                        | 0.00  | -3.07 |
| Pu D | 0.75003              | 0.74728  | 0.15058 | 2.20                        | 0.00  | -3.11 |
| Pu D | 0.25002              | 0.24978  | 0.28702 | 2.08                        | 0.00  | -3.18 |
| Pu D | 0.75002              | 0.74968  | 0.28702 | 2.08                        | 0.00  | -3.18 |
| Pu D | 0.25005              | 0.24772  | 0.42168 | 2.18                        | 0.00  | -3.13 |
| Pu D | 0.75002              | 0.74770  | 0.42342 | 2.22                        | 0.00  | -3.09 |
| O    | 0.25003              | 0.49918  | 0.05271 |                             |       |       |
| O    | 0.74973              | 0.00007  | 0.05710 |                             |       |       |
| O    | 0.24962              | 0.99932  | 0.05766 |                             |       |       |
| O    | 0.25010              | 0.49997  | 0.12144 |                             |       |       |
| O    | 0.75016              | 0.99981  | 0.12136 |                             |       |       |
| O    | 0.49701              | 0.75494  | 0.11398 |                             |       |       |
| O    | 0.00310              | 0.24464  | 0.11397 |                             |       |       |
| O    | 0.49702              | 0.24500  | 0.11398 |                             |       |       |
| O    | 0.00315              | 0.75492  | 0.11399 |                             |       |       |
| O    | 0.25062              | 0.00003  | 0.12206 |                             |       |       |
| O    | 0.75012              | 0.49994  | 0.11758 |                             |       |       |
| O    | 0.25003              | 0.50014  | 0.18706 |                             |       |       |
| O    | 0.74997              | 0.00010  | 0.18675 |                             |       |       |
| O    | 0.99918              | 0.25045  | 0.18404 |                             |       |       |
| O    | 0.50086              | 0.74968  | 0.18403 |                             |       |       |
| O    | 0.99919              | 0.74970  | 0.18404 |                             |       |       |
| O    | 0.50084              | 0.25045  | 0.18403 |                             |       |       |
| O    | 0.24996              | 0.00002  | 0.18722 |                             |       |       |



|   |         |          |         |
|---|---------|----------|---------|
| ○ | 0.75003 | 0.49997  | 0.18550 |
| ○ | 0.25002 | 0.50006  | 0.25363 |
| ○ | 0.75000 | 0.00007  | 0.25381 |
| ○ | 0.50046 | 0.74985  | 0.25278 |
| ○ | 0.99955 | 0.25030  | 0.25280 |
| ○ | 0.50048 | 0.25029  | 0.25279 |
| ○ | 0.99957 | 0.74985  | 0.25279 |
| ○ | 0.25002 | 0.00006  | 0.25342 |
| ○ | 0.75000 | 0.50006  | 0.25307 |
| ○ | 0.25002 | 0.49999  | 0.32077 |
| ○ | 0.75003 | 1.00000  | 0.32058 |
| ○ | 0.99957 | 0.25017  | 0.32126 |
| ○ | 0.50046 | 0.74982  | 0.32124 |
| ○ | 0.99959 | 0.74982  | 0.32125 |
| ○ | 0.50048 | 0.25017  | 0.32125 |
| ○ | 0.25002 | 0.99998  | 0.32027 |
| ○ | 0.75004 | 0.49999  | 0.32060 |
| ○ | 0.25005 | 0.50015  | 0.38731 |
| ○ | 0.75003 | 0.00014  | 0.38760 |
| ○ | 0.50084 | 0.74966  | 0.38995 |
| ○ | 0.99923 | 0.25048  | 0.39002 |
| ○ | 0.50082 | 0.25048  | 0.39000 |
| ○ | 0.99924 | 0.74966  | 0.38996 |
| ○ | 0.25004 | 0.00005  | 0.38653 |
| ○ | 0.75004 | 0.50006  | 0.38821 |
| ○ | 0.24986 | 0.49994  | 0.45279 |
| ○ | 0.75000 | 0.00026  | 0.45282 |
| ○ | 0.00255 | 0.24525  | 0.46013 |
| ○ | 0.49707 | 0.75551  | 0.45989 |
| ○ | 0.00304 | 0.75555  | 0.45993 |
| ○ | 0.49733 | 0.24513  | 0.46003 |
| ○ | 0.24989 | 0.00042  | 0.45184 |
| ○ | 0.74984 | 0.50033  | 0.45640 |
| ○ | 0.24997 | 0.49955  | 0.52145 |
| ○ | 0.74992 | 0.99841  | 0.51692 |
| ○ | 0.25014 | -0.00078 | 0.51632 |

**Table S7** - The final minimised structure of the stoichiometric 3K AFM {110} configuration using PBEsol + U. The ionic positions are given as fractional coordinates and the magnetic vectors are presented.

| Atom | Coordinates (Direct) |         |         | Magnetic Vector ( $\mu_B$ ) |       |       |
|------|----------------------|---------|---------|-----------------------------|-------|-------|
|      | X                    | Y       | Z       | X                           | Y     | Z     |
| Pu A | 0.00029              | 0.99992 | 0.08299 | -1.99                       | -3.32 | -0.04 |
| Pu A | 0.50029              | 0.49992 | 0.08299 | -1.40                       | -3.51 | 0.56  |
| Pu A | 0.00008              | 0.00002 | 0.21925 | -2.19                       | -3.10 | -0.01 |
| Pu A | 0.50008              | 0.50002 | 0.21925 | -2.19                       | -3.11 | 0.02  |
| Pu A | 0.99992              | 0.99998 | 0.35478 | -2.19                       | -3.10 | -0.01 |
| Pu A | 0.49992              | 0.49998 | 0.35478 | -2.21                       | -3.09 | 0.04  |
| Pu A | 0.99971              | 0.00008 | 0.49104 | -1.90                       | -3.37 | 0.08  |
| Pu A | 0.49971              | 0.50008 | 0.49104 | -1.80                       | -3.32 | 0.62  |
| Pu B | 0.99972              | 0.49992 | 0.08299 | 2.42                        | 0.00  | 2.94  |
| Pu B | 0.49972              | 0.99992 | 0.08299 | 2.04                        | 0.00  | 3.20  |
| Pu B | 0.99992              | 0.50002 | 0.21925 | 2.23                        | 0.00  | 3.07  |
| Pu B | 0.49992              | 0.00002 | 0.21925 | 2.20                        | 0.00  | 3.09  |
| Pu B | 0.00008              | 0.49998 | 0.35478 | 2.26                        | -0.01 | 3.04  |
| Pu B | 0.50008              | 0.99998 | 0.35478 | 2.10                        | 0.00  | 3.17  |
| Pu B | 0.00028              | 0.50008 | 0.49104 | 2.10                        | 0.00  | -3.17 |
| Pu B | 0.50028              | 0.00008 | 0.49104 | 2.22                        | 0.00  | -3.08 |
| Pu C | 0.25000              | 0.75008 | 0.15138 | 2.21                        | 0.00  | -3.09 |
| Pu C | 0.75000              | 0.25008 | 0.15138 | 2.22                        | 0.00  | -3.08 |
| Pu C | 0.25000              | 0.75000 | 0.28701 | 2.22                        | 0.00  | -3.09 |
| Pu C | 0.75000              | 0.25000 | 0.28701 | 2.26                        | 0.00  | -3.05 |
| Pu C | 0.25000              | 0.74992 | 0.42265 | -1.97                       | 3.34  | -0.04 |
| Pu C | 0.75000              | 0.24992 | 0.42265 | -1.32                       | 3.53  | 0.62  |
| Pu D | 0.25000              | 0.24994 | 0.15140 | -2.19                       | 3.10  | 0.00  |
| Pu D | 0.75000              | 0.74994 | 0.15140 | -2.19                       | 3.11  | 0.02  |
| Pu D | 0.25000              | 0.25000 | 0.28701 | -2.20                       | 3.10  | -0.01 |
| Pu D | 0.75000              | 0.75000 | 0.28701 | -2.21                       | 3.09  | 0.04  |
| Pu D | 0.25000              | 0.25006 | 0.42263 | -1.94                       | 3.35  | 0.09  |
| Pu D | 0.75000              | 0.75006 | 0.42263 | -1.79                       | 3.32  | 0.62  |
| O    | 0.25000              | 0.50000 | 0.05720 |                             |       |       |
| O    | 0.75000              | 0.00000 | 0.05720 |                             |       |       |
| O    | 0.25000              | 0.99982 | 0.05697 |                             |       |       |
| O    | 0.75000              | 0.49982 | 0.05697 |                             |       |       |
| O    | 0.25000              | 0.49987 | 0.12193 |                             |       |       |
| O    | 0.75000              | 0.99987 | 0.12193 |                             |       |       |
| O    | 0.49998              | 0.74992 | 0.11201 |                             |       |       |
| O    | 0.99998              | 0.24992 | 0.11201 |                             |       |       |
| O    | 0.50002              | 0.24992 | 0.11201 |                             |       |       |
| O    | 0.00002              | 0.74992 | 0.11201 |                             |       |       |
| O    | 0.25000              | 0.99998 | 0.12145 |                             |       |       |
| O    | 0.75000              | 0.49998 | 0.12145 |                             |       |       |
| O    | 0.25000              | 0.50007 | 0.18735 |                             |       |       |
| O    | 0.75000              | 0.00007 | 0.18735 |                             |       |       |
| O    | 0.00001              | 0.25002 | 0.18341 |                             |       |       |
| O    | 0.50001              | 0.75002 | 0.18341 |                             |       |       |

|   |         |         |         |
|---|---------|---------|---------|
| O | 0.99999 | 0.75002 | 0.18341 |
| O | 0.49999 | 0.25002 | 0.18341 |
| O | 0.25000 | 0.99995 | 0.18687 |
| O | 0.75000 | 0.49995 | 0.18687 |
| O | 0.25000 | 0.50004 | 0.25385 |
| O | 0.75000 | 0.00004 | 0.25385 |
| O | 0.49999 | 0.75004 | 0.25262 |
| O | 0.99999 | 0.25004 | 0.25262 |
| O | 0.50001 | 0.25004 | 0.25262 |
| O | 0.00001 | 0.75004 | 0.25262 |
| O | 0.25000 | 0.00003 | 0.25340 |
| O | 0.75000 | 0.50003 | 0.25340 |
| O | 0.25000 | 0.49997 | 0.32063 |
| O | 0.75000 | 0.99997 | 0.32063 |
| O | 0.99999 | 0.24996 | 0.32140 |
| O | 0.49999 | 0.74996 | 0.32140 |
| O | 0.00001 | 0.74996 | 0.32140 |
| O | 0.50001 | 0.24996 | 0.32140 |
| O | 0.25000 | 0.99996 | 0.32018 |
| O | 0.75000 | 0.49996 | 0.32018 |
| O | 0.25000 | 0.50005 | 0.38716 |
| O | 0.75000 | 0.00005 | 0.38716 |
| O | 0.50001 | 0.74998 | 0.39062 |
| O | 0.00001 | 0.24998 | 0.39062 |
| O | 0.49999 | 0.24998 | 0.39062 |
| O | 0.99999 | 0.74998 | 0.39062 |
| O | 0.25000 | 0.99993 | 0.38668 |
| O | 0.75000 | 0.49993 | 0.38668 |
| O | 0.25000 | 0.50002 | 0.45258 |
| O | 0.75000 | 0.00002 | 0.45258 |
| O | 0.99998 | 0.25008 | 0.46202 |
| O | 0.49998 | 0.75008 | 0.46202 |
| O | 0.00002 | 0.75008 | 0.46202 |
| O | 0.50002 | 0.25008 | 0.46202 |
| O | 0.25000 | 0.00013 | 0.45210 |
| O | 0.75000 | 0.50013 | 0.45210 |
| O | 0.25000 | 0.50018 | 0.51706 |
| O | 0.75000 | 0.00018 | 0.51706 |
| O | 0.25000 | 0.00000 | 0.51683 |
| O | 0.75000 | 0.50000 | 0.51683 |

**Table S8** - The final minimised structure of the Reduced {110} using PBEsol + U. The ionic positions are given as fractional coordinates and the magnetic vectors are presented.

| Atom | Coordinates (Direct) |         |         | Magnetic Vector ( $\mu_B$ ) |       |       |
|------|----------------------|---------|---------|-----------------------------|-------|-------|
|      | X                    | Y       | Z       | X                           | Y     | Z     |
| Pu A | 0.00102              | 0.49927 | 0.06458 | -1.69                       | -3.47 | 0.16  |
| Pu A | 0.50860              | 0.51705 | 0.06198 | -3.52                       | -2.72 | -1.80 |
| Pu A | 0.99804              | 0.99860 | 0.17571 | -2.22                       | -3.08 | 0.05  |
| Pu A | 0.49843              | 0.00017 | 0.17513 | -2.23                       | -3.08 | -0.06 |
| Pu A | 0.99694              | 0.50208 | 0.28817 | -2.20                       | -3.10 | 0.01  |
| Pu A | 0.49939              | 0.50012 | 0.28954 | -2.19                       | -3.10 | -0.09 |
| Pu A | 0.00407              | 0.99900 | 0.39877 | -1.77                       | -3.43 | -0.18 |
| Pu A | 0.51201              | 0.98313 | 0.40183 | 1.14                        | -2.15 | -4.14 |
| Pu B | 0.24994              | 0.75039 | 0.11362 | 2.30                        | 0.01  | 3.03  |
| Pu B | 0.75472              | 0.74844 | 0.11563 | 2.29                        | -0.02 | 3.03  |
| Pu B | 0.24971              | 0.25053 | 0.23146 | 2.13                        | 0.00  | 3.15  |
| Pu B | 0.74708              | 0.25005 | 0.23218 | 2.25                        | 0.01  | 3.06  |
| Pu B | 0.25422              | 0.74996 | 0.35074 | 1.95                        | -0.01 | 3.26  |
| Pu B | 0.75350              | 0.74991 | 0.34882 | 2.35                        | 0.00  | 2.98  |
| Pu B | 0.24174              | 0.25200 | 0.11844 | 2.77                        | -0.12 | -3.93 |
| Pu B | 0.74847              | 0.24909 | 0.11537 | 2.31                        | -0.01 | -3.03 |
| Pu C | 0.24825              | 0.75013 | 0.23215 | 2.26                        | 0.01  | -3.05 |
| Pu C | 0.74569              | 0.74953 | 0.23195 | 2.22                        | 0.00  | -3.08 |
| Pu C | 0.24251              | 0.25009 | 0.34384 | 2.59                        | 0.00  | -2.80 |
| Pu C | 0.74703              | 0.25002 | 0.35026 | 2.12                        | 0.00  | -3.15 |
| Pu C | 0.00109              | 0.99998 | 0.06462 | -1.70                       | 3.46  | 0.19  |
| Pu C | 0.50766              | 0.97846 | 0.06440 | -0.83                       | 2.27  | -3.00 |
| Pu D | 0.99794              | 0.50116 | 0.17572 | -2.23                       | 3.07  | 0.05  |
| Pu D | 0.49832              | 0.50067 | 0.17416 | -2.21                       | 3.09  | -0.05 |
| Pu D | 0.99695              | 0.99779 | 0.28812 | -2.20                       | 3.10  | 0.02  |
| Pu D | 0.49939              | 0.00015 | 0.28978 | -2.19                       | 3.11  | -0.10 |
| Pu D | 0.00406              | 0.50074 | 0.39880 | -1.78                       | 3.43  | -0.18 |
| Pu D | 0.51195              | 0.51700 | 0.40175 | 1.12                        | 2.17  | -4.14 |
| O    | 0.11999              | 0.74938 | 0.05925 |                             |       |       |
| O    | 0.63007              | 0.75766 | 0.05922 |                             |       |       |
| O    | 0.37933              | 0.76327 | 0.05810 |                             |       |       |
| O    | 0.88479              | 0.74875 | 0.06141 |                             |       |       |
| O    | 0.12050              | 0.24989 | 0.05804 |                             |       |       |
| O    | 0.58657              | 0.23642 | 0.05903 |                             |       |       |
| O    | 0.87790              | 0.24933 | 0.06128 |                             |       |       |
| O    | 0.11949              | 0.50921 | 0.11773 |                             |       |       |
| O    | 0.62985              | 0.50107 | 0.11688 |                             |       |       |
| O    | 0.12014              | 0.99199 | 0.11764 |                             |       |       |
| O    | 0.62815              | 0.99548 | 0.11788 |                             |       |       |
| O    | 0.37662              | 0.49828 | 0.11428 |                             |       |       |
| O    | 0.87572              | 0.49705 | 0.11759 |                             |       |       |
| O    | 0.37926              | 0.00736 | 0.11484 |                             |       |       |
| O    | 0.87538              | 0.00086 | 0.11753 |                             |       |       |
| O    | 0.11947              | 0.25021 | 0.17575 |                             |       |       |
| O    | 0.62328              | 0.24994 | 0.17345 |                             |       |       |
| O    | 0.37645              | 0.25058 | 0.17656 |                             |       |       |

|   |         |         |         |
|---|---------|---------|---------|
| O | 0.87061 | 0.24949 | 0.17407 |
| O | 0.12397 | 0.75014 | 0.17542 |
| O | 0.62318 | 0.74931 | 0.17460 |
| O | 0.37305 | 0.75133 | 0.17249 |
| O | 0.87346 | 0.74954 | 0.17451 |
| O | 0.12354 | 0.00174 | 0.23210 |
| O | 0.62230 | 0.00198 | 0.23196 |
| O | 0.12349 | 0.49863 | 0.23215 |
| O | 0.62207 | 0.49767 | 0.23175 |
| O | 0.37373 | 0.99490 | 0.23228 |
| O | 0.87202 | 0.99885 | 0.23182 |
| O | 0.37383 | 0.50610 | 0.23195 |
| O | 0.87199 | 0.50058 | 0.23186 |
| O | 0.12306 | 0.75002 | 0.28871 |
| O | 0.62306 | 0.74999 | 0.28862 |
| O | 0.37480 | 0.75007 | 0.29241 |
| O | 0.87313 | 0.74978 | 0.28922 |
| O | 0.12206 | 0.24999 | 0.28924 |
| O | 0.62233 | 0.25001 | 0.29014 |
| O | 0.37239 | 0.25044 | 0.28789 |
| O | 0.87219 | 0.24992 | 0.28931 |
| O | 0.12369 | 0.50400 | 0.34548 |
| O | 0.62954 | 0.50448 | 0.34529 |
| O | 0.12378 | 0.99593 | 0.34548 |
| O | 0.62963 | 0.99553 | 0.34536 |
| O | 0.37399 | 0.48076 | 0.34915 |
| O | 0.87762 | 0.49749 | 0.34674 |
| O | 0.37414 | 0.01957 | 0.34917 |
| O | 0.87767 | 0.00230 | 0.34671 |
| O | 0.13372 | 0.24995 | 0.40199 |
| O | 0.60974 | 0.25009 | 0.40300 |
| O | 0.88842 | 0.24987 | 0.40367 |
| O | 0.12118 | 0.74988 | 0.40401 |
| O | 0.63510 | 0.75004 | 0.40480 |
| O | 0.37703 | 0.75017 | 0.40337 |
| O | 0.88877 | 0.74987 | 0.40237 |

**Table S9** - The final minimised structure of the stoichiometric 3K AFM {111} configuration using PBEsol + U. The ionic positions are given as fractional coordinates and the magnetic vectors are presented.

| Atom | Coordinates (Direct) |          |         | Magnetic Vector ( $\mu_B$ ) |       |       |
|------|----------------------|----------|---------|-----------------------------|-------|-------|
|      | X                    | Y        | Z       | X                           | Y     | Z     |
| Pu A | 0.66692              | 0.66682  | 0.08245 | -3.21                       | -1.85 | -0.95 |
| Pu A | 0.33326              | 0.33326  | 0.17335 | -3.09                       | -1.79 | -1.30 |
| Pu A | 0.00000              | 1.00000  | 0.26522 | -3.10                       | -1.79 | -1.26 |
| Pu A | 0.66674              | 0.66674  | 0.35710 | -3.09                       | -1.79 | -1.30 |
| Pu A | 0.33308              | 0.33318  | 0.44800 | -3.21                       | -1.85 | -0.95 |
| Pu B | 0.66687              | 0.16635  | 0.08245 | 0.00                        | 3.71  | -0.95 |
| Pu B | 0.33324              | 0.83357  | 0.17334 | 0.00                        | 3.57  | -1.29 |
| Pu B | 0.00000              | 0.50000  | 0.26522 | 0.00                        | 3.58  | -1.26 |
| Pu B | 0.66676              | 0.16643  | 0.35710 | 0.00                        | 3.57  | -1.29 |
| Pu B | 0.33313              | 0.83365  | 0.44799 | 0.00                        | 3.71  | -0.95 |
| Pu C | 0.16640              | 0.66680  | 0.08245 | 3.21                        | -1.85 | -0.95 |
| Pu C | 0.83357              | 0.33324  | 0.17335 | 3.09                        | -1.78 | -1.30 |
| Pu C | 0.50000              | 1.00000  | 0.26522 | 3.10                        | -1.79 | -1.26 |
| Pu C | 0.16643              | 0.66676  | 0.35710 | 3.09                        | -1.78 | -1.30 |
| Pu C | 0.83360              | 0.33320  | 0.44799 | 3.21                        | -1.85 | -0.95 |
| Pu D | 0.16674              | 0.16663  | 0.08229 | 0.04                        | -0.11 | 3.79  |
| Pu D | 0.83337              | 0.83336  | 0.17339 | 0.00                        | 0.00  | 3.80  |
| Pu D | 0.50000              | 0.50000  | 0.26522 | 0.00                        | 0.00  | 3.80  |
| Pu D | 0.16663              | 0.16664  | 0.35705 | 0.00                        | 0.00  | 3.80  |
| Pu D | 0.83326              | 0.83337  | 0.44815 | 0.04                        | -0.11 | 3.79  |
| O    | 0.00003              | -0.00002 | 0.06007 |                             |       |       |
| O    | 0.50005              | 0.49996  | 0.06043 |                             |       |       |
| O    | 0.50013              | -0.00003 | 0.06007 |                             |       |       |
| O    | 0.00003              | 0.50007  | 0.06006 |                             |       |       |
| O    | 0.33302              | 0.83413  | 0.10563 |                             |       |       |
| O    | 0.83417              | 0.33298  | 0.10564 |                             |       |       |
| O    | 0.83337              | 0.83330  | 0.10547 |                             |       |       |
| O    | 0.33298              | 0.33299  | 0.10564 |                             |       |       |
| O    | 0.66676              | 0.66673  | 0.14985 |                             |       |       |
| O    | 0.16667              | 0.16668  | 0.15017 |                             |       |       |
| O    | 0.16658              | 0.66675  | 0.14985 |                             |       |       |
| O    | 0.66678              | 0.16656  | 0.14984 |                             |       |       |
| O    | 0.99995              | 0.50024  | 0.19629 |                             |       |       |
| O    | 0.50029              | -0.00009 | 0.19628 |                             |       |       |
| O    | 0.50004              | 0.50004  | 0.19627 |                             |       |       |
| O    | -0.00015             | 0.99992  | 0.19629 |                             |       |       |
| O    | 0.33336              | 0.33330  | 0.24232 |                             |       |       |
| O    | 0.83332              | 0.83332  | 0.24230 |                             |       |       |
| O    | 0.83336              | 0.33332  | 0.24232 |                             |       |       |
| O    | 0.33329              | 0.83341  | 0.24230 |                             |       |       |
| O    | 0.66671              | 0.16659  | 0.28814 |                             |       |       |
| O    | 0.16664              | 0.66668  | 0.28813 |                             |       |       |
| O    | 0.16668              | 0.16668  | 0.28815 |                             |       |       |
| O    | 0.66664              | 0.66670  | 0.28813 |                             |       |       |

|   |          |         |         |
|---|----------|---------|---------|
| O | 0.00015  | 0.00008 | 0.33416 |
| O | 0.49996  | 0.49996 | 0.33418 |
| O | 0.49971  | 0.00009 | 0.33417 |
| O | 0.00005  | 0.49976 | 0.33415 |
| O | 0.33322  | 0.83344 | 0.38061 |
| O | 0.83342  | 0.33325 | 0.38059 |
| O | 0.83333  | 0.83332 | 0.38028 |
| O | 0.33324  | 0.33327 | 0.38060 |
| O | 0.66702  | 0.66701 | 0.42480 |
| O | 0.16663  | 0.16670 | 0.42498 |
| O | 0.16583  | 0.66702 | 0.42481 |
| O | 0.66698  | 0.16587 | 0.42482 |
| O | 0.99997  | 0.49993 | 0.47038 |
| O | 0.49987  | 0.00003 | 0.47038 |
| O | 0.49995  | 0.50004 | 0.47002 |
| O | -0.00003 | 0.00002 | 0.47038 |

**Table S10** - The final minimised structure of the Reduced {111} using PBEsol + U. The ionic positions are given as fractional coordinates and the magnetic vectors are presented.

| Atom | Coordinates (Direct) |         |         | Magnetic Vector ( $\mu_B$ ) |       |       |
|------|----------------------|---------|---------|-----------------------------|-------|-------|
|      | X                    | Y       | Z       | X                           | Y     | Z     |
| Pu A | 0.66769              | 0.66738 | 0.08020 | -3.26                       | -1.86 | -0.75 |
| Pu A | 0.33502              | 0.33476 | 0.17556 | -3.09                       | -1.78 | -1.31 |
| Pu A | 0.99967              | 0.99898 | 0.26502 | -3.09                       | -1.79 | -1.29 |
| Pu A | 0.66574              | 0.66624 | 0.35782 | -3.06                       | -1.76 | -1.40 |
| Pu A | 0.32433              | 0.32458 | 0.44783 | -2.98                       | -1.95 | -3.22 |
| Pu B | 0.64887              | 0.17607 | 0.08245 | -2.80                       | 2.14  | 3.26  |
| Pu B | 0.33201              | 0.83388 | 0.17287 | -0.01                       | 3.62  | -1.15 |
| Pu B | 0.99816              | 0.50240 | 0.26521 | 0.00                        | 3.57  | -1.29 |
| Pu B | 0.66585              | 0.16815 | 0.35757 | -0.01                       | 3.53  | -1.39 |
| Pu B | 0.32422              | 0.85140 | 0.44792 | 0.20                        | 3.56  | -3.21 |
| Pu C | 0.17614              | 0.64866 | 0.08245 | 0.24                        | -3.51 | 3.26  |
| Pu C | 0.83440              | 0.33158 | 0.17293 | 3.13                        | -1.81 | -1.15 |
| Pu C | 0.50272              | 0.99764 | 0.26502 | 3.09                        | -1.78 | -1.29 |
| Pu C | 0.16700              | 0.66666 | 0.35814 | 3.08                        | -1.78 | -1.33 |
| Pu C | 0.85506              | 0.32251 | 0.44603 | 1.00                        | -0.59 | -3.64 |
| Pu D | 0.17771              | 0.17739 | 0.08443 | 0.83                        | 0.49  | 3.69  |
| Pu D | 0.83410              | 0.83369 | 0.17209 | -0.04                       | -0.01 | 3.80  |
| Pu D | 0.50080              | 0.50076 | 0.26561 | 0.04                        | 0.02  | 3.80  |
| Pu D | 0.16910              | 0.16549 | 0.35478 | -0.02                       | 0.02  | 3.80  |
| Pu D | 0.83408              | 0.83330 | 0.45049 | 0.01                        | -0.34 | 3.77  |
| O    | 0.51081              | 0.51055 | 0.05803 |                             |       |       |
| O    | 0.48980              | 0.99577 | 0.05742 |                             |       |       |
| O    | 0.99580              | 0.48967 | 0.05741 |                             |       |       |
| O    | 0.30620              | 0.85558 | 0.10389 |                             |       |       |
| O    | 0.85610              | 0.30549 | 0.10386 |                             |       |       |
| O    | 0.83706              | 0.83692 | 0.10332 |                             |       |       |
| O    | 0.33186              | 0.33155 | 0.10675 |                             |       |       |
| O    | 0.66432              | 0.66355 | 0.14689 |                             |       |       |
| O    | 0.17100              | 0.17063 | 0.15198 |                             |       |       |
| O    | 0.17034              | 0.66202 | 0.15163 |                             |       |       |
| O    | 0.66246              | 0.17012 | 0.15167 |                             |       |       |
| O    | 0.99425              | 0.50394 | 0.19643 |                             |       |       |
| O    | 0.50431              | 0.99375 | 0.19634 |                             |       |       |
| O    | 0.50280              | 0.50257 | 0.19693 |                             |       |       |
| O    | 0.00011              | 0.99948 | 0.19561 |                             |       |       |
| O    | 0.33336              | 0.33302 | 0.24265 |                             |       |       |
| O    | 0.83436              | 0.83392 | 0.24206 |                             |       |       |
| O    | 0.83486              | 0.33164 | 0.24219 |                             |       |       |
| O    | 0.33206              | 0.83441 | 0.24217 |                             |       |       |
| O    | 0.66600              | 0.16816 | 0.28827 |                             |       |       |
| O    | 0.16842              | 0.66559 | 0.28842 |                             |       |       |
| O    | 0.16718              | 0.16676 | 0.28765 |                             |       |       |
| O    | 0.66639              | 0.66583 | 0.28822 |                             |       |       |
| O    | 0.99788              | 0.99711 | 0.33390 |                             |       |       |
| O    | 0.50058              | 0.50022 | 0.33490 |                             |       |       |



|   |         |         |         |
|---|---------|---------|---------|
| O | 0.50555 | 0.99689 | 0.33360 |
| O | 0.99729 | 0.50552 | 0.33400 |
| O | 0.33209 | 0.83785 | 0.37880 |
| O | 0.84137 | 0.32931 | 0.37871 |
| O | 0.82853 | 0.83586 | 0.38330 |
| O | 0.33228 | 0.33020 | 0.37869 |
| O | 0.66164 | 0.64498 | 0.42667 |
| O | 0.16334 | 0.16839 | 0.42357 |
| O | 0.17392 | 0.66320 | 0.42710 |
| O | 0.66197 | 0.19318 | 0.42663 |
| O | 0.98543 | 0.50408 | 0.47305 |
| O | 0.52106 | 0.98967 | 0.47248 |
| O | 0.98536 | 0.01067 | 0.47315 |

## Section S3: Structural Configurations - Stoichiometric, Reduced and Adsorption Configurations

**Figure S1** - The top view images of the relaxed final configuration of a stoichiometric {100}, reduced {100} and CO<sub>2</sub> adsorbed on the {100} surface; Pu<sup>4+</sup> in dark grey, O in red, Oxygen Vacancies are marked by a yellow star and Pu<sup>3+</sup> is highlighted by a circle. Note we only draw the top side of the slab as the bottom side is symmetric. Also note we show a side view for the {100}-Redu-CO<sub>2</sub> ⊥ (Configuration – IVa) for clarity.

Stoichiometric {100}

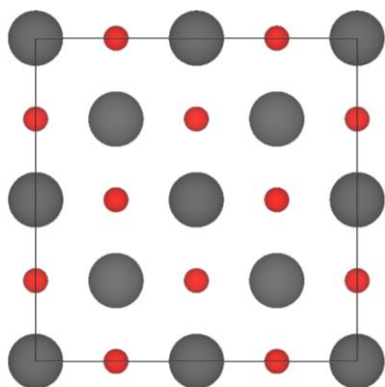

Surface Energy = 1.98eV

Reduced {100}

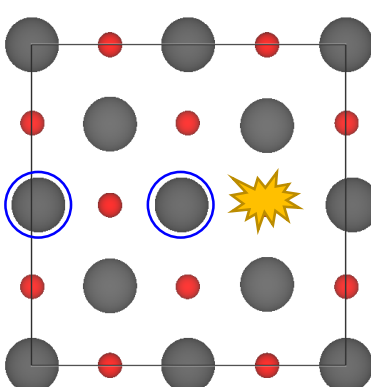

Surface Energy = 2.53eV

{100}-Stoich-CO<sub>3</sub> ||

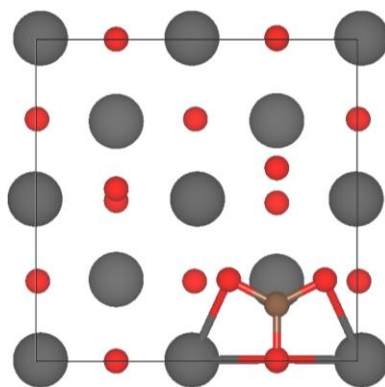

Configuration – Ia E<sub>ads</sub> = -2.69eV

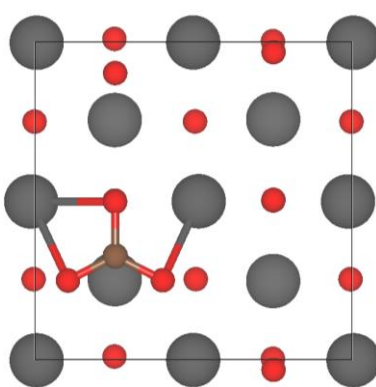

Configuration – Ib E<sub>ads</sub> = -2.68eV

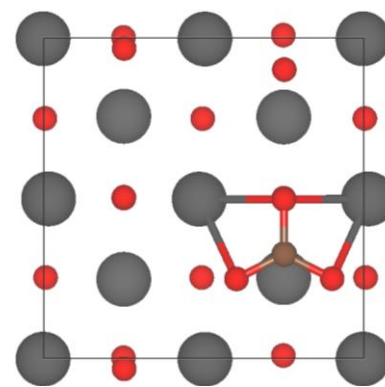

Configuration – Ic E<sub>ads</sub> = -2.67eV

{100}-Redu-CO<sub>3</sub> ||

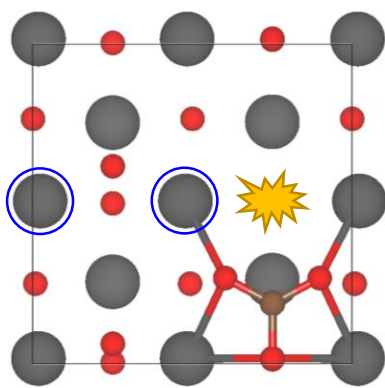

Configuration – IIa E<sub>ads</sub> = -3.17eV

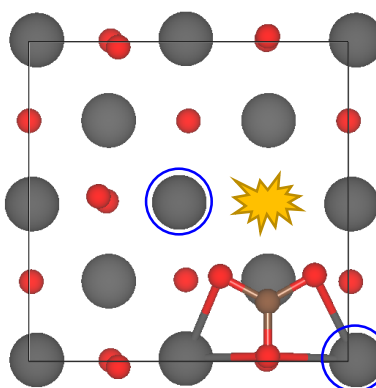

Configuration – IIb E<sub>ads</sub> = -3.13eV

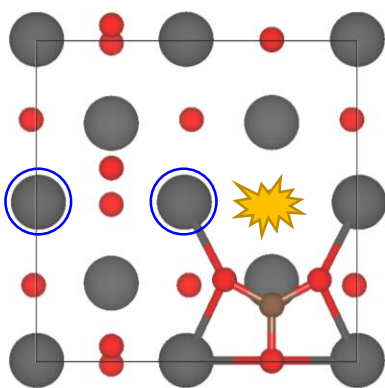

Configuration – IIc E<sub>ads</sub> = -3.09eV

cont. {100}-Redu-CO<sub>3</sub> ||

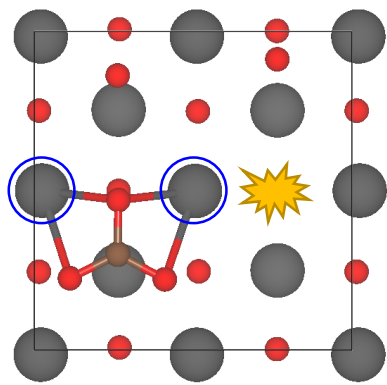

Configuration - II d  $E_{ads} = -2.98\text{eV}$

{100}-Redu-CO<sub>3</sub> ⊥

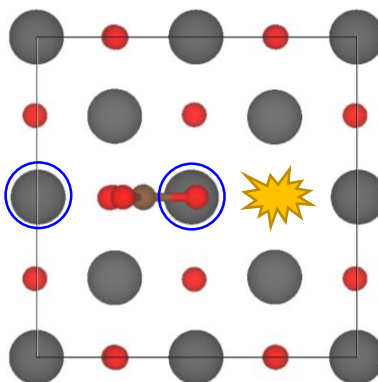

Configuration - III a  $E_{ads} = -1.17\text{eV}$

{100}-Redu-CO<sub>2</sub> ⊥

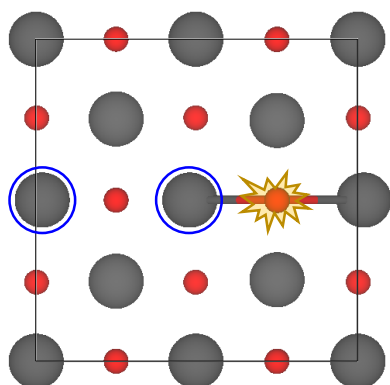

Configuration - IV a  $E_{ads} = -0.43\text{eV}$

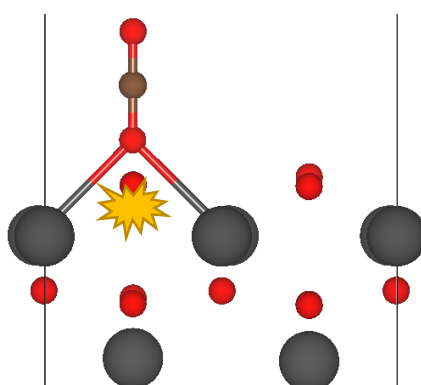

Configuration - IV a (Side View)

**Figure S2** - The top view images of the relaxed final configuration of a stoichiometric {110}, reduced {110} and CO<sub>2</sub> adsorbed on the {110} surface; Pu<sup>4+</sup> in dark grey, O in red, Oxygen Vacancies are marked by a yellow star and Pu<sup>3+</sup> is highlighted by a circle. Note we only draw the top side of the slab as the bottom side is symmetric.

Stoichiometric {110}

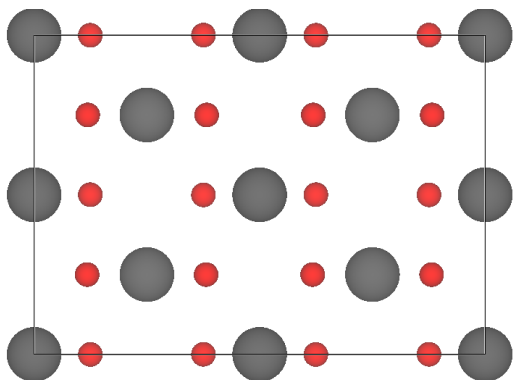

Surface Energy = 1.36eV

Reduced {110}

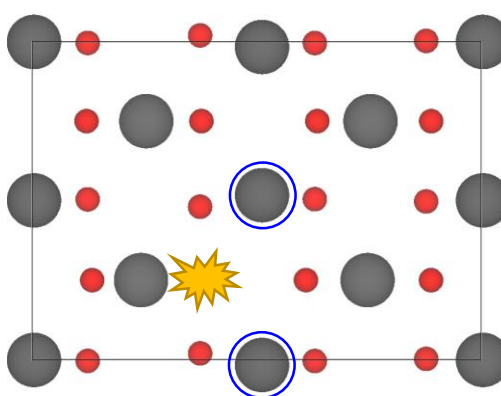

Surface Energy = 1.82eV

{110}-Stoich-CO<sub>3</sub> ∠

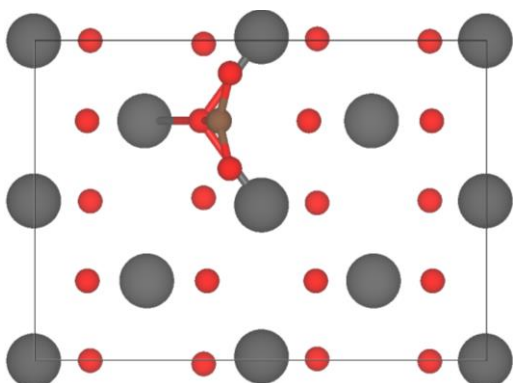

Configuration - Va

$E_{ads} = -1.67$

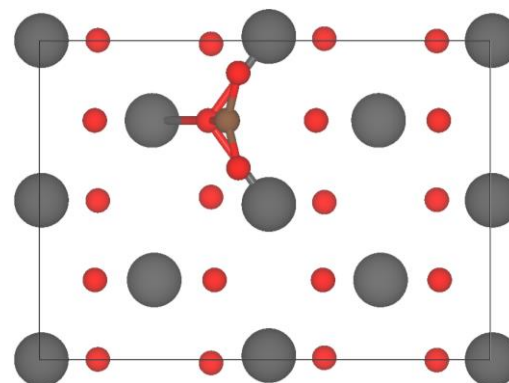

Configuration - Vb

$E_{ads} = -1.67eV$

{110}-Redu-CO<sub>3</sub> ∠

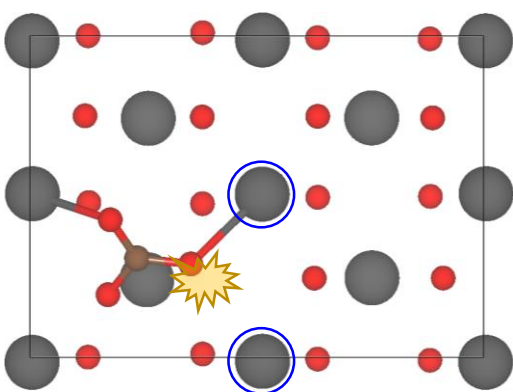

Configuration - Via

$E_{ads} = -1.99eV$

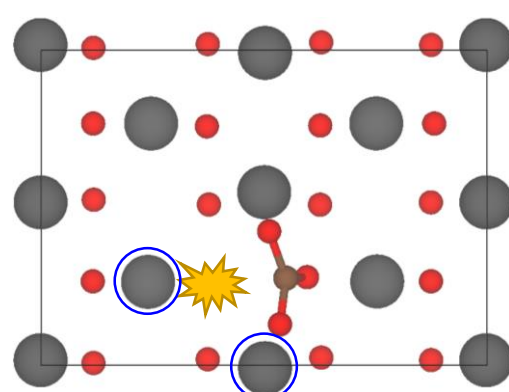

Configuration - Vlb

$E_{ads} = -1.41eV$

cont. {110}-Redu-CO<sub>3</sub> ∠

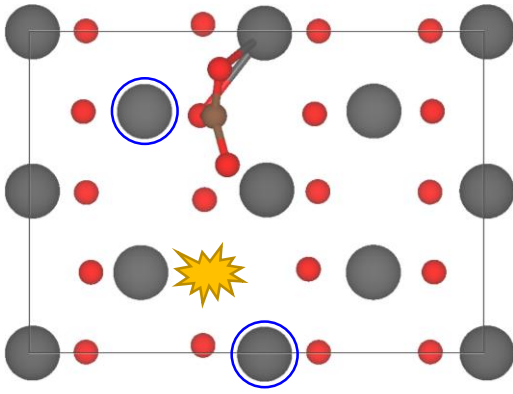

Configuration - VIc

$E_{ads} = -1.40\text{eV}$

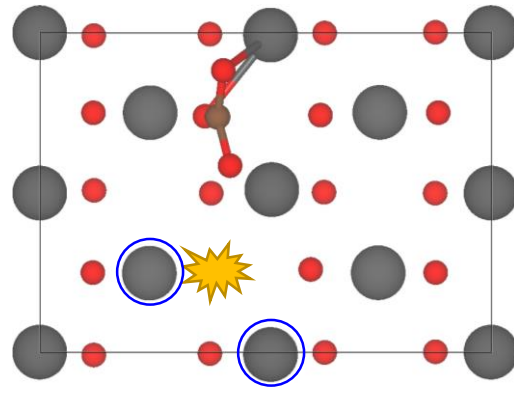

Configuration - VIId

$E_{ads} = -1.35\text{eV}$

{110}-Redu-CO<sub>3</sub> ⊥

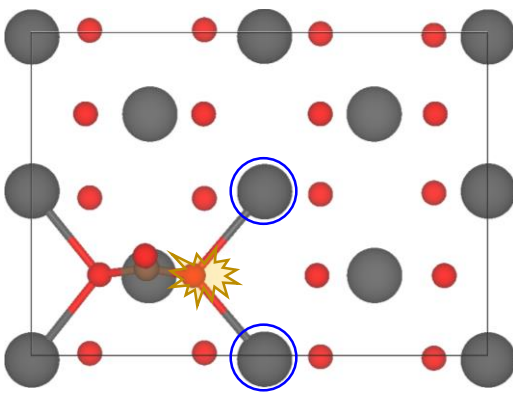

Configuration - VIIa

$E_{ads} = -1.93\text{eV}$

{110}-Stoich-CO<sub>2</sub> ∥

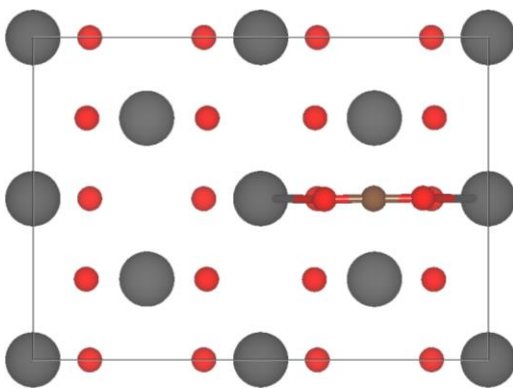

Configuration - VIIIa

$E_{ads} = -0.35\text{eV}$

{110}-Redu-CO<sub>2</sub> ∥

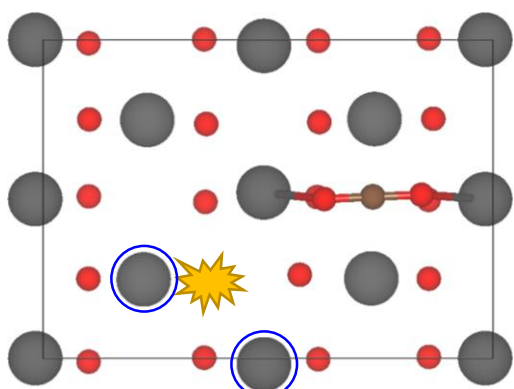

Configuration - IXa

$E_{ads} = -0.32\text{eV}$

**Figure S3** - The top view images of the relaxed final configuration of a stoichiometric {111}, reduced {111} and CO<sub>2</sub> adsorbed on the {111} surface; Pu<sup>4+</sup> in dark grey, O in red, Oxygen Vacancies are marked by a yellow star and Pu<sup>3+</sup> is highlighted by a circle. Note we only draw the top side of the slab as the bottom side is symmetric.

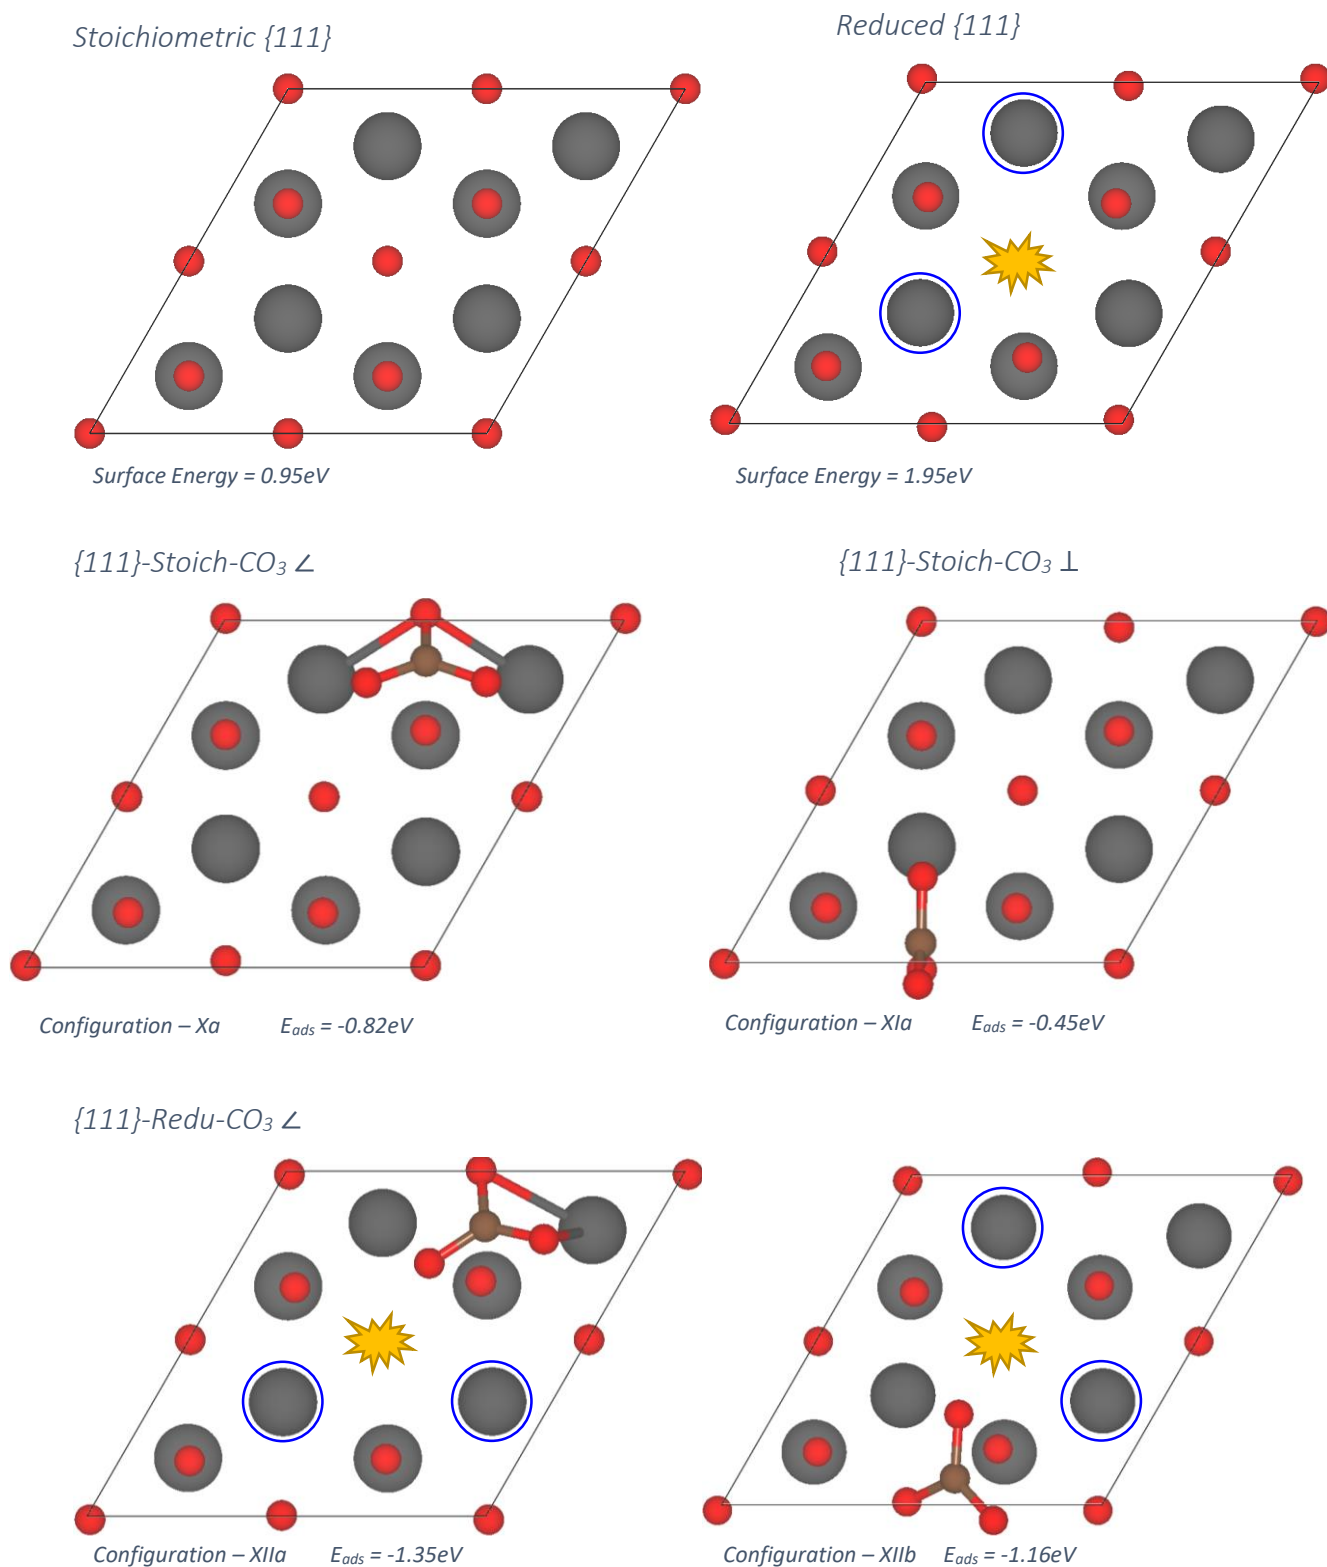

{111}-Stoich-CO<sub>2</sub> ∠

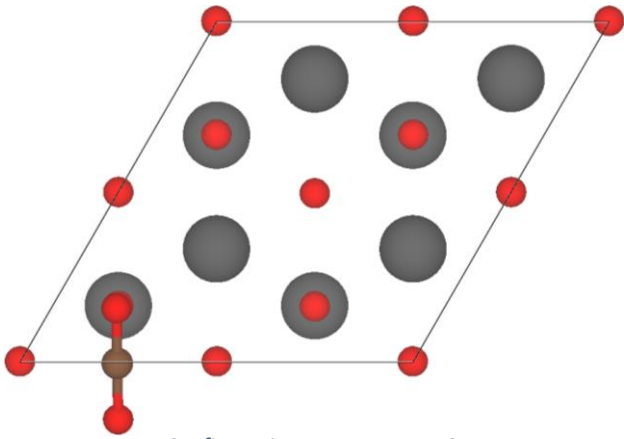

Configuration - XIIIa  $E_{ads} = -0.15\text{eV}$

{111}-Redu-CO<sub>2</sub> ∠

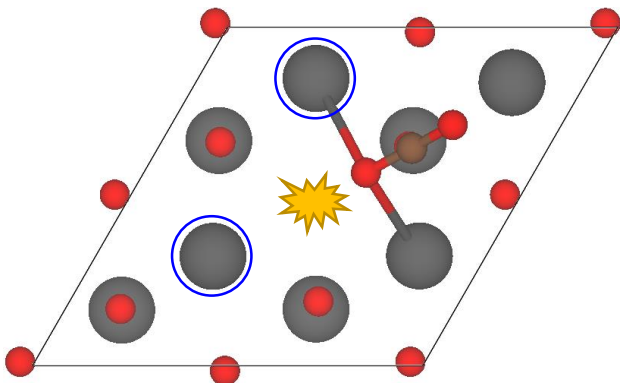

Configuration - XIVa  $E_{ads} = -0.46\text{eV}$

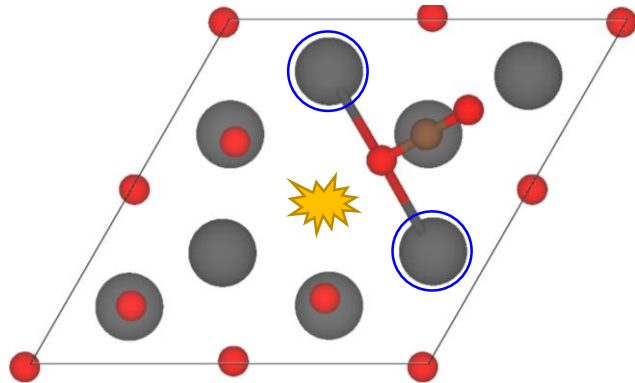

Configuration - XIVb  $E_{ads} = -0.35\text{eV}$

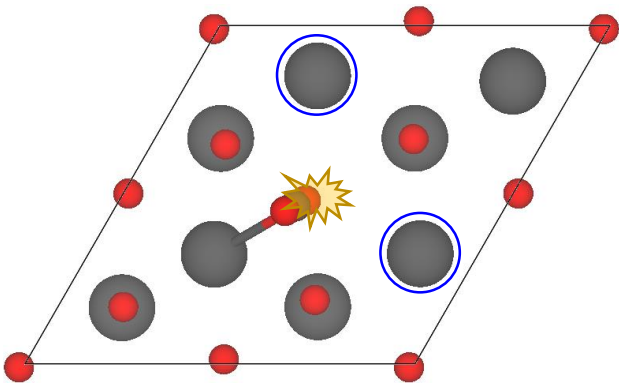

Configuration - XIV  $E_{ads} = -0.33\text{eV}$

## Section S4: Surface Structure and Magnetisation - {100} Adsorption

**Table S11** - The final minimised structure of the {100}-Stoich-Flat-CO<sub>3</sub> || configuration Ia using PBEsol + U. The ionic positions are given as fractional coordinates and the magnetic vectors are presented.

| Atom | Coordinates (Direct) |         |         | Magnetic Vector ( $\mu_B$ ) |       |       |
|------|----------------------|---------|---------|-----------------------------|-------|-------|
|      | X                    | Y       | Z       | X                           | Y     | Z     |
| Pu A | 0.01451              | 0.00406 | 0.08488 | 2.23                        | 3.06  | 0.49  |
| Pu A | 0.50283              | 0.50421 | 0.08200 | 2.67                        | -0.23 | 2.67  |
| Pu A | 0.00011              | 0.99908 | 0.21903 | 2.18                        | 3.11  | 0.06  |
| Pu A | 0.50131              | 0.49961 | 0.21951 | 2.18                        | 3.11  | 0.09  |
| Pu A | 0.00003              | 0.99910 | 0.35500 | 2.16                        | 3.13  | 0.08  |
| Pu A | 0.50108              | 0.49965 | 0.35453 | 2.18                        | 3.11  | 0.06  |
| Pu A | 0.01423              | 0.00426 | 0.48916 | -2.09                       | 3.17  | 0.43  |
| Pu A | 0.50297              | 0.50444 | 0.49202 | 2.53                        | 0.27  | -2.80 |
| Pu B | 0.99717              | 0.50424 | 0.08201 | 2.83                        | 0.15  | 2.50  |
| Pu B | 0.48553              | 0.00403 | 0.08489 | 2.23                        | -3.06 | 0.49  |
| Pu B | 0.99876              | 0.49961 | 0.21951 | 2.18                        | -3.11 | 0.09  |
| Pu B | 0.49995              | 0.99908 | 0.21903 | 2.18                        | -3.11 | 0.06  |
| Pu B | 0.99889              | 0.49965 | 0.35453 | 2.19                        | -3.11 | 0.06  |
| Pu B | 0.49996              | 0.99910 | 0.35500 | 2.15                        | -3.13 | 0.08  |
| Pu B | 0.99699              | 0.50443 | 0.49202 | 2.55                        | -0.32 | -2.77 |
| Pu B | 0.48561              | 0.00427 | 0.48917 | 2.10                        | 3.16  | -0.50 |
| Pu C | 0.25003              | 0.74574 | 0.15190 | -2.24                       | 0.00  | -3.07 |
| Pu C | 0.75004              | 0.24895 | 0.15143 | -2.16                       | 0.00  | -3.14 |
| Pu C | 0.25002              | 0.74957 | 0.28701 | -2.23                       | 0.00  | -3.08 |
| Pu C | 0.75001              | 0.24879 | 0.28703 | -2.23                       | 0.00  | -3.08 |
| Pu C | 0.25002              | 0.74573 | 0.42215 | -2.30                       | 0.02  | -3.03 |
| Pu C | 0.74994              | 0.24882 | 0.42260 | -2.10                       | -0.01 | -3.18 |
| Pu D | 0.25003              | 0.25442 | 0.15220 | 2.13                        | 0.00  | -3.15 |
| Pu D | 0.75002              | 0.74778 | 0.15046 | 2.15                        | 0.00  | -3.14 |
| Pu D | 0.25002              | 0.24924 | 0.28701 | 2.08                        | 0.00  | -3.18 |
| Pu D | 0.75001              | 0.75008 | 0.28703 | 2.08                        | 0.00  | -3.19 |
| Pu D | 0.24995              | 0.25457 | 0.42186 | 2.22                        | 0.02  | -3.09 |
| Pu D | 0.75002              | 0.74786 | 0.42359 | 2.15                        | -0.02 | -3.14 |
| O    | 0.24995              | 0.53540 | 0.05779 |                             |       |       |
| O    | 0.25003              | 0.99974 | 0.05677 |                             |       |       |
| O    | 0.24994              | 0.49940 | 0.12207 |                             |       |       |
| O    | 0.74995              | 0.00158 | 0.11698 |                             |       |       |
| O    | 0.49650              | 0.75270 | 0.11396 |                             |       |       |
| O    | 0.00595              | 0.24902 | 0.11472 |                             |       |       |
| O    | 0.49410              | 0.24913 | 0.11472 |                             |       |       |
| O    | 0.00349              | 0.75280 | 0.11395 |                             |       |       |
| O    | 0.25004              | 0.00096 | 0.12100 |                             |       |       |
| O    | 0.75019              | 0.49272 | 0.12139 |                             |       |       |
| O    | 0.25004              | 0.50028 | 0.18770 |                             |       |       |
| O    | 0.75005              | 0.99733 | 0.18533 |                             |       |       |
| O    | 0.99832              | 0.24972 | 0.18453 |                             |       |       |
| O    | 0.50176              | 0.74871 | 0.18381 |                             |       |       |
| O    | 0.99830              | 0.74870 | 0.18382 |                             |       |       |
| O    | 0.50175              | 0.24971 | 0.18453 |                             |       |       |



|       |         |          |         |
|-------|---------|----------|---------|
| O     | 0.25003 | 0.99877  | 0.18658 |
| O     | 0.75002 | 0.50033  | 0.18650 |
| O     | 0.25003 | 0.49956  | 0.25386 |
| O     | 0.75002 | -0.00065 | 0.25329 |
| O     | 0.50037 | 0.74995  | 0.25279 |
| O     | 0.99966 | 0.24889  | 0.25285 |
| O     | 0.50039 | 0.24889  | 0.25285 |
| O     | 0.99968 | 0.74995  | 0.25279 |
| O     | 0.25004 | -0.00075 | 0.25318 |
| O     | 0.75003 | 0.49957  | 0.25352 |
| O     | 0.24999 | 0.49950  | 0.32049 |
| O     | 0.75000 | -0.00073 | 0.32116 |
| O     | 0.99967 | 0.24882  | 0.32117 |
| O     | 0.50033 | 0.74991  | 0.32123 |
| O     | 0.99968 | 0.74990  | 0.32123 |
| O     | 0.50034 | 0.24882  | 0.32117 |
| O     | 0.25000 | -0.00083 | 0.32050 |
| O     | 0.74999 | 0.49950  | 0.32021 |
| O     | 0.24998 | 0.50043  | 0.38658 |
| O     | 0.74998 | 0.99756  | 0.38914 |
| O     | 0.50174 | 0.74883  | 0.39020 |
| O     | 0.99833 | 0.24979  | 0.38951 |
| O     | 0.50160 | 0.24980  | 0.38950 |
| O     | 0.99826 | 0.74883  | 0.39020 |
| O     | 0.24998 | 0.99889  | 0.38711 |
| O     | 0.74998 | 0.50048  | 0.38731 |
| O     | 0.24996 | 0.49958  | 0.45201 |
| O     | 0.75001 | 0.00177  | 0.45733 |
| O     | 0.00573 | 0.24920  | 0.45931 |
| O     | 0.49661 | 0.75290  | 0.46005 |
| O     | 0.00345 | 0.75288  | 0.46005 |
| O     | 0.49416 | 0.24919  | 0.45931 |
| O     | 0.25001 | 0.00112  | 0.45292 |
| O     | 0.75000 | 0.49273  | 0.45261 |
| O     | 0.25001 | 0.53621  | 0.51620 |
| O     | 0.24991 | 0.00069  | 0.51715 |
| O     | 0.75000 | 0.60097  | 0.51270 |
| O     | 0.74995 | 0.00625  | 0.52575 |
| O     | 0.74990 | 0.60009  | 0.06127 |
| O     | 0.74999 | 0.00561  | 0.04845 |
| O     | 0.89959 | 0.25372  | 0.52486 |
| O     | 0.89960 | 0.25309  | 0.04922 |
| O     | 0.60033 | 0.25371  | 0.52486 |
| O     | 0.60032 | 0.25305  | 0.04922 |
| <hr/> |         |          |         |
| C     | 0.74997 | 0.17695  | 0.52646 |
| C     | 0.74998 | 0.17637  | 0.04765 |

**Table S12** - The final minimised structure of the {100}-Stoich-Flat-CO<sub>3</sub> || configuration Ib using PBEsol + U. The ionic positions are given as fractional coordinates and the magnetic vectors are presented.

| Atom | Coordinates (Direct) |         |         | Magnetic Vector ( $\mu_B$ ) |       |       |
|------|----------------------|---------|---------|-----------------------------|-------|-------|
|      | X                    | Y       | Z       | X                           | Y     | Z     |
| Pu A | 0.00408              | 0.00203 | 0.08201 | 2.41                        | -0.30 | 2.89  |
| Pu A | 0.51560              | 0.50180 | 0.08487 | 2.23                        | 3.07  | 0.48  |
| Pu A | 0.00276              | 0.99895 | 0.21951 | 2.18                        | 3.11  | 0.10  |
| Pu A | 0.50158              | 0.49832 | 0.21903 | 2.18                        | 3.11  | 0.06  |
| Pu A | 0.00290              | 0.00112 | 0.35454 | 2.19                        | 3.11  | 0.09  |
| Pu A | 0.50177              | 0.50175 | 0.35500 | 2.16                        | 3.13  | 0.08  |
| Pu A | 0.00531              | 0.99745 | 0.49209 | 3.66                        | -0.51 | 0.86  |
| Pu A | 0.51667              | 0.49827 | 0.48914 | 2.10                        | -3.16 | 0.47  |
| Pu B | 0.98658              | 0.50180 | 0.08487 | 2.23                        | -3.07 | 0.48  |
| Pu B | 0.49842              | 0.00201 | 0.08198 | 2.42                        | 0.30  | 2.88  |
| Pu B | 0.00141              | 0.49832 | 0.21903 | 2.18                        | -3.11 | 0.06  |
| Pu B | 0.50022              | 0.99896 | 0.21951 | 2.19                        | -3.11 | 0.10  |
| Pu B | 0.00174              | 0.50177 | 0.35500 | 2.16                        | -3.13 | 0.08  |
| Pu B | 0.50068              | 0.00113 | 0.35454 | 2.19                        | -3.11 | 0.09  |
| Pu B | 0.98795              | 0.49758 | 0.48917 | -2.09                       | -3.16 | -0.53 |
| Pu B | 0.49923              | 0.99822 | 0.49200 | 2.39                        | -0.36 | 2.90  |
| Pu C | 0.25134              | 0.74714 | 0.15143 | -2.17                       | 0.00  | -3.13 |
| Pu C | 0.75134              | 0.24398 | 0.15189 | -2.24                       | 0.00  | -3.07 |
| Pu C | 0.25167              | 0.74941 | 0.28702 | -2.22                       | 0.00  | -3.09 |
| Pu C | 0.75167              | 0.25023 | 0.28703 | -2.22                       | 0.00  | -3.09 |
| Pu C | 0.25175              | 0.75402 | 0.42363 | -2.17                       | 0.00  | -3.12 |
| Pu C | 0.75171              | 0.24723 | 0.42184 | -2.29                       | -0.02 | -3.04 |
| Pu D | 0.25134              | 0.24599 | 0.15046 | 2.15                        | 0.00  | -3.14 |
| Pu D | 0.75133              | 0.75263 | 0.15220 | 2.13                        | 0.00  | -3.15 |
| Pu D | 0.25168              | 0.25071 | 0.28703 | 2.08                        | 0.00  | -3.18 |
| Pu D | 0.75167              | 0.74992 | 0.28700 | 2.09                        | 0.00  | -3.18 |
| Pu D | 0.25158              | 0.25304 | 0.42261 | 2.04                        | 0.01  | -3.22 |
| Pu D | 0.75177              | 0.75609 | 0.42213 | 2.26                        | -0.03 | -3.06 |
| O    | 0.75129              | 0.03287 | 0.05777 |                             |       |       |
| O    | 0.25130              | 0.09778 | 0.06124 |                             |       |       |
| O    | 0.75107              | 0.49665 | 0.05676 |                             |       |       |
| O    | 0.25129              | 0.49949 | 0.11696 |                             |       |       |
| O    | 0.75135              | 0.99746 | 0.12206 |                             |       |       |
| O    | 0.50716              | 0.74698 | 0.11471 |                             |       |       |
| O    | 0.99774              | 0.25069 | 0.11394 |                             |       |       |
| O    | 0.50480              | 0.25056 | 0.11393 |                             |       |       |
| O    | 0.99532              | 0.74689 | 0.11474 |                             |       |       |
| O    | 0.25117              | 0.99076 | 0.12141 |                             |       |       |
| O    | 0.75113              | 0.49901 | 0.12098 |                             |       |       |
| O    | 0.25140              | 0.49585 | 0.18533 |                             |       |       |
| O    | 0.75140              | 0.99876 | 0.18769 |                             |       |       |
| O    | 0.00310              | 0.24740 | 0.18380 |                             |       |       |
| O    | 0.49966              | 0.74845 | 0.18454 |                             |       |       |
| O    | 0.00310              | 0.74848 | 0.18455 |                             |       |       |
| O    | 0.49969              | 0.24746 | 0.18379 |                             |       |       |

|   |         |         |         |
|---|---------|---------|---------|
| O | 0.25145 | 0.99882 | 0.18652 |
| O | 0.75146 | 0.49728 | 0.18657 |
| O | 0.25160 | 0.49959 | 0.25329 |
| O | 0.75158 | 0.99962 | 0.25386 |
| O | 0.50127 | 0.74865 | 0.25293 |
| O | 0.00199 | 0.24969 | 0.25272 |
| O | 0.50127 | 0.24967 | 0.25271 |
| O | 0.00200 | 0.74863 | 0.25294 |
| O | 0.25156 | 0.99954 | 0.25353 |
| O | 0.75156 | 0.49946 | 0.25317 |
| O | 0.25174 | 0.50056 | 0.32116 |
| O | 0.75177 | 0.00053 | 0.32047 |
| O | 0.00209 | 0.25148 | 0.32110 |
| O | 0.50139 | 0.75043 | 0.32131 |
| O | 0.00211 | 0.75044 | 0.32132 |
| O | 0.50141 | 0.25149 | 0.32110 |
| O | 0.25177 | 0.00058 | 0.32022 |
| O | 0.75176 | 0.50064 | 0.32049 |
| O | 0.25175 | 0.50420 | 0.38914 |
| O | 0.75188 | 0.00130 | 0.38652 |
| O | 0.50006 | 0.75258 | 0.39023 |
| O | 0.00344 | 0.25162 | 0.38948 |
| O | 0.50008 | 0.25160 | 0.38949 |
| O | 0.00359 | 0.75261 | 0.39025 |
| O | 0.25186 | 0.00108 | 0.38737 |
| O | 0.75178 | 0.50273 | 0.38709 |
| O | 0.25194 | 0.50025 | 0.45730 |
| O | 0.75089 | 0.00229 | 0.45188 |
| O | 0.99562 | 0.25285 | 0.45932 |
| O | 0.50520 | 0.74951 | 0.46005 |
| O | 0.99869 | 0.74904 | 0.46019 |
| O | 0.50743 | 0.25300 | 0.45928 |
| O | 0.25075 | 0.00952 | 0.45272 |
| O | 0.75193 | 0.50093 | 0.45289 |
| O | 0.75269 | 0.96767 | 0.51617 |
| O | 0.25300 | 0.90188 | 0.51278 |
| O | 0.75240 | 0.50280 | 0.51714 |
| O | 0.25295 | 0.49669 | 0.52572 |
| O | 0.25093 | 0.50351 | 0.04840 |
| O | 0.40321 | 0.24954 | 0.52493 |
| O | 0.40062 | 0.75091 | 0.04920 |
| O | 0.10410 | 0.24874 | 0.52485 |
| O | 0.10130 | 0.75095 | 0.04922 |
| C | 0.25333 | 0.32598 | 0.52649 |
| C | 0.25096 | 0.67424 | 0.04763 |

**Table S13** - The final minimised structure of the {100}-Stoich-Flat-CO<sub>3</sub> || configuration 1c using PBEsol + U. The ionic positions are given as fractional coordinates and the magnetic vectors are presented.

| Atom | Coordinates (Direct) |          |         | Magnetic Vector ( $\mu_B$ ) |       |       |
|------|----------------------|----------|---------|-----------------------------|-------|-------|
|      | X                    | Y        | Z       | X                           | Y     | Z     |
| Pu A | 0.99580              | 0.00359  | 0.08196 | 3.64                        | -1.06 | -0.26 |
| Pu A | 0.48510              | 0.50227  | 0.08492 | -2.26                       | 3.04  | -0.48 |
| Pu A | 0.99889              | 0.99931  | 0.21949 | 2.18                        | 3.11  | 0.09  |
| Pu A | 0.50007              | 0.49872  | 0.21903 | 2.16                        | 3.12  | 0.08  |
| Pu A | 0.99877              | 0.00077  | 0.35451 | 2.18                        | 3.11  | 0.10  |
| Pu A | 0.49993              | 0.50139  | 0.35498 | 2.18                        | 3.11  | 0.06  |
| Pu A | 0.99787              | -0.00254 | 0.49199 | 2.22                        | -0.39 | 3.02  |
| Pu A | 0.48586              | 0.49685  | 0.48916 | 2.22                        | 3.07  | 0.50  |
| Pu B | 0.01414              | 0.50327  | 0.08485 | -2.24                       | -3.05 | -0.53 |
| Pu B | 0.50208              | 0.00236  | 0.08203 | 2.28                        | -0.47 | 2.97  |
| Pu B | 0.00009              | 0.49870  | 0.21904 | 2.16                        | -3.13 | 0.08  |
| Pu B | 0.50115              | 0.99930  | 0.21949 | 2.18                        | -3.11 | 0.09  |
| Pu B | 0.00006              | 0.50137  | 0.35498 | 2.18                        | -3.11 | 0.06  |
| Pu B | 0.50132              | 0.00076  | 0.35451 | 2.18                        | -3.11 | 0.10  |
| Pu B | 0.01480              | 0.49761  | 0.48909 | 2.23                        | -3.06 | 0.49  |
| Pu B | 0.50367              | -0.00343 | 0.49207 | 3.68                        | -0.76 | 0.54  |
| Pu C | 0.25015              | 0.75363  | 0.15219 | -2.31                       | 0.01  | -3.02 |
| Pu C | 0.75015              | 0.24669  | 0.15041 | -2.17                       | -0.03 | -3.12 |
| Pu C | 0.25003              | 0.74987  | 0.28699 | -2.22                       | 0.00  | -3.09 |
| Pu C | 0.75003              | 0.25069  | 0.28701 | -2.22                       | 0.00  | -3.09 |
| Pu C | 0.24995              | 0.75533  | 0.42209 | -2.25                       | 0.00  | -3.07 |
| Pu C | 0.74980              | 0.25217  | 0.42261 | -2.15                       | 0.01  | -3.14 |
| Pu D | 0.25017              | 0.24472  | 0.15192 | 2.26                        | -0.02 | -3.06 |
| Pu D | 0.75033              | 0.74746  | 0.15140 | 2.05                        | -0.01 | -3.22 |
| Pu D | 0.25004              | 0.25017  | 0.28702 | 2.09                        | 0.00  | -3.18 |
| Pu D | 0.75004              | 0.74939  | 0.28700 | 2.08                        | 0.00  | -3.18 |
| Pu D | 0.24993              | 0.24665  | 0.42180 | 2.13                        | 0.00  | -3.15 |
| Pu D | 0.74992              | 0.75331  | 0.42357 | 2.13                        | -0.01 | -3.15 |
| O    | 0.24955              | 0.49611  | 0.05680 |                             |       |       |
| O    | 0.74798              | 0.09959  | 0.06127 |                             |       |       |
| O    | 0.24868              | 0.03084  | 0.05784 |                             |       |       |
| O    | 0.74880              | 0.50412  | 0.04837 |                             |       |       |
| O    | 0.24991              | 0.50006  | 0.12109 |                             |       |       |
| O    | 0.75162              | 0.99100  | 0.12124 |                             |       |       |
| O    | 0.49432              | 0.74764  | 0.11478 |                             |       |       |
| O    | 0.00314              | 0.25190  | 0.11380 |                             |       |       |
| O    | 0.49658              | 0.25127  | 0.11400 |                             |       |       |
| O    | 0.00652              | 0.74789  | 0.11472 |                             |       |       |
| O    | 0.25126              | 0.99883  | 0.12222 |                             |       |       |
| O    | 0.75002              | 0.50045  | 0.11681 |                             |       |       |
| O    | 0.25008              | 0.49799  | 0.18692 |                             |       |       |
| O    | 0.74993              | 0.99962  | 0.18663 |                             |       |       |
| O    | 0.99828              | 0.24801  | 0.18376 |                             |       |       |
| O    | 0.50185              | 0.74900  | 0.18457 |                             |       |       |
| O    | 0.99839              | 0.74899  | 0.18456 |                             |       |       |

|       |         |         |         |
|-------|---------|---------|---------|
| O     | 0.50183 | 0.24807 | 0.18381 |
| O     | 0.24995 | 0.99944 | 0.18753 |
| O     | 0.75012 | 0.49637 | 0.18492 |
| O     | 0.25005 | 0.49957 | 0.25353 |
| O     | 0.75004 | 0.99964 | 0.25380 |
| O     | 0.50037 | 0.74886 | 0.25294 |
| O     | 0.99966 | 0.24990 | 0.25270 |
| O     | 0.50043 | 0.24990 | 0.25272 |
| O     | 0.99971 | 0.74884 | 0.25293 |
| O     | 0.25001 | 0.99971 | 0.25355 |
| O     | 0.75006 | 0.49969 | 0.25288 |
| O     | 0.25002 | 0.50049 | 0.32083 |
| O     | 0.75003 | 0.00043 | 0.32050 |
| O     | 0.99966 | 0.25121 | 0.32109 |
| O     | 0.50038 | 0.75018 | 0.32132 |
| O     | 0.99967 | 0.75018 | 0.32130 |
| O     | 0.50041 | 0.25122 | 0.32110 |
| O     | 0.25006 | 0.00037 | 0.32014 |
| O     | 0.75001 | 0.50037 | 0.32074 |
| O     | 0.25001 | 0.50215 | 0.38741 |
| O     | 0.75013 | 0.00056 | 0.38756 |
| O     | 0.50179 | 0.75211 | 0.39024 |
| O     | 0.99819 | 0.25104 | 0.38947 |
| O     | 0.50173 | 0.25104 | 0.38948 |
| O     | 0.99824 | 0.75205 | 0.39021 |
| O     | 0.25010 | 0.00063 | 0.38626 |
| O     | 0.74995 | 0.50363 | 0.38871 |
| O     | 0.25008 | 0.50024 | 0.45300 |
| O     | 0.74853 | 0.00864 | 0.45273 |
| O     | 0.00574 | 0.25224 | 0.45925 |
| O     | 0.49675 | 0.74815 | 0.46018 |
| O     | 0.00350 | 0.74882 | 0.46001 |
| O     | 0.49368 | 0.25214 | 0.45934 |
| O     | 0.24906 | 0.00164 | 0.45182 |
| O     | 0.75009 | 0.49962 | 0.45704 |
| O     | 0.25035 | 0.50271 | 0.51722 |
| O     | 0.75177 | 0.90118 | 0.51278 |
| O     | 0.25120 | 0.96722 | 0.51618 |
| O     | 0.75096 | 0.49581 | 0.52558 |
| O     | 0.89715 | 0.75235 | 0.04922 |
| O     | 0.90143 | 0.24884 | 0.52484 |
| O     | 0.59813 | 0.75104 | 0.04916 |
| O     | 0.60232 | 0.24777 | 0.52487 |
| <hr/> |         |         |         |
| C     | 0.74813 | 0.67479 | 0.04759 |
| C     | 0.75147 | 0.32508 | 0.52642 |

**Table S14** - The final minimised structure of the {100}-Redu-Flat-CO<sub>3</sub> || configuration IIa using PBEsol + U. The ionic positions are given as fractional coordinates and the magnetic vectors are presented.

| Atom | Coordinates (Direct) |         |         | Magnetic Vector ( $\mu_B$ ) |       |       |
|------|----------------------|---------|---------|-----------------------------|-------|-------|
|      | X                    | Y       | Z       | X                           | Y     | Z     |
| Pu A | 0.02078              | 0.00938 | 0.08546 | 4.27                        | 1.70  | -1.31 |
| Pu A | 0.48516              | 0.49846 | 0.08749 | 1.44                        | 3.47  | 1.11  |
| Pu A | 0.99800              | 0.00475 | 0.22109 | 2.18                        | 3.11  | 0.07  |
| Pu A | 0.50097              | 0.50580 | 0.22064 | 2.16                        | 3.13  | 0.13  |
| Pu A | 0.99853              | 0.00633 | 0.35651 | 2.15                        | 3.13  | 0.12  |
| Pu A | 0.50174              | 0.50703 | 0.35628 | 2.18                        | 3.11  | 0.07  |
| Pu A | 0.01811              | 0.01635 | 0.49013 | -2.28                       | 3.05  | 0.29  |
| Pu A | 0.47839              | 0.50928 | 0.49201 | 1.86                        | 2.96  | 3.29  |
| Pu B | 0.02489              | 0.49633 | 0.08567 | -0.54                       | -2.63 | 3.97  |
| Pu B | 0.48885              | 0.01248 | 0.08663 | 1.86                        | -3.35 | 0.53  |
| Pu B | 0.99838              | 0.50582 | 0.22089 | 2.15                        | -3.13 | 0.12  |
| Pu B | 0.50135              | 0.00471 | 0.22082 | 2.19                        | -3.10 | 0.06  |
| Pu B | 0.99893              | 0.50703 | 0.35627 | 2.19                        | -3.10 | 0.07  |
| Pu B | 0.50214              | 0.00633 | 0.35652 | 2.16                        | -3.12 | 0.13  |
| Pu B | 0.02365              | 0.50932 | 0.49202 | 1.86                        | -2.96 | 3.29  |
| Pu B | 0.48394              | 0.01636 | 0.49013 | -2.28                       | -3.05 | 0.29  |
| Pu C | 0.24794              | 0.75561 | 0.15389 | -2.27                       | -0.02 | -3.05 |
| Pu C | 0.75089              | 0.25488 | 0.15224 | -2.19                       | 0.02  | -3.11 |
| Pu C | 0.25007              | 0.75615 | 0.28865 | -2.23                       | -0.01 | -3.08 |
| Pu C | 0.74982              | 0.25599 | 0.28861 | -2.23                       | 0.01  | -3.08 |
| Pu C | 0.25070              | 0.75453 | 0.42319 | -2.21                       | 0.00  | -3.09 |
| Pu C | 0.75074              | 0.26143 | 0.42530 | -2.14                       | 0.00  | -3.14 |
| Pu D | 0.24845              | 0.25274 | 0.15528 | 2.19                        | -0.02 | -3.11 |
| Pu D | 0.75125              | 0.75581 | 0.15091 | 2.06                        | -0.03 | -3.20 |
| Pu D | 0.25007              | 0.25588 | 0.28864 | 2.10                        | 0.01  | -3.17 |
| Pu D | 0.74983              | 0.75592 | 0.28862 | 2.08                        | -0.01 | -3.18 |
| Pu D | 0.25070              | 0.25646 | 0.42208 | 2.12                        | 0.00  | -3.15 |
| Pu D | 0.75076              | 0.75697 | 0.42610 | 2.16                        | 0.00  | -3.13 |
| O    | 0.27467              | 0.53401 | 0.05709 |                             |       |       |
| O    | 0.74488              | 0.02241 | 0.04852 |                             |       |       |
| O    | 0.27331              | 0.00867 | 0.05694 |                             |       |       |
| O    | 0.25654              | 0.50250 | 0.12342 |                             |       |       |
| O    | 0.74241              | 0.00887 | 0.11925 |                             |       |       |
| O    | 0.49971              | 0.75617 | 0.11471 |                             |       |       |
| O    | 0.00721              | 0.25460 | 0.11934 |                             |       |       |
| O    | 0.49075              | 0.25464 | 0.11873 |                             |       |       |
| O    | 0.00067              | 0.75308 | 0.11683 |                             |       |       |
| O    | 0.25734              | 0.00415 | 0.12381 |                             |       |       |
| O    | 0.74137              | 0.50272 | 0.11643 |                             |       |       |
| O    | 0.24883              | 0.50543 | 0.18890 |                             |       |       |
| O    | 0.75043              | 0.00388 | 0.18672 |                             |       |       |
| O    | 0.99642              | 0.25479 | 0.18725 |                             |       |       |
| O    | 0.50080              | 0.75501 | 0.18524 |                             |       |       |
| O    | 0.99831              | 0.75527 | 0.18598 |                             |       |       |
| O    | 0.50257              | 0.25481 | 0.18683 |                             |       |       |

|       |         |         |         |
|-------|---------|---------|---------|
| O     | 0.24873 | 0.00362 | 0.18904 |
| O     | 0.75049 | 0.50631 | 0.18557 |
| O     | 0.25015 | 0.50613 | 0.25511 |
| O     | 0.74934 | 0.00548 | 0.25512 |
| O     | 0.50066 | 0.75536 | 0.25430 |
| O     | 0.99911 | 0.25574 | 0.25480 |
| O     | 0.50054 | 0.25568 | 0.25451 |
| O     | 0.99898 | 0.75533 | 0.25466 |
| O     | 0.25014 | 0.00544 | 0.25508 |
| O     | 0.74938 | 0.50599 | 0.25437 |
| O     | 0.25021 | 0.50656 | 0.32224 |
| O     | 0.75015 | 0.00596 | 0.32274 |
| O     | 0.99925 | 0.25609 | 0.32267 |
| O     | 0.50100 | 0.75668 | 0.32268 |
| O     | 0.99915 | 0.75669 | 0.32276 |
| O     | 0.50091 | 0.25610 | 0.32261 |
| O     | 0.25021 | 0.00605 | 0.32223 |
| O     | 0.75014 | 0.50639 | 0.32207 |
| O     | 0.25049 | 0.50724 | 0.38837 |
| O     | 0.75047 | 0.00700 | 0.39132 |
| O     | 0.50127 | 0.75621 | 0.39142 |
| O     | 0.99792 | 0.25780 | 0.39039 |
| O     | 0.50326 | 0.25778 | 0.39035 |
| O     | 0.99992 | 0.75620 | 0.39147 |
| O     | 0.25049 | 0.00532 | 0.38853 |
| O     | 0.75045 | 0.50896 | 0.39044 |
| O     | 0.25096 | 0.50170 | 0.45358 |
| O     | 0.75094 | 0.01381 | 0.45969 |
| O     | 0.00860 | 0.25046 | 0.45851 |
| O     | 0.50085 | 0.76648 | 0.46086 |
| O     | 0.00102 | 0.76650 | 0.46088 |
| O     | 0.49317 | 0.25047 | 0.45849 |
| O     | 0.25097 | 0.00402 | 0.45412 |
| O     | 0.75099 | 0.50912 | 0.45859 |
| O     | 0.25106 | 0.61797 | 0.51771 |
| O     | 0.75114 | 0.01725 | 0.52707 |
| O     | 0.25109 | 0.06245 | 0.51764 |
| O     | 0.89932 | 0.27107 | 0.04868 |
| O     | 0.89909 | 0.26802 | 0.52676 |
| O     | 0.60507 | 0.27653 | 0.05209 |
| O     | 0.60320 | 0.26802 | 0.52673 |
| <hr/> |         |         |         |
| C     | 0.75118 | 0.19282 | 0.04870 |
| C     | 0.75114 | 0.18908 | 0.52804 |

**Table S15** - The final minimised structure of the {100}-Redu-Flat-CO3 // configuration IIb using PBEsol + U. The ionic positions are given as fractional coordinates and the magnetic vectors are presented.

| Atom | Coordinates (Direct) |         |         | Magnetic Vector ( $\mu_B$ ) |       |       |
|------|----------------------|---------|---------|-----------------------------|-------|-------|
|      | X                    | Y       | Z       | X                           | Y     | Z     |
| Pu A | 0.02047              | 0.00060 | 0.08286 | 1.63                        | 2.33  | 3.88  |
| Pu A | 0.47860              | 0.49427 | 0.08604 | 1.25                        | 3.63  | 0.05  |
| Pu A | 0.99837              | 0.00515 | 0.21951 | 2.18                        | 3.11  | 0.07  |
| Pu A | 0.50158              | 0.50621 | 0.21891 | 2.13                        | 3.14  | 0.12  |
| Pu A | 0.99849              | 0.00314 | 0.35458 | 2.15                        | 3.13  | 0.12  |
| Pu A | 0.50149              | 0.50394 | 0.35481 | 2.17                        | 3.12  | 0.06  |
| Pu A | 0.02519              | 0.00466 | 0.49142 | 2.36                        | -1.64 | -3.85 |
| Pu A | 0.47116              | 0.49741 | 0.49044 | 2.54                        | 2.20  | 3.42  |
| Pu B | 0.02172              | 0.49427 | 0.08603 | 1.25                        | -3.63 | 0.05  |
| Pu B | 0.47985              | 0.00060 | 0.08286 | 1.63                        | -2.33 | 3.88  |
| Pu B | 0.99874              | 0.50620 | 0.21891 | 2.13                        | -3.14 | 0.12  |
| Pu B | 0.50196              | 0.00515 | 0.21951 | 2.18                        | -3.11 | 0.07  |
| Pu B | 0.99899              | 0.50394 | 0.35482 | 2.18                        | -3.11 | 0.06  |
| Pu B | 0.50175              | 0.00295 | 0.35462 | 2.17                        | -3.12 | 0.13  |
| Pu B | 0.01037              | 0.49220 | 0.48741 | -1.37                       | -3.52 | 1.05  |
| Pu B | 0.49171              | 0.00888 | 0.48802 | -1.25                       | -3.59 | 0.70  |
| Pu C | 0.25015              | 0.76164 | 0.15247 | -2.24                       | 0.00  | -3.07 |
| Pu C | 0.75015              | 0.25155 | 0.15011 | -2.09                       | 0.00  | -3.18 |
| Pu C | 0.25018              | 0.75420 | 0.28697 | -2.24                       | 0.00  | -3.07 |
| Pu C | 0.75016              | 0.25496 | 0.28694 | -2.25                       | 0.00  | -3.06 |
| Pu C | 0.25002              | 0.75357 | 0.42167 | -2.29                       | 0.05  | -3.03 |
| Pu C | 0.75011              | 0.25196 | 0.42329 | -2.21                       | -0.04 | -3.10 |
| Pu D | 0.25015              | 0.25490 | 0.15388 | 2.08                        | 0.00  | -3.18 |
| Pu D | 0.75016              | 0.75852 | 0.14933 | 2.07                        | 0.00  | -3.19 |
| Pu D | 0.25021              | 0.25484 | 0.28695 | 2.08                        | 0.00  | -3.18 |
| Pu D | 0.75019              | 0.75416 | 0.28698 | 2.07                        | 0.00  | -3.19 |
| Pu D | 0.25023              | 0.25099 | 0.42039 | 2.19                        | 0.00  | -3.11 |
| Pu D | 0.75064              | 0.75356 | 0.42449 | 2.08                        | -0.04 | -3.18 |
| O    | 0.25017              | 0.43284 | 0.05868 |                             |       |       |
| O    | 0.25016              | 0.87250 | 0.06015 |                             |       |       |
| O    | 0.25015              | 0.51036 | 0.12171 |                             |       |       |
| O    | 0.75018              | 0.00686 | 0.11798 |                             |       |       |
| O    | 0.50131              | 0.74808 | 0.11550 |                             |       |       |
| O    | 0.00780              | 0.26360 | 0.11748 |                             |       |       |
| O    | 0.49251              | 0.26360 | 0.11748 |                             |       |       |
| O    | 0.99900              | 0.74807 | 0.11550 |                             |       |       |
| O    | 0.25017              | 0.01274 | 0.12250 |                             |       |       |
| O    | 0.75015              | 0.50133 | 0.11132 |                             |       |       |
| O    | 0.25015              | 0.50767 | 0.18706 |                             |       |       |
| O    | 0.75015              | 0.00487 | 0.18520 |                             |       |       |
| O    | 0.99691              | 0.25490 | 0.18539 |                             |       |       |
| O    | 0.50079              | 0.75714 | 0.18455 |                             |       |       |
| O    | 0.99953              | 0.75714 | 0.18455 |                             |       |       |
| O    | 0.50338              | 0.25491 | 0.18539 |                             |       |       |
| O    | 0.25016              | 0.00653 | 0.18761 |                             |       |       |



|   |         |         |         |
|---|---------|---------|---------|
| O | 0.75016 | 0.50629 | 0.18280 |
| O | 0.25019 | 0.50532 | 0.25326 |
| O | 0.75019 | 0.00479 | 0.25353 |
| O | 0.50117 | 0.75459 | 0.25303 |
| O | 0.99939 | 0.25598 | 0.25302 |
| O | 0.50098 | 0.25597 | 0.25303 |
| O | 0.99920 | 0.75457 | 0.25303 |
| O | 0.25017 | 0.00459 | 0.25348 |
| O | 0.75016 | 0.50538 | 0.25240 |
| O | 0.25011 | 0.50439 | 0.32069 |
| O | 0.75000 | 0.00393 | 0.32080 |
| O | 0.99943 | 0.25404 | 0.32094 |
| O | 0.50107 | 0.75342 | 0.32119 |
| O | 0.99931 | 0.75360 | 0.32117 |
| O | 0.50097 | 0.25414 | 0.32096 |
| O | 0.25036 | 0.00387 | 0.32032 |
| O | 0.75034 | 0.50431 | 0.32063 |
| O | 0.25077 | 0.50385 | 0.38690 |
| O | 0.75079 | 0.00178 | 0.38906 |
| O | 0.50146 | 0.75358 | 0.39000 |
| O | 0.99705 | 0.25345 | 0.38853 |
| O | 0.50322 | 0.25252 | 0.38853 |
| O | 0.99896 | 0.75299 | 0.38995 |
| O | 0.24950 | 0.00179 | 0.38640 |
| O | 0.74979 | 0.50449 | 0.38950 |
| O | 0.24324 | 0.50115 | 0.45223 |
| O | 0.74447 | 0.00613 | 0.45635 |
| O | 0.00800 | 0.24918 | 0.45657 |
| O | 0.49984 | 0.75227 | 0.45974 |
| O | 0.00096 | 0.75230 | 0.45966 |
| O | 0.49181 | 0.25503 | 0.45655 |
| O | 0.25678 | 0.00309 | 0.45184 |
| O | 0.75568 | 0.49996 | 0.45872 |
| O | 0.21824 | 0.51619 | 0.51871 |
| O | 0.27993 | 0.98273 | 0.51856 |
| O | 0.74832 | 0.01683 | 0.52698 |
| O | 0.75016 | 0.03202 | 0.04523 |
| O | 0.89447 | 0.27003 | 0.52509 |
| O | 0.89750 | 0.28302 | 0.04912 |
| O | 0.59957 | 0.26625 | 0.52458 |
| O | 0.60286 | 0.28304 | 0.04912 |
| C | 0.74783 | 0.18732 | 0.52662 |
| C | 0.75017 | 0.20081 | 0.04706 |

**Table S16** - The final minimised structure of the {100}-Redu-Flat-CO3 // configuration IIc using PBEsol + U. The ionic positions are given as fractional coordinates and the magnetic vectors are presented.

| Atom | Coordinates (Direct) |         |         | Magnetic Vector ( $\mu_B$ ) |       |       |
|------|----------------------|---------|---------|-----------------------------|-------|-------|
|      | X                    | Y       | Z       | X                           | Y     | Z     |
| Pu A | 0.99857              | 0.00630 | 0.08539 | 1.63                        | 2.33  | 3.88  |
| Pu A | 0.45880              | 0.49950 | 0.08355 | 1.25                        | 3.63  | 0.05  |
| Pu A | 0.98034              | 0.99597 | 0.21897 | 2.18                        | 3.11  | 0.07  |
| Pu A | 0.48364              | 0.49669 | 0.21923 | 2.13                        | 3.14  | 0.12  |
| Pu A | 0.98146              | 0.99539 | 0.35472 | 2.15                        | 3.13  | 0.12  |
| Pu A | 0.48467              | 0.49610 | 0.35446 | 2.17                        | 3.12  | 0.06  |
| Pu A | 0.00140              | 0.00403 | 0.48828 | 2.36                        | -1.64 | -3.85 |
| Pu A | 0.46172              | 0.49690 | 0.49021 | 2.54                        | 2.20  | 3.42  |
| Pu B | 0.00442              | 0.49946 | 0.08356 | 1.25                        | -3.63 | 0.05  |
| Pu B | 0.46415              | 0.00631 | 0.08538 | 1.63                        | -2.33 | 3.88  |
| Pu B | 0.98064              | 0.49669 | 0.21923 | 2.13                        | -3.14 | 0.12  |
| Pu B | 0.48395              | 0.99597 | 0.21897 | 2.18                        | -3.11 | 0.07  |
| Pu B | 0.98185              | 0.49612 | 0.35446 | 2.18                        | -3.11 | 0.06  |
| Pu B | 0.48505              | 0.99539 | 0.35472 | 2.17                        | -3.12 | 0.13  |
| Pu B | 0.00683              | 0.49677 | 0.49022 | -1.37                       | -3.52 | 1.05  |
| Pu B | 0.46731              | 0.00420 | 0.48828 | -1.25                       | -3.59 | 0.70  |
| Pu C | 0.23179              | 0.74418 | 0.15234 | -2.24                       | 0.00  | -3.07 |
| Pu C | 0.73173              | 0.25136 | 0.15017 | -2.09                       | 0.00  | -3.18 |
| Pu C | 0.23266              | 0.74638 | 0.28684 | -2.24                       | 0.00  | -3.07 |
| Pu C | 0.73265              | 0.24577 | 0.28685 | -2.25                       | 0.00  | -3.06 |
| Pu C | 0.23382              | 0.74268 | 0.42137 | -2.29                       | 0.05  | -3.03 |
| Pu C | 0.73391              | 0.24972 | 0.42348 | -2.21                       | -0.04 | -3.10 |
| Pu D | 0.23176              | 0.24603 | 0.15347 | 2.08                        | 0.00  | -3.18 |
| Pu D | 0.73176              | 0.74651 | 0.14940 | 2.07                        | 0.00  | -3.19 |
| Pu D | 0.23266              | 0.24568 | 0.28684 | 2.08                        | 0.00  | -3.18 |
| Pu D | 0.73266              | 0.74614 | 0.28685 | 2.07                        | 0.00  | -3.19 |
| Pu D | 0.23387              | 0.24476 | 0.42026 | 2.19                        | 0.00  | -3.11 |
| Pu D | 0.73390              | 0.74509 | 0.42429 | 2.08                        | -0.04 | -3.18 |
| O    | 0.23156              | 0.61115 | 0.05812 |                             |       |       |
| O    | 0.73134              | 0.00746 | 0.04850 |                             |       |       |
| O    | 0.23129              | 0.05445 | 0.05791 |                             |       |       |
| O    | 0.23157              | 0.49118 | 0.12202 |                             |       |       |
| O    | 0.73152              | 0.00353 | 0.11598 |                             |       |       |
| O    | 0.48169              | 0.75638 | 0.11471 |                             |       |       |
| O    | 0.98939              | 0.24033 | 0.11703 |                             |       |       |
| O    | 0.47378              | 0.24031 | 0.11702 |                             |       |       |
| O    | 0.98160              | 0.75634 | 0.11473 |                             |       |       |
| O    | 0.23149              | 0.99357 | 0.12128 |                             |       |       |
| O    | 0.73156              | 0.49865 | 0.11667 |                             |       |       |
| O    | 0.23198              | 0.49655 | 0.18735 |                             |       |       |
| O    | 0.73196              | 0.99625 | 0.18451 |                             |       |       |
| O    | 0.97909              | 0.24727 | 0.18514 |                             |       |       |
| O    | 0.48253              | 0.74572 | 0.18407 |                             |       |       |
| O    | 0.98128              | 0.74572 | 0.18408 |                             |       |       |
| O    | 0.48465              | 0.24728 | 0.18514 |                             |       |       |

|       |         |         |         |
|-------|---------|---------|---------|
| O     | 0.23199 | 0.99474 | 0.18672 |
| O     | 0.73196 | 0.49838 | 0.18471 |
| O     | 0.23231 | 0.49643 | 0.25351 |
| O     | 0.73230 | 0.99585 | 0.25312 |
| O     | 0.48335 | 0.74656 | 0.25276 |
| O     | 0.98172 | 0.24590 | 0.25286 |
| O     | 0.48322 | 0.24591 | 0.25285 |
| O     | 0.98159 | 0.74656 | 0.25276 |
| O     | 0.23232 | 0.99590 | 0.25300 |
| O     | 0.73230 | 0.49624 | 0.25297 |
| O     | 0.23299 | 0.49613 | 0.32046 |
| O     | 0.73300 | 0.99556 | 0.32092 |
| O     | 0.98213 | 0.24544 | 0.32083 |
| O     | 0.48372 | 0.74618 | 0.32096 |
| O     | 0.98203 | 0.74616 | 0.32096 |
| O     | 0.48360 | 0.24541 | 0.32083 |
| O     | 0.23296 | 0.99565 | 0.32036 |
| O     | 0.73297 | 0.49594 | 0.32038 |
| O     | 0.23344 | 0.49571 | 0.38658 |
| O     | 0.73347 | 0.99543 | 0.38950 |
| O     | 0.48433 | 0.74494 | 0.38966 |
| O     | 0.98102 | 0.24652 | 0.38856 |
| O     | 0.48638 | 0.24652 | 0.38855 |
| O     | 0.98298 | 0.74497 | 0.38966 |
| O     | 0.23345 | 0.99378 | 0.38668 |
| O     | 0.73349 | 0.49748 | 0.38867 |
| O     | 0.23419 | 0.48987 | 0.45178 |
| O     | 0.73419 | 0.00178 | 0.45785 |
| O     | 0.99190 | 0.23836 | 0.45667 |
| O     | 0.48398 | 0.75437 | 0.45910 |
| O     | 0.98434 | 0.75431 | 0.45910 |
| O     | 0.47640 | 0.23850 | 0.45666 |
| O     | 0.23422 | 0.99217 | 0.45228 |
| O     | 0.73421 | 0.49707 | 0.45676 |
| O     | 0.23423 | 0.60332 | 0.51613 |
| O     | 0.73427 | 0.00442 | 0.52526 |
| O     | 0.23440 | 0.04854 | 0.51588 |
| O     | 0.87908 | 0.25837 | 0.04885 |
| O     | 0.88270 | 0.25493 | 0.52491 |
| O     | 0.58316 | 0.25810 | 0.04879 |
| O     | 0.58681 | 0.25551 | 0.52487 |
| <hr/> |         |         |         |
| C     | 0.73121 | 0.17934 | 0.04754 |
| C     | 0.73457 | 0.17622 | 0.52620 |

**Table S17** - The final minimised structure of the {100}-Redu-Flat-CO3 // configuration IId using PBEsol + U. The ionic positions are given as fractional coordinates and the magnetic vectors are presented.

| Atom | Coordinates (Direct) |         |         | Magnetic Vector ( $\mu_B$ ) |       |       |
|------|----------------------|---------|---------|-----------------------------|-------|-------|
|      | X                    | Y       | Z       | X                           | Y     | Z     |
| Pu A | 0.02007              | 0.01500 | 0.08348 | 2.20                        | -0.47 | 3.03  |
| Pu A | 0.50622              | 0.50033 | 0.08556 | 3.83                        | -2.80 | 0.71  |
| Pu A | 0.01490              | 0.99889 | 0.21956 | 2.19                        | 3.11  | 0.07  |
| Pu A | 0.51602              | 0.49915 | 0.21900 | 2.16                        | 3.12  | 0.09  |
| Pu A | 0.01482              | 0.00117 | 0.35448 | 2.19                        | 3.11  | 0.07  |
| Pu A | 0.51600              | 0.50088 | 0.35503 | 2.17                        | 3.12  | 0.10  |
| Pu A | 0.02027              | 0.98494 | 0.49080 | 2.17                        | 0.62  | 3.03  |
| Pu A | 0.50596              | 0.49902 | 0.48859 | 3.87                        | 2.76  | 0.66  |
| Pu B | 0.02516              | 0.50063 | 0.08557 | -3.81                       | -2.84 | -0.66 |
| Pu B | 0.51133              | 0.01491 | 0.08350 | 2.48                        | 0.24  | 2.84  |
| Pu B | 0.01533              | 0.49916 | 0.21899 | 2.16                        | -3.12 | 0.09  |
| Pu B | 0.51646              | 0.99889 | 0.21956 | 2.19                        | -3.11 | 0.07  |
| Pu B | 0.01543              | 0.50087 | 0.35501 | 2.17                        | -3.12 | 0.10  |
| Pu B | 0.51656              | 0.00120 | 0.35450 | 2.19                        | -3.11 | 0.07  |
| Pu B | 0.02471              | 0.50040 | 0.48843 | 3.86                        | -2.75 | 0.75  |
| Pu B | 0.51187              | 0.98465 | 0.49002 | 2.77                        | 2.57  | -0.46 |
| Pu C | 0.26566              | 0.75116 | 0.15196 | -2.15                       | -0.03 | -3.14 |
| Pu C | 0.76559              | 0.24700 | 0.15141 | -2.21                       | 0.00  | -3.10 |
| Pu C | 0.26569              | 0.74968 | 0.28701 | -2.22                       | 0.00  | -3.09 |
| Pu C | 0.76567              | 0.25054 | 0.28702 | -2.22                       | 0.00  | -3.08 |
| Pu C | 0.26559              | 0.75504 | 0.42189 | -2.20                       | 0.03  | -3.10 |
| Pu C | 0.76603              | 0.24951 | 0.42347 | -2.23                       | -0.01 | -3.08 |
| Pu D | 0.26560              | 0.24511 | 0.15221 | 2.21                        | -0.04 | -3.09 |
| Pu D | 0.76564              | 0.75052 | 0.15058 | 2.05                        | 0.00  | -3.21 |
| Pu D | 0.26569              | 0.25038 | 0.28703 | 2.09                        | 0.00  | -3.17 |
| Pu D | 0.76567              | 0.74949 | 0.28700 | 2.09                        | 0.00  | -3.17 |
| Pu D | 0.26584              | 0.24929 | 0.42210 | 2.06                        | 0.01  | -3.21 |
| Pu D | 0.76579              | 0.75272 | 0.42251 | 2.22                        | 0.02  | -3.09 |
| O    | 0.11592              | 0.77624 | 0.04791 |                             |       |       |
| O    | 0.76559              | 0.08851 | 0.05987 |                             |       |       |
| O    | 0.26538              | 0.13540 | 0.06439 |                             |       |       |
| O    | 0.26559              | 0.50012 | 0.11801 |                             |       |       |
| O    | 0.76543              | 0.99703 | 0.12102 |                             |       |       |
| O    | 0.51661              | 0.75410 | 0.11487 |                             |       |       |
| O    | 0.01526              | 0.24912 | 0.11758 |                             |       |       |
| O    | 0.51583              | 0.24931 | 0.11759 |                             |       |       |
| O    | 0.01471              | 0.75435 | 0.11493 |                             |       |       |
| O    | 0.26593              | 0.99335 | 0.12140 |                             |       |       |
| O    | 0.76573              | 0.49979 | 0.11495 |                             |       |       |
| O    | 0.26569              | 0.49764 | 0.18563 |                             |       |       |
| O    | 0.76569              | 0.99882 | 0.18665 |                             |       |       |
| O    | 0.01595              | 0.24832 | 0.18527 |                             |       |       |
| O    | 0.51556              | 0.74879 | 0.18452 |                             |       |       |
| O    | 0.01572              | 0.74873 | 0.18453 |                             |       |       |
| O    | 0.51531              | 0.24828 | 0.18527 |                             |       |       |

|       |         |         |         |
|-------|---------|---------|---------|
| O     | 0.26564 | 0.99873 | 0.18675 |
| O     | 0.76567 | 0.49840 | 0.18452 |
| O     | 0.26573 | 0.49973 | 0.25319 |
| O     | 0.76572 | 0.99961 | 0.25376 |
| O     | 0.51594 | 0.74865 | 0.25289 |
| O     | 0.01542 | 0.25004 | 0.25314 |
| O     | 0.51598 | 0.25006 | 0.25313 |
| O     | 0.01547 | 0.74868 | 0.25288 |
| O     | 0.26574 | 0.99954 | 0.25346 |
| O     | 0.76574 | 0.49966 | 0.25273 |
| O     | 0.26577 | 0.50029 | 0.32120 |
| O     | 0.76564 | 0.00044 | 0.32056 |
| O     | 0.01544 | 0.25131 | 0.32113 |
| O     | 0.51592 | 0.75002 | 0.32090 |
| O     | 0.01545 | 0.75003 | 0.32087 |
| O     | 0.51593 | 0.25136 | 0.32115 |
| O     | 0.26580 | 0.00047 | 0.32035 |
| O     | 0.76569 | 0.50038 | 0.32092 |
| O     | 0.26574 | 0.50255 | 0.38879 |
| O     | 0.76592 | 0.00141 | 0.38756 |
| O     | 0.51528 | 0.75192 | 0.38876 |
| O     | 0.01593 | 0.25141 | 0.38949 |
| O     | 0.51566 | 0.25126 | 0.38950 |
| O     | 0.01600 | 0.75162 | 0.38871 |
| O     | 0.26542 | 0.00117 | 0.38723 |
| O     | 0.76575 | 0.50155 | 0.38907 |
| O     | 0.26555 | 0.49955 | 0.45628 |
| O     | 0.76411 | 0.00242 | 0.45303 |
| O     | 0.01467 | 0.24563 | 0.45907 |
| O     | 0.51531 | 0.74964 | 0.45641 |
| O     | 0.01519 | 0.75168 | 0.45626 |
| O     | 0.51774 | 0.24661 | 0.45905 |
| O     | 0.26849 | 0.00748 | 0.45287 |
| O     | 0.76562 | 0.50084 | 0.45879 |
| O     | 0.11228 | 0.22488 | 0.52630 |
| O     | 0.76516 | 0.91306 | 0.51430 |
| O     | 0.26261 | 0.86224 | 0.50947 |
| O     | 0.26592 | 0.52911 | 0.04331 |
| O     | 0.41106 | 0.22140 | 0.52582 |
| O     | 0.41511 | 0.77676 | 0.04786 |
| O     | 0.26474 | 0.47066 | 0.53067 |
| <hr/> |         |         |         |
| C     | 0.26568 | 0.69921 | 0.04520 |
| C     | 0.26288 | 0.30059 | 0.52878 |

**Table S18** - The final minimised structure of the  $\{100\}$ -Redu- $\text{CO}_3 \perp$  configuration IIIa using PBEsol + U. The ionic positions are given as fractional coordinates and the magnetic vectors are presented.

| Atom | Coordinates (Direct) |          |         | Magnetic Vector ( $\mu_B$ ) |       |       |
|------|----------------------|----------|---------|-----------------------------|-------|-------|
|      | X                    | Y        | Z       | X                           | Y     | Z     |
| Pu A | 0.99888              | -0.00003 | 0.08402 | 3.56                        | 1.38  | 0.00  |
| Pu A | 0.48281              | 0.49997  | 0.08539 | 3.49                        | -3.27 | -0.10 |
| Pu A | 0.99259              | 0.00041  | 0.21945 | 2.18                        | 3.11  | 0.08  |
| Pu A | 0.49367              | 0.50042  | 0.21911 | 2.16                        | 3.13  | 0.08  |
| Pu A | 0.99256              | 0.00030  | 0.35460 | 2.19                        | 3.11  | 0.08  |
| Pu A | 0.49365              | 0.50027  | 0.35491 | 2.18                        | 3.11  | 0.08  |
| Pu A | 0.99869              | 0.00004  | 0.49014 | 3.57                        | -1.37 | -0.04 |
| Pu A | 0.48285              | 0.50021  | 0.48902 | 0.93                        | 4.69  | -0.15 |
| Pu B | 0.00461              | 0.50049  | 0.08494 | -2.60                       | -1.47 | -3.74 |
| Pu B | 0.49786              | 0.99928  | 0.08369 | 3.62                        | 1.25  | -0.05 |
| Pu B | 0.99329              | 0.50038  | 0.21909 | 2.17                        | -3.12 | 0.08  |
| Pu B | 0.49436              | 0.00039  | 0.21945 | 2.18                        | -3.11 | 0.08  |
| Pu B | 0.99343              | 0.50027  | 0.35496 | 2.17                        | -3.12 | 0.08  |
| Pu B | 0.49454              | 0.00029  | 0.35457 | 2.18                        | -3.11 | 0.08  |
| Pu B | 0.00407              | 0.50023  | 0.48890 | 3.83                        | -2.88 | 0.11  |
| Pu B | 0.49720              | 0.00002  | 0.49016 | 3.60                        | -1.28 | 0.03  |
| Pu C | 0.24296              | 0.75301  | 0.15199 | -2.31                       | -0.02 | -3.02 |
| Pu C | 0.74297              | 0.25056  | 0.15098 | -2.18                       | 0.01  | -3.12 |
| Pu C | 0.24355              | 0.75027  | 0.28702 | -2.23                       | 0.00  | -3.08 |
| Pu C | 0.74358              | 0.25074  | 0.28701 | -2.23                       | 0.00  | -3.08 |
| Pu C | 0.24318              | 0.75256  | 0.42206 | -2.18                       | 0.00  | -3.12 |
| Pu C | 0.74297              | 0.25027  | 0.42302 | -2.33                       | 0.05  | -3.01 |
| Pu D | 0.24298              | 0.24802  | 0.15200 | 2.26                        | -0.05 | -3.06 |
| Pu D | 0.74309              | 0.75013  | 0.15104 | 2.12                        | 0.01  | -3.16 |
| Pu D | 0.24355              | 0.25043  | 0.28702 | 2.08                        | 0.00  | -3.18 |
| Pu D | 0.74358              | 0.74996  | 0.28701 | 2.08                        | 0.00  | -3.18 |
| Pu D | 0.24325              | 0.24806  | 0.42207 | 2.16                        | -0.02 | -3.14 |
| Pu D | 0.74293              | 0.75009  | 0.42298 | 2.22                        | -0.03 | -3.09 |
| O    | 0.74831              | 0.99693  | 0.05780 |                             |       |       |
| O    | 0.24759              | 0.99356  | 0.05808 |                             |       |       |
| O    | 0.23637              | 0.50030  | 0.12018 |                             |       |       |
| O    | 0.74419              | 0.00025  | 0.12187 |                             |       |       |
| O    | 0.49162              | 0.75750  | 0.11461 |                             |       |       |
| O    | 0.99401              | 0.24641  | 0.11387 |                             |       |       |
| O    | 0.49161              | 0.24256  | 0.11441 |                             |       |       |
| O    | 0.99422              | 0.75475  | 0.11392 |                             |       |       |
| O    | 0.23973              | 0.00076  | 0.12230 |                             |       |       |
| O    | 0.74445              | 0.50014  | 0.11747 |                             |       |       |
| O    | 0.24367              | 0.50054  | 0.18662 |                             |       |       |
| O    | 0.74340              | 0.00037  | 0.18702 |                             |       |       |
| O    | 0.99272              | 0.25044  | 0.18408 |                             |       |       |
| O    | 0.49377              | 0.75013  | 0.18420 |                             |       |       |
| O    | 0.99277              | 0.75036  | 0.18410 |                             |       |       |
| O    | 0.49379              | 0.25071  | 0.18416 |                             |       |       |
| O    | 0.24369              | 0.00037  | 0.18725 |                             |       |       |

|       |         |         |         |
|-------|---------|---------|---------|
| O     | 0.74342 | 0.50036 | 0.18541 |
| O     | 0.24345 | 0.50040 | 0.25350 |
| O     | 0.74367 | 0.00042 | 0.25385 |
| O     | 0.49377 | 0.75006 | 0.25284 |
| O     | 0.99327 | 0.25085 | 0.25279 |
| O     | 0.49379 | 0.25078 | 0.25284 |
| O     | 0.99329 | 0.74998 | 0.25279 |
| O     | 0.24344 | 0.00041 | 0.25351 |
| O     | 0.74364 | 0.50040 | 0.25298 |
| O     | 0.24346 | 0.50030 | 0.32089 |
| O     | 0.74370 | 0.00032 | 0.32049 |
| O     | 0.99330 | 0.25066 | 0.32127 |
| O     | 0.49380 | 0.74993 | 0.32119 |
| O     | 0.99332 | 0.74990 | 0.32127 |
| O     | 0.49382 | 0.25064 | 0.32120 |
| O     | 0.24349 | 0.00030 | 0.32020 |
| O     | 0.74373 | 0.50030 | 0.32063 |
| O     | 0.24382 | 0.50036 | 0.38776 |
| O     | 0.74349 | 0.00030 | 0.38723 |
| O     | 0.49381 | 0.75002 | 0.38983 |
| O     | 0.99288 | 0.25042 | 0.39001 |
| O     | 0.49385 | 0.25055 | 0.38985 |
| O     | 0.99290 | 0.75016 | 0.38998 |
| O     | 0.24375 | 0.00028 | 0.38657 |
| O     | 0.74342 | 0.50023 | 0.38820 |
| O     | 0.23685 | 0.50035 | 0.45404 |
| O     | 0.74369 | 0.00016 | 0.45218 |
| O     | 0.99413 | 0.24546 | 0.46025 |
| O     | 0.49167 | 0.75728 | 0.45944 |
| O     | 0.99419 | 0.75502 | 0.46017 |
| O     | 0.49171 | 0.24313 | 0.45950 |
| O     | 0.24035 | 0.00047 | 0.45174 |
| O     | 0.74479 | 0.50026 | 0.45630 |
| O     | 0.74759 | 0.99991 | 0.51619 |
| O     | 0.24744 | 0.99834 | 0.51601 |
| O     | 0.22736 | 0.49799 | 0.52542 |
| O     | 0.22770 | 0.49283 | 0.04866 |
| O     | 0.49869 | 0.50055 | 0.54544 |
| O     | 0.49973 | 0.49968 | 0.02885 |
| O     | 0.26883 | 0.50020 | 0.58205 |
| O     | 0.27049 | 0.50013 | 0.99210 |
| <hr/> |         |         |         |
| C     | 0.33256 | 0.49967 | 0.55452 |
| C     | 0.33428 | 0.49788 | 0.01962 |

**Table S19** - The final minimised structure of the  $\{100\}$ -Redu-CO<sub>2</sub>  $\perp$  configuration IVa using PBEsol + U. The ionic positions are given as fractional coordinates and the magnetic vectors are presented.

| Atom | Coordinates (Direct) |         |         | Magnetic Vector ( $\mu_B$ ) |       |       |
|------|----------------------|---------|---------|-----------------------------|-------|-------|
|      | X                    | Y       | Z       | X                           | Y     | Z     |
| Pu A | 0.00242              | 0.00000 | 0.08450 | 3.78                        | 0.64  | -0.02 |
| Pu A | 0.47893              | 0.49968 | 0.08415 | -2.27                       | 1.22  | -4.04 |
| Pu A | 0.99845              | 0.00004 | 0.21929 | 2.18                        | 3.11  | 0.08  |
| Pu A | 0.50038              | 0.50009 | 0.21921 | 2.16                        | 3.12  | 0.08  |
| Pu A | 0.99832              | 0.00019 | 0.35470 | 2.19                        | 3.11  | 0.08  |
| Pu A | 0.50027              | 0.50017 | 0.35477 | 2.18                        | 3.11  | 0.08  |
| Pu A | 0.00145              | 0.99996 | 0.48954 | 3.85                        | 0.13  | 0.01  |
| Pu A | 0.47891              | 0.50052 | 0.48983 | 3.40                        | 2.12  | -2.62 |
| Pu B | 0.02068              | 0.49956 | 0.08421 | -2.74                       | -1.56 | -3.62 |
| Pu B | 0.49902              | 0.00010 | 0.08450 | 3.83                        | 0.19  | -0.11 |
| Pu B | 0.99974              | 0.50009 | 0.21921 | 2.16                        | -3.13 | 0.08  |
| Pu B | 0.50169              | 0.00004 | 0.21929 | 2.18                        | -3.12 | 0.07  |
| Pu B | 0.99982              | 0.50020 | 0.35478 | 2.18                        | -3.11 | 0.08  |
| Pu B | 0.50175              | 0.00022 | 0.35469 | 2.18                        | -3.11 | 0.08  |
| Pu B | 0.02026              | 0.50056 | 0.48988 | 4.26                        | -2.00 | 0.91  |
| Pu B | 0.49796              | 0.00024 | 0.48947 | 3.84                        | 0.08  | -0.07 |
| Pu C | 0.25004              | 0.75226 | 0.15222 | -2.31                       | -0.02 | -3.02 |
| Pu C | 0.74998              | 0.25272 | 0.15065 | -2.26                       | 0.00  | -3.06 |
| Pu C | 0.25004              | 0.75043 | 0.28698 | -2.23                       | 0.00  | -3.08 |
| Pu C | 0.75005              | 0.25043 | 0.28699 | -2.23                       | 0.00  | -3.08 |
| Pu C | 0.25013              | 0.75228 | 0.42169 | -2.22                       | 0.00  | -3.09 |
| Pu C | 0.75003              | 0.25293 | 0.42338 | -2.32                       | 0.00  | -3.01 |
| Pu D | 0.25007              | 0.24799 | 0.15234 | 2.22                        | 0.00  | -3.09 |
| Pu D | 0.75002              | 0.74695 | 0.15059 | 2.16                        | 0.00  | -3.13 |
| Pu D | 0.25004              | 0.24984 | 0.28699 | 2.08                        | 0.00  | -3.18 |
| Pu D | 0.75005              | 0.74985 | 0.28699 | 2.08                        | 0.00  | -3.18 |
| Pu D | 0.25004              | 0.24839 | 0.42172 | 2.19                        | -0.01 | -3.12 |
| Pu D | 0.74997              | 0.74771 | 0.42331 | 2.23                        | -0.01 | -3.09 |
| O    | 0.24981              | 0.49170 | 0.05237 |                             |       |       |
| O    | 0.75034              | 0.99904 | 0.05670 |                             |       |       |
| O    | 0.25043              | 0.99379 | 0.05745 |                             |       |       |
| O    | 0.24996              | 0.49976 | 0.12148 |                             |       |       |
| O    | 0.74985              | 0.99975 | 0.12111 |                             |       |       |
| O    | 0.49725              | 0.75487 | 0.11382 |                             |       |       |
| O    | 0.00278              | 0.24513 | 0.11410 |                             |       |       |
| O    | 0.49726              | 0.24518 | 0.11414 |                             |       |       |
| O    | 0.00281              | 0.75496 | 0.11384 |                             |       |       |
| O    | 0.24977              | 0.00045 | 0.12185 |                             |       |       |
| O    | 0.75014              | 0.49917 | 0.11793 |                             |       |       |
| O    | 0.25007              | 0.50025 | 0.18709 |                             |       |       |
| O    | 0.75010              | 0.99971 | 0.18666 |                             |       |       |
| O    | 0.99926              | 0.25044 | 0.18411 |                             |       |       |
| O    | 0.50083              | 0.74955 | 0.18393 |                             |       |       |
| O    | 0.99930              | 0.74955 | 0.18394 |                             |       |       |
| O    | 0.50087              | 0.25044 | 0.18412 |                             |       |       |
| O    | 0.25011              | 0.99984 | 0.18709 |                             |       |       |



|       |         |         |         |
|-------|---------|---------|---------|
| O     | 0.75005 | 0.50008 | 0.18561 |
| O     | 0.25005 | 0.50014 | 0.25363 |
| O     | 0.75007 | 0.00016 | 0.25375 |
| O     | 0.50047 | 0.74999 | 0.25274 |
| O     | 0.99962 | 0.25026 | 0.25280 |
| O     | 0.50049 | 0.25026 | 0.25280 |
| O     | 0.99963 | 0.74999 | 0.25274 |
| O     | 0.25006 | 0.00013 | 0.25335 |
| O     | 0.75006 | 0.50014 | 0.25308 |
| O     | 0.25002 | 0.50015 | 0.32069 |
| O     | 0.75006 | 0.00013 | 0.32058 |
| O     | 0.99961 | 0.25025 | 0.32126 |
| O     | 0.50045 | 0.75005 | 0.32120 |
| O     | 0.99963 | 0.75005 | 0.32122 |
| O     | 0.50047 | 0.25025 | 0.32124 |
| O     | 0.25001 | 0.00012 | 0.32026 |
| O     | 0.75006 | 0.50014 | 0.32051 |
| O     | 0.25005 | 0.50028 | 0.38719 |
| O     | 0.75001 | 0.00034 | 0.38762 |
| O     | 0.50080 | 0.74979 | 0.38991 |
| O     | 0.99929 | 0.25069 | 0.39005 |
| O     | 0.50077 | 0.25071 | 0.38999 |
| O     | 0.99934 | 0.74982 | 0.38995 |
| O     | 0.25007 | 0.00033 | 0.38660 |
| O     | 0.75006 | 0.50022 | 0.38801 |
| O     | 0.25015 | 0.50051 | 0.45262 |
| O     | 0.75032 | 0.00045 | 0.45297 |
| O     | 0.00259 | 0.24542 | 0.46023 |
| O     | 0.49746 | 0.75581 | 0.45986 |
| O     | 0.00290 | 0.75530 | 0.45998 |
| O     | 0.49732 | 0.24528 | 0.46000 |
| O     | 0.24983 | 0.00052 | 0.45203 |
| O     | 0.74977 | 0.50048 | 0.45593 |
| O     | 0.24979 | 0.49973 | 0.52171 |
| O     | 0.74953 | 0.99878 | 0.51732 |
| O     | 0.24999 | 0.99959 | 0.51655 |
| O     | 0.75080 | 0.50061 | 0.54183 |
| O     | 0.74815 | 0.50670 | 0.03255 |
| O     | 0.74984 | 0.49951 | 0.60055 |
| O     | 0.74964 | 0.49735 | 0.97385 |
| <hr/> |         |         |         |
| C     | 0.75041 | 0.50007 | 0.57148 |
| C     | 0.74885 | 0.50205 | 0.00291 |

## Section S5: Surface Structure and Magnetisation - {110} Adsorption

**Table S20** - The final minimised structure of the {110}-Stoich-CO<sub>3</sub>  $\angle$  configuration Va using PBEsol + U. The ionic positions are given as fractional coordinates and the magnetic vectors are presented.

| Atom | Coordinates (Direct) |         |         | Magnetic Vector ( $\mu_B$ ) |       |       |
|------|----------------------|---------|---------|-----------------------------|-------|-------|
|      | X                    | Y       | Z       | X                           | Y     | Z     |
| Pu A | 0.99703              | 0.49825 | 0.06487 | -1.99                       | -3.32 | -0.04 |
| Pu A | 0.50143              | 0.48527 | 0.06251 | -1.40                       | -3.51 | 0.56  |
| Pu A | 0.99608              | 0.99891 | 0.17554 | -2.19                       | -3.10 | -0.01 |
| Pu A | 0.49740              | 0.99827 | 0.17462 | -2.19                       | -3.11 | 0.02  |
| Pu A | 0.99617              | 0.49809 | 0.28814 | -2.19                       | -3.10 | -0.01 |
| Pu A | 0.49740              | 0.49855 | 0.28912 | -2.21                       | -3.09 | 0.04  |
| Pu A | 0.99726              | 0.99865 | 0.39885 | -1.90                       | -3.37 | 0.08  |
| Pu A | 0.50168              | 0.01143 | 0.40120 | -1.80                       | -3.32 | 0.62  |
| Pu B | 0.24263              | 0.74846 | 0.11664 | 2.42                        | 0.00  | 2.94  |
| Pu B | 0.74512              | 0.74837 | 0.11459 | 2.04                        | 0.00  | 3.20  |
| Pu B | 0.24705              | 0.24845 | 0.23186 | 2.23                        | 0.00  | 3.07  |
| Pu B | 0.74516              | 0.24839 | 0.23190 | 2.20                        | 0.00  | 3.09  |
| Pu B | 0.24276              | 0.74847 | 0.34733 | 2.26                        | -0.01 | 3.04  |
| Pu B | 0.74521              | 0.74840 | 0.34910 | 2.10                        | 0.00  | 3.17  |
| Pu B | 0.24728              | 0.24843 | 0.11482 | 2.10                        | 0.00  | -3.17 |
| Pu B | 0.74936              | 0.24841 | 0.11534 | 2.22                        | 0.00  | -3.08 |
| Pu C | 0.24787              | 0.74844 | 0.23190 | 2.21                        | 0.00  | -3.09 |
| Pu C | 0.74617              | 0.74839 | 0.23185 | 2.22                        | 0.00  | -3.08 |
| Pu C | 0.24760              | 0.24845 | 0.34882 | 2.22                        | 0.00  | -3.09 |
| Pu C | 0.74960              | 0.24843 | 0.34851 | 2.26                        | 0.00  | -3.05 |
| Pu C | 0.99703              | 0.99862 | 0.06488 | -1.97                       | 3.34  | -0.04 |
| Pu C | 0.50146              | 0.01155 | 0.06251 | -1.32                       | 3.53  | 0.62  |
| Pu D | 0.99609              | 0.49793 | 0.17554 | -2.19                       | 3.10  | 0.00  |
| Pu D | 0.49740              | 0.49854 | 0.17462 | -2.19                       | 3.11  | 0.02  |
| Pu D | 0.99616              | 0.99875 | 0.28813 | -2.20                       | 3.10  | -0.01 |
| Pu D | 0.49741              | 0.99831 | 0.28912 | -2.21                       | 3.09  | 0.04  |
| Pu D | 0.99727              | 0.49818 | 0.39886 | -1.94                       | 3.35  | 0.09  |
| Pu D | 0.50163              | 0.48560 | 0.40119 | -1.79                       | 3.32  | 0.62  |
| O    | 0.11374              | 0.74843 | 0.06298 |                             |       |       |
| O    | 0.60474              | 0.74820 | 0.06450 |                             |       |       |
| O    | 0.36427              | 0.74897 | 0.05270 |                             |       |       |
| O    | 0.87698              | 0.74840 | 0.06069 |                             |       |       |
| O    | 0.11695              | 0.24842 | 0.06156 |                             |       |       |
| O    | 0.62236              | 0.24849 | 0.05945 |                             |       |       |
| O    | 0.38196              | 0.24831 | 0.06241 |                             |       |       |
| O    | 0.88160              | 0.24841 | 0.06163 |                             |       |       |
| O    | 0.12229              | 0.49653 | 0.11813 |                             |       |       |
| O    | 0.62491              | 0.49241 | 0.11797 |                             |       |       |
| O    | 0.12230              | 0.00033 | 0.11812 |                             |       |       |
| O    | 0.62494              | 0.00434 | 0.11794 |                             |       |       |
| O    | 0.37346              | 0.50838 | 0.11554 |                             |       |       |
| O    | 0.87422              | 0.49996 | 0.11768 |                             |       |       |
| O    | 0.37351              | 0.98853 | 0.11558 |                             |       |       |
| O    | 0.87423              | 0.99681 | 0.11768 |                             |       |       |

|       |         |         |         |
|-------|---------|---------|---------|
| O     | 0.12180 | 0.24841 | 0.17496 |
| O     | 0.62104 | 0.24835 | 0.17514 |
| O     | 0.37159 | 0.24848 | 0.17293 |
| O     | 0.87183 | 0.24841 | 0.17445 |
| O     | 0.12211 | 0.74843 | 0.17397 |
| O     | 0.62061 | 0.74842 | 0.17391 |
| O     | 0.37044 | 0.74839 | 0.17469 |
| O     | 0.87152 | 0.74839 | 0.17484 |
| O     | 0.12222 | 0.99653 | 0.23184 |
| O     | 0.62118 | 0.99612 | 0.23188 |
| O     | 0.12225 | 0.50032 | 0.23184 |
| O     | 0.62118 | 0.50063 | 0.23187 |
| O     | 0.37215 | 0.00101 | 0.23187 |
| O     | 0.87113 | 0.99953 | 0.23187 |
| O     | 0.37215 | 0.49587 | 0.23187 |
| O     | 0.87115 | 0.49722 | 0.23187 |
| O     | 0.12208 | 0.74844 | 0.28960 |
| O     | 0.62077 | 0.74843 | 0.28994 |
| O     | 0.37044 | 0.74840 | 0.28902 |
| O     | 0.87164 | 0.74838 | 0.28884 |
| O     | 0.12184 | 0.24840 | 0.28875 |
| O     | 0.62087 | 0.24837 | 0.28853 |
| O     | 0.37156 | 0.24850 | 0.29079 |
| O     | 0.87176 | 0.24842 | 0.28930 |
| O     | 0.12236 | 0.49739 | 0.34561 |
| O     | 0.62490 | 0.49228 | 0.34581 |
| O     | 0.12237 | 0.99947 | 0.34561 |
| O     | 0.62494 | 0.00456 | 0.34583 |
| O     | 0.37354 | 0.50815 | 0.34812 |
| O     | 0.87433 | 0.49955 | 0.34608 |
| O     | 0.37359 | 0.98883 | 0.34809 |
| O     | 0.87434 | 0.99722 | 0.34608 |
| O     | 0.11601 | 0.24844 | 0.40182 |
| O     | 0.62185 | 0.24855 | 0.40430 |
| O     | 0.38132 | 0.24842 | 0.40135 |
| O     | 0.88068 | 0.24837 | 0.40242 |
| O     | 0.11562 | 0.74842 | 0.40122 |
| O     | 0.60658 | 0.74832 | 0.39946 |
| O     | 0.36692 | 0.74891 | 0.41067 |
| O     | 0.87859 | 0.74839 | 0.40275 |
| O     | 0.43247 | 0.89705 | 0.99969 |
| O     | 0.43204 | 0.89732 | 0.46404 |
| O     | 0.43128 | 0.59904 | 0.99980 |
| O     | 0.43118 | 0.59925 | 0.46397 |
| <hr/> |         |         |         |
| C     | 0.40705 | 0.74835 | 0.01462 |
| C     | 0.40757 | 0.74848 | 0.44907 |

**Table S21** - The final minimised structure of the {110}-Stoich-CO<sub>3</sub>  $\angle$  configuration Vb using PBEsol + U. The ionic positions are given as fractional coordinates and the magnetic vectors are presented.

| Atom | Coordinates (Direct) |         |         | Magnetic Vector ( $\mu_B$ ) |       |       |
|------|----------------------|---------|---------|-----------------------------|-------|-------|
|      | X                    | Y       | Z       | X                           | Y     | Z     |
| Pu A | 0.00431              | 0.49992 | 0.06487 | -2.00                       | -3.32 | -0.03 |
| Pu A | 0.50886              | 0.48694 | 0.06251 | -0.71                       | -3.69 | 0.68  |
| Pu A | 0.00322              | 0.00061 | 0.17553 | -2.20                       | -3.10 | -0.01 |
| Pu A | 0.50450              | 0.99996 | 0.17461 | -2.19                       | -3.11 | 0.02  |
| Pu A | 0.00325              | 0.49981 | 0.28814 | -2.20                       | -3.10 | -0.01 |
| Pu A | 0.50445              | 0.50022 | 0.28914 | -2.21                       | -3.09 | 0.04  |
| Pu A | 0.00438              | 0.00038 | 0.39886 | -1.92                       | -3.36 | 0.08  |
| Pu A | 0.50895              | 0.01295 | 0.40122 | -1.79                       | -3.32 | 0.63  |
| Pu B | 0.24986              | 0.75005 | 0.11660 | 2.43                        | 0.00  | 2.93  |
| Pu B | 0.75238              | 0.75019 | 0.11463 | 2.04                        | 0.02  | 3.20  |
| Pu B | 0.25410              | 0.25008 | 0.23187 | 2.24                        | 0.00  | 3.07  |
| Pu B | 0.75220              | 0.25014 | 0.23190 | 2.21                        | 0.00  | 3.09  |
| Pu B | 0.24990              | 0.75007 | 0.34738 | 2.26                        | 0.00  | 3.03  |
| Pu B | 0.75235              | 0.75014 | 0.34906 | 2.10                        | 0.00  | 3.17  |
| Pu B | 0.25453              | 0.25003 | 0.11477 | 2.10                        | 0.02  | -3.17 |
| Pu B | 0.75661              | 0.25013 | 0.11536 | 2.22                        | 0.00  | -3.08 |
| Pu C | 0.25495              | 0.75009 | 0.23190 | 2.22                        | 0.00  | -3.09 |
| Pu C | 0.75322              | 0.75014 | 0.23185 | 2.22                        | 0.00  | -3.08 |
| Pu C | 0.25472              | 0.25008 | 0.34888 | 2.23                        | 0.00  | -3.08 |
| Pu C | 0.75676              | 0.25011 | 0.34849 | 2.26                        | 0.00  | -3.05 |
| Pu C | 0.00431              | 0.00028 | 0.06486 | -2.00                       | 3.31  | -0.03 |
| Pu C | 0.50900              | 0.01325 | 0.06247 | -1.61                       | 3.42  | 0.53  |
| Pu D | 0.00322              | 0.49963 | 0.17553 | -2.20                       | 3.10  | -0.01 |
| Pu D | 0.50450              | 0.50025 | 0.17462 | -2.19                       | 3.11  | 0.02  |
| Pu D | 0.00326              | 0.00046 | 0.28814 | -2.20                       | 3.10  | -0.01 |
| Pu D | 0.50445              | 0.99997 | 0.28914 | -2.22                       | 3.09  | 0.04  |
| Pu D | 0.00438              | 0.49992 | 0.39886 | -1.92                       | 3.36  | 0.08  |
| Pu D | 0.50901              | 0.48702 | 0.40122 | -1.80                       | 3.31  | 0.64  |
| O    | 0.12119              | 0.75012 | 0.06296 |                             |       |       |
| O    | 0.61230              | 0.75039 | 0.06457 |                             |       |       |
| O    | 0.37214              | 0.74912 | 0.05228 |                             |       |       |
| O    | 0.88439              | 0.75012 | 0.06071 |                             |       |       |
| O    | 0.12429              | 0.25005 | 0.06151 |                             |       |       |
| O    | 0.62983              | 0.24998 | 0.05947 |                             |       |       |
| O    | 0.38936              | 0.25023 | 0.06238 |                             |       |       |
| O    | 0.88896              | 0.25016 | 0.06166 |                             |       |       |
| O    | 0.12951              | 0.49809 | 0.11810 |                             |       |       |
| O    | 0.63214              | 0.49416 | 0.11797 |                             |       |       |
| O    | 0.12950              | 0.00205 | 0.11812 |                             |       |       |
| O    | 0.63215              | 0.00618 | 0.11801 |                             |       |       |
| O    | 0.38067              | 0.51016 | 0.11553 |                             |       |       |
| O    | 0.88145              | 0.50174 | 0.11768 |                             |       |       |
| O    | 0.38066              | 0.98985 | 0.11544 |                             |       |       |
| O    | 0.88145              | 0.99856 | 0.11768 |                             |       |       |
| O    | 0.12889              | 0.25011 | 0.17497 |                             |       |       |

|       |         |         |         |
|-------|---------|---------|---------|
| O     | 0.62809 | 0.25017 | 0.17516 |
| O     | 0.37866 | 0.24999 | 0.17289 |
| O     | 0.87893 | 0.25013 | 0.17446 |
| O     | 0.12929 | 0.75008 | 0.17391 |
| O     | 0.62769 | 0.75009 | 0.17391 |
| O     | 0.37754 | 0.75013 | 0.17469 |
| O     | 0.87865 | 0.75015 | 0.17486 |
| O     | 0.12929 | 0.99809 | 0.23184 |
| O     | 0.62818 | 0.99781 | 0.23187 |
| O     | 0.12929 | 0.50211 | 0.23184 |
| O     | 0.62817 | 0.50246 | 0.23189 |
| O     | 0.37917 | 0.00276 | 0.23188 |
| O     | 0.87819 | 0.00136 | 0.23187 |
| O     | 0.37917 | 0.49739 | 0.23187 |
| O     | 0.87818 | 0.49895 | 0.23187 |
| O     | 0.12919 | 0.75012 | 0.28965 |
| O     | 0.62779 | 0.75011 | 0.28994 |
| O     | 0.37748 | 0.75007 | 0.28902 |
| O     | 0.87871 | 0.75016 | 0.28882 |
| O     | 0.12887 | 0.25012 | 0.28874 |
| O     | 0.62785 | 0.25011 | 0.28850 |
| O     | 0.37855 | 0.25007 | 0.29086 |
| O     | 0.87880 | 0.25015 | 0.28930 |
| O     | 0.12949 | 0.49898 | 0.34563 |
| O     | 0.63207 | 0.49385 | 0.34579 |
| O     | 0.12947 | 0.00124 | 0.34563 |
| O     | 0.63203 | 0.00636 | 0.34579 |
| O     | 0.38067 | 0.50995 | 0.34818 |
| O     | 0.88149 | 0.50137 | 0.34608 |
| O     | 0.38064 | 0.99013 | 0.34819 |
| O     | 0.88147 | 0.99894 | 0.34608 |
| O     | 0.12317 | 0.25012 | 0.40187 |
| O     | 0.62913 | 0.24999 | 0.40429 |
| O     | 0.38856 | 0.25003 | 0.40137 |
| O     | 0.88785 | 0.25019 | 0.40239 |
| O     | 0.12286 | 0.75016 | 0.40124 |
| O     | 0.61381 | 0.75011 | 0.39935 |
| O     | 0.37438 | 0.74976 | 0.41110 |
| O     | 0.88580 | 0.75017 | 0.40275 |
| O     | 0.44123 | 0.89899 | 0.99961 |
| O     | 0.44105 | 0.89898 | 0.46417 |
| O     | 0.44219 | 0.60106 | 0.99950 |
| O     | 0.44141 | 0.60097 | 0.46419 |
| <hr/> |         |         |         |
| C     | 0.41633 | 0.74973 | 0.01437 |
| C     | 0.41657 | 0.74990 | 0.44931 |

**Table S22** - The final minimised structure of the {110}-Redu-CO<sub>3</sub>  $\angle$  configuration VIa using PBEsol + U. The ionic positions are given as fractional coordinates and the magnetic vectors are presented.

| Atom | Coordinates (Direct) |         |         | Magnetic Vector ( $\mu_B$ ) |       |       |
|------|----------------------|---------|---------|-----------------------------|-------|-------|
|      | X                    | Y       | Z       | X                           | Y     | Z     |
| Pu A | 0.00347              | 0.50604 | 0.06344 | -1.77                       | -3.33 | -0.75 |
| Pu A | 0.51181              | 0.50512 | 0.06146 | -0.29                       | -0.36 | -4.79 |
| Pu A | 0.00487              | 0.99297 | 0.17510 | -2.22                       | -3.08 | -0.01 |
| Pu A | 0.50845              | 0.99348 | 0.17493 | -2.21                       | -3.09 | -0.08 |
| Pu A | 0.00413              | 0.49617 | 0.28931 | -2.22                       | -3.08 | -0.01 |
| Pu A | 0.50892              | 0.49587 | 0.28929 | -2.18                       | -3.11 | -0.05 |
| Pu A | 0.00466              | 0.98458 | 0.39877 | 1.67                        | -3.36 | -0.86 |
| Pu A | 0.51279              | 0.98751 | 0.40233 | 0.12                        | 0.23  | 4.80  |
| Pu B | 0.26149              | 0.74421 | 0.11420 | 2.49                        | 0.01  | 2.86  |
| Pu B | 0.75283              | 0.74442 | 0.11484 | 2.38                        | 0.00  | 2.95  |
| Pu B | 0.25719              | 0.24483 | 0.23136 | 2.10                        | 0.00  | 3.17  |
| Pu B | 0.75604              | 0.24531 | 0.23196 | 2.26                        | -0.01 | 3.06  |
| Pu B | 0.26097              | 0.74361 | 0.34946 | 2.33                        | 0.11  | 3.01  |
| Pu B | 0.75339              | 0.74506 | 0.34953 | 2.38                        | -0.01 | 2.96  |
| Pu B | 0.25884              | 0.24318 | 0.12010 | 2.14                        | 0.09  | -3.13 |
| Pu B | 0.75335              | 0.24552 | 0.11393 | 2.21                        | 0.00  | -3.09 |
| Pu C | 0.25719              | 0.74365 | 0.23189 | 2.26                        | -0.01 | -3.05 |
| Pu C | 0.75583              | 0.74438 | 0.23194 | 2.21                        | -0.01 | -3.09 |
| Pu C | 0.25777              | 0.24161 | 0.34156 | 1.89                        | -0.20 | -3.27 |
| Pu C | 0.75407              | 0.24738 | 0.35004 | 2.35                        | -0.04 | -2.98 |
| Pu C | 0.00246              | 0.98330 | 0.06421 | -1.80                       | 3.30  | -0.84 |
| Pu C | 0.51233              | 0.98588 | 0.06222 | -0.31                       | 0.38  | -4.78 |
| Pu D | 0.00500              | 0.49592 | 0.17503 | -2.21                       | 3.09  | -0.01 |
| Pu D | 0.50831              | 0.49574 | 0.17470 | -2.22                       | 3.08  | -0.07 |
| Pu D | 0.00416              | 0.99193 | 0.28837 | -2.24                       | 3.06  | -0.09 |
| Pu D | 0.50937              | 0.99392 | 0.28911 | -2.19                       | 3.10  | -0.04 |
| Pu D | 0.00569              | 0.50904 | 0.40191 | 2.29                        | 3.04  | -0.38 |
| Pu D | 0.51201              | 0.50782 | 0.40293 | -0.46                       | 0.00  | -4.78 |
| O    | 0.12017              | 0.74617 | 0.06161 |                             |       |       |
| O    | 0.63411              | 0.74599 | 0.06007 |                             |       |       |
| O    | 0.37855              | 0.74620 | 0.06209 |                             |       |       |
| O    | 0.88650              | 0.74530 | 0.05815 |                             |       |       |
| O    | 0.14941              | 0.24681 | 0.05135 |                             |       |       |
| O    | 0.62744              | 0.24531 | 0.06199 |                             |       |       |
| O    | 0.90577              | 0.24442 | 0.06192 |                             |       |       |
| O    | 0.12945              | 0.48409 | 0.11517 |                             |       |       |
| O    | 0.63462              | 0.49709 | 0.11895 |                             |       |       |
| O    | 0.12910              | 0.00461 | 0.11568 |                             |       |       |
| O    | 0.63492              | 0.99304 | 0.11916 |                             |       |       |
| O    | 0.38029              | 0.48339 | 0.11739 |                             |       |       |
| O    | 0.88359              | 0.49999 | 0.11625 |                             |       |       |
| O    | 0.38057              | 0.00501 | 0.11790 |                             |       |       |
| O    | 0.88322              | 0.98950 | 0.11665 |                             |       |       |
| O    | 0.13216              | 0.24421 | 0.17481 |                             |       |       |
| O    | 0.63125              | 0.24503 | 0.17457 |                             |       |       |

|       |         |         |         |
|-------|---------|---------|---------|
| O     | 0.38115 | 0.24478 | 0.17555 |
| O     | 0.88242 | 0.24515 | 0.17379 |
| O     | 0.13135 | 0.74438 | 0.17321 |
| O     | 0.63122 | 0.74473 | 0.17524 |
| O     | 0.38220 | 0.74407 | 0.17348 |
| O     | 0.88151 | 0.74415 | 0.17472 |
| O     | 0.13049 | 0.99255 | 0.23187 |
| O     | 0.63230 | 0.99564 | 0.23212 |
| O     | 0.13041 | 0.49553 | 0.23164 |
| O     | 0.63213 | 0.49429 | 0.23205 |
| O     | 0.38092 | 0.99143 | 0.23185 |
| O     | 0.88130 | 0.99572 | 0.23156 |
| O     | 0.38104 | 0.49732 | 0.23194 |
| O     | 0.88208 | 0.49374 | 0.23203 |
| O     | 0.13187 | 0.74054 | 0.29037 |
| O     | 0.63177 | 0.74519 | 0.28893 |
| O     | 0.38271 | 0.74506 | 0.29070 |
| O     | 0.88192 | 0.74501 | 0.28889 |
| O     | 0.13246 | 0.24632 | 0.28837 |
| O     | 0.63208 | 0.24562 | 0.28953 |
| O     | 0.38236 | 0.24430 | 0.28712 |
| O     | 0.88227 | 0.24480 | 0.29010 |
| O     | 0.13007 | 0.48198 | 0.34971 |
| O     | 0.63451 | 0.49800 | 0.34511 |
| O     | 0.12797 | 0.00074 | 0.34538 |
| O     | 0.63417 | 0.99463 | 0.34511 |
| O     | 0.38032 | 0.47830 | 0.34687 |
| O     | 0.88291 | 0.50093 | 0.34747 |
| O     | 0.38061 | 0.01049 | 0.34690 |
| O     | 0.88181 | 0.99112 | 0.34692 |
| O     | 0.17210 | 0.19512 | 0.40847 |
| O     | 0.62678 | 0.24662 | 0.40216 |
| O     | 0.91101 | 0.24689 | 0.40246 |
| O     | 0.12156 | 0.75172 | 0.40107 |
| O     | 0.63450 | 0.74999 | 0.40434 |
| O     | 0.37999 | 0.74803 | 0.40122 |
| O     | 0.88762 | 0.74524 | 0.40598 |
| O     | 0.17718 | 0.42808 | 0.44874 |
| O     | 0.24989 | 0.38254 | 0.00076 |
| O     | 0.35456 | 0.29061 | 0.42974 |
| O     | 0.35494 | 0.24612 | 0.05064 |
| <hr/> |         |         |         |
| C     | 0.23621 | 0.30825 | 0.43091 |
| C     | 0.25281 | 0.29436 | 0.03150 |

**Table S23** - The final minimised structure of the  $\{110\}$ -Redu-CO<sub>3</sub>  $\angle$  configuration VIb using PBEsol + U. The ionic positions are given as fractional coordinates and the magnetic vectors are presented.

| Atom | Coordinates (Direct) |         |         | Magnetic Vector ( $\mu_B$ ) |       |       |
|------|----------------------|---------|---------|-----------------------------|-------|-------|
|      | X                    | Y       | Z       | X                           | Y     | Z     |
| Pu A | 0.99882              | 0.51668 | 0.06463 | -1.87                       | -3.38 | 0.17  |
| Pu A | 0.49997              | 0.54908 | 0.06185 | 1.41                        | -3.10 | -1.76 |
| Pu A | 0.99881              | 0.01359 | 0.17597 | -2.24                       | -3.07 | 0.09  |
| Pu A | 0.49753              | 0.01629 | 0.17332 | -2.23                       | -3.08 | -0.10 |
| Pu A | 0.99870              | 0.51846 | 0.28790 | -2.22                       | -3.08 | 0.05  |
| Pu A | 0.49785              | 0.51517 | 0.28962 | -2.22                       | -3.09 | -0.04 |
| Pu A | 0.99839              | 0.01608 | 0.39940 | -1.87                       | -3.39 | -0.01 |
| Pu A | 0.50210              | 0.99085 | 0.40399 | 0.66                        | -3.86 | -2.75 |
| Pu B | 0.24683              | 0.76723 | 0.11411 | 2.32                        | -0.05 | 3.01  |
| Pu B | 0.75181              | 0.76726 | 0.11554 | 2.19                        | 0.01  | 3.10  |
| Pu B | 0.25043              | 0.26556 | 0.23188 | 2.09                        | 0.00  | 3.17  |
| Pu B | 0.74612              | 0.26573 | 0.23204 | 2.21                        | 0.00  | 3.09  |
| Pu B | 0.24647              | 0.76702 | 0.34970 | 2.12                        | 0.10  | 3.15  |
| Pu B | 0.75166              | 0.76727 | 0.34804 | 2.33                        | -0.01 | 3.01  |
| Pu B | 0.23960              | 0.26453 | 0.11840 | 2.78                        | 0.09  | -3.91 |
| Pu B | 0.75454              | 0.26585 | 0.11780 | 2.59                        | -0.01 | -2.80 |
| Pu C | 0.25026              | 0.76607 | 0.23188 | 2.25                        | 0.00  | -3.06 |
| Pu C | 0.74574              | 0.76665 | 0.23188 | 2.22                        | 0.00  | -3.08 |
| Pu C | 0.23959              | 0.26451 | 0.34541 | -2.77                       | -0.10 | -3.92 |
| Pu C | 0.75378              | 0.26600 | 0.34665 | 2.34                        | 0.10  | -2.97 |
| Pu C | 0.99858              | 0.01629 | 0.06445 | -1.88                       | 3.38  | 0.14  |
| Pu C | 0.50223              | 0.99143 | 0.05941 | -3.25                       | 2.57  | -2.40 |
| Pu D | 0.99886              | 0.51891 | 0.17595 | -2.23                       | 3.07  | 0.09  |
| Pu D | 0.49791              | 0.51501 | 0.17406 | -2.23                       | 3.08  | -0.10 |
| Pu D | 0.99865              | 0.01402 | 0.28790 | -2.22                       | 3.08  | 0.04  |
| Pu D | 0.49748              | 0.01623 | 0.29029 | -2.22                       | 3.08  | -0.03 |
| Pu D | 0.99862              | 0.51685 | 0.39922 | -1.86                       | 3.39  | -0.01 |
| Pu D | 0.50018              | 0.54913 | 0.40183 | -1.47                       | 3.11  | -1.69 |
| O    | 0.11594              | 0.76706 | 0.05999 |                             |       |       |
| O    | 0.62567              | 0.76001 | 0.05977 |                             |       |       |
| O    | 0.37155              | 0.75856 | 0.05776 |                             |       |       |
| O    | 0.88096              | 0.76684 | 0.06180 |                             |       |       |
| O    | 0.11654              | 0.26642 | 0.05883 |                             |       |       |
| O    | 0.59437              | 0.27966 | 0.04749 |                             |       |       |
| O    | 0.87567              | 0.26648 | 0.06286 |                             |       |       |
| O    | 0.11796              | 0.52448 | 0.11785 |                             |       |       |
| O    | 0.62558              | 0.50807 | 0.11535 |                             |       |       |
| O    | 0.11725              | 0.00784 | 0.11783 |                             |       |       |
| O    | 0.62843              | 0.02502 | 0.11535 |                             |       |       |
| O    | 0.37622              | 0.50997 | 0.11410 |                             |       |       |
| O    | 0.87437              | 0.51808 | 0.11838 |                             |       |       |
| O    | 0.37394              | 0.01900 | 0.11467 |                             |       |       |
| O    | 0.87508              | 0.01499 | 0.11836 |                             |       |       |
| O    | 0.11939              | 0.26606 | 0.17625 |                             |       |       |
| O    | 0.62419              | 0.26635 | 0.17438 |                             |       |       |



|       |         |         |         |
|-------|---------|---------|---------|
| O     | 0.37704 | 0.26630 | 0.17622 |
| O     | 0.87173 | 0.26627 | 0.17424 |
| O     | 0.12425 | 0.76636 | 0.17518 |
| O     | 0.62316 | 0.76582 | 0.17297 |
| O     | 0.37356 | 0.76457 | 0.17237 |
| O     | 0.87272 | 0.76650 | 0.17516 |
| O     | 0.12463 | 0.01488 | 0.23194 |
| O     | 0.62188 | 0.01467 | 0.23189 |
| O     | 0.12467 | 0.51717 | 0.23194 |
| O     | 0.62191 | 0.51754 | 0.23189 |
| O     | 0.37479 | 0.01082 | 0.23187 |
| O     | 0.87179 | 0.01706 | 0.23189 |
| O     | 0.37481 | 0.52039 | 0.23187 |
| O     | 0.87176 | 0.51549 | 0.23188 |
| O     | 0.12425 | 0.76637 | 0.28871 |
| O     | 0.62308 | 0.76596 | 0.29069 |
| O     | 0.37363 | 0.76449 | 0.29142 |
| O     | 0.87257 | 0.76645 | 0.28869 |
| O     | 0.11954 | 0.26606 | 0.28774 |
| O     | 0.62430 | 0.26642 | 0.28952 |
| O     | 0.37718 | 0.26621 | 0.28747 |
| O     | 0.87178 | 0.26627 | 0.28945 |
| O     | 0.11775 | 0.52508 | 0.34602 |
| O     | 0.62545 | 0.50930 | 0.34826 |
| O     | 0.11702 | 0.00715 | 0.34605 |
| O     | 0.62817 | 0.02433 | 0.34828 |
| O     | 0.37608 | 0.50974 | 0.34971 |
| O     | 0.87417 | 0.51674 | 0.34551 |
| O     | 0.37360 | 0.01892 | 0.34915 |
| O     | 0.87479 | 0.01634 | 0.34553 |
| O     | 0.11553 | 0.26636 | 0.40472 |
| O     | 0.59630 | 0.27952 | 0.41509 |
| O     | 0.87446 | 0.26653 | 0.40153 |
| O     | 0.11651 | 0.76700 | 0.40418 |
| O     | 0.62596 | 0.76059 | 0.40389 |
| O     | 0.37150 | 0.75798 | 0.40617 |
| O     | 0.88169 | 0.76675 | 0.40159 |
| O     | 0.51139 | 0.42487 | 0.46614 |
| O     | 0.50630 | 0.42624 | 0.99722 |
| O     | 0.53564 | 0.12980 | 0.46965 |
| O     | 0.52910 | 0.13082 | 0.99344 |
| <hr/> |         |         |         |
| C     | 0.54884 | 0.27644 | 0.45335 |
| C     | 0.54398 | 0.27744 | 0.00967 |

**Table S24** - The final minimised structure of the  $\{110\}$ -Redu-CO<sub>3</sub>  $\angle$  configuration VIc using PBEsol + U. The ionic positions are given as fractional coordinates and the magnetic vectors are presented.

| Atom | Coordinates (Direct) |         |         | Magnetic Vector ( $\mu_B$ ) |       |       |
|------|----------------------|---------|---------|-----------------------------|-------|-------|
|      | X                    | Y       | Z       | X                           | Y     | Z     |
| Pu A | 0.00957              | 0.50123 | 0.06471 | -1.89                       | -3.38 | -0.07 |
| Pu A | 0.52068              | 0.50518 | 0.05928 | -3.30                       | -3.47 | -0.30 |
| Pu A | 0.00254              | 0.99961 | 0.17549 | -2.21                       | -3.09 | 0.05  |
| Pu A | 0.50645              | 0.00106 | 0.17361 | -2.22                       | -3.08 | -0.10 |
| Pu A | 0.00293              | 0.50295 | 0.28759 | -2.23                       | -3.08 | -0.02 |
| Pu A | 0.50483              | 0.50054 | 0.28912 | -2.20                       | -3.10 | -0.11 |
| Pu A | 0.00714              | 0.99886 | 0.39897 | -1.86                       | -3.37 | -0.32 |
| Pu A | 0.51764              | 0.99522 | 0.40446 | -0.92                       | -3.51 | -3.14 |
| Pu B | 0.25476              | 0.75091 | 0.11549 | 2.43                        | 0.00  | 2.94  |
| Pu B | 0.75776              | 0.75063 | 0.11464 | 2.25                        | -0.03 | 3.05  |
| Pu B | 0.25587              | 0.25056 | 0.23153 | 2.16                        | 0.00  | 3.13  |
| Pu B | 0.75210              | 0.25061 | 0.23162 | 2.22                        | 0.00  | 3.08  |
| Pu B | 0.25361              | 0.75127 | 0.34906 | 3.67                        | 0.10  | 3.11  |
| Pu B | 0.75821              | 0.75246 | 0.34751 | 2.24                        | 0.01  | 3.07  |
| Pu B | 0.24976              | 0.25106 | 0.11894 | 2.24                        | -0.15 | -3.05 |
| Pu B | 0.75528              | 0.25051 | 0.11429 | 2.18                        | 0.00  | -3.11 |
| Pu C | 0.25533              | 0.75099 | 0.23177 | 2.19                        | 0.00  | -3.11 |
| Pu C | 0.75099              | 0.75108 | 0.23156 | 2.21                        | 0.00  | -3.09 |
| Pu C | 0.24551              | 0.24960 | 0.34467 | 2.65                        | -0.06 | -2.73 |
| Pu C | 0.75696              | 0.25021 | 0.34825 | 2.24                        | 0.03  | -3.06 |
| Pu C | 0.00961              | 0.00037 | 0.06470 | -1.89                       | 3.37  | -0.07 |
| Pu C | 0.51993              | 0.99462 | 0.05946 | -1.14                       | 3.07  | -3.52 |
| Pu D | 0.00251              | 0.50199 | 0.17555 | -2.20                       | 3.09  | 0.05  |
| Pu D | 0.50634              | 0.50054 | 0.17338 | -2.23                       | 3.08  | -0.10 |
| Pu D | 0.00295              | 0.99867 | 0.28753 | -2.23                       | 3.08  | -0.02 |
| Pu D | 0.50503              | 0.00113 | 0.29011 | -2.21                       | 3.09  | -0.09 |
| Pu D | 0.00696              | 0.50309 | 0.39880 | -1.83                       | 3.39  | -0.33 |
| Pu D | 0.52254              | 0.50673 | 0.40191 | -3.36                       | 1.70  | 0.73  |
| O    | 0.12560              | 0.75086 | 0.06235 |                             |       |       |
| O    | 0.63145              | 0.75001 | 0.06064 |                             |       |       |
| O    | 0.36952              | 0.75021 | 0.05522 |                             |       |       |
| O    | 0.89226              | 0.75080 | 0.06066 |                             |       |       |
| O    | 0.13924              | 0.25099 | 0.06227 |                             |       |       |
| O    | 0.62442              | 0.25024 | 0.06080 |                             |       |       |
| O    | 0.89627              | 0.25075 | 0.06073 |                             |       |       |
| O    | 0.13061              | 0.50287 | 0.11868 |                             |       |       |
| O    | 0.63812              | 0.50179 | 0.11916 |                             |       |       |
| O    | 0.13059              | 0.99899 | 0.11866 |                             |       |       |
| O    | 0.63817              | 0.99917 | 0.11920 |                             |       |       |
| O    | 0.38091              | 0.48926 | 0.11305 |                             |       |       |
| O    | 0.88538              | 0.50000 | 0.11700 |                             |       |       |
| O    | 0.38057              | 0.01325 | 0.11291 |                             |       |       |
| O    | 0.88540              | 0.00140 | 0.11697 |                             |       |       |
| O    | 0.12848              | 0.25085 | 0.17441 |                             |       |       |
| O    | 0.62793              | 0.25068 | 0.17428 |                             |       |       |

|       |         |         |         |
|-------|---------|---------|---------|
| O     | 0.37843 | 0.25055 | 0.17441 |
| O     | 0.87868 | 0.25077 | 0.17457 |
| O     | 0.13029 | 0.75079 | 0.17445 |
| O     | 0.62764 | 0.75072 | 0.17502 |
| O     | 0.37939 | 0.75124 | 0.17169 |
| O     | 0.87890 | 0.75081 | 0.17447 |
| O     | 0.12958 | 0.00287 | 0.23125 |
| O     | 0.62714 | 0.00210 | 0.23214 |
| O     | 0.12957 | 0.49864 | 0.23133 |
| O     | 0.62715 | 0.49960 | 0.23198 |
| O     | 0.37978 | 0.99849 | 0.23177 |
| O     | 0.87710 | 0.00012 | 0.23150 |
| O     | 0.37967 | 0.50307 | 0.23140 |
| O     | 0.87705 | 0.50161 | 0.23157 |
| O     | 0.12674 | 0.75082 | 0.28683 |
| O     | 0.62896 | 0.75110 | 0.28924 |
| O     | 0.38311 | 0.74982 | 0.29029 |
| O     | 0.87822 | 0.75108 | 0.28872 |
| O     | 0.12848 | 0.25051 | 0.28838 |
| O     | 0.62791 | 0.25094 | 0.28966 |
| O     | 0.37752 | 0.25137 | 0.28879 |
| O     | 0.87791 | 0.25079 | 0.28893 |
| O     | 0.12552 | 0.49895 | 0.34499 |
| O     | 0.63504 | 0.50167 | 0.34531 |
| O     | 0.12489 | 0.00196 | 0.34498 |
| O     | 0.63649 | 0.00142 | 0.34605 |
| O     | 0.38569 | 0.47658 | 0.35290 |
| O     | 0.88161 | 0.50019 | 0.34577 |
| O     | 0.38222 | 0.02269 | 0.35245 |
| O     | 0.88229 | 0.00231 | 0.34575 |
| O     | 0.13573 | 0.25056 | 0.40181 |
| O     | 0.61431 | 0.26010 | 0.40415 |
| O     | 0.89044 | 0.25096 | 0.40230 |
| O     | 0.11903 | 0.75090 | 0.40539 |
| O     | 0.62781 | 0.74354 | 0.40250 |
| O     | 0.37607 | 0.73833 | 0.41203 |
| O     | 0.88686 | 0.75170 | 0.40138 |
| O     | 0.40275 | 0.90006 | 0.99889 |
| O     | 0.41918 | 0.88285 | 0.46850 |
| O     | 0.40361 | 0.60125 | 0.99880 |
| O     | 0.43594 | 0.58495 | 0.46488 |
| <hr/> |         |         |         |
| C     | 0.38781 | 0.75047 | 0.01445 |
| C     | 0.40669 | 0.73707 | 0.45154 |

**Table S25** - The final minimised structure of the {110}-Redu-CO<sub>3</sub>  $\angle$  configuration Vld using PBEsol + U. The ionic positions are given as fractional coordinates and the magnetic vectors are presented.

| Atom | Coordinates (Direct) |         |         | Magnetic Vector ( $\mu_B$ ) |       |       |
|------|----------------------|---------|---------|-----------------------------|-------|-------|
|      | X                    | Y       | Z       | X                           | Y     | Z     |
| Pu A | 0.99897              | 0.49869 | 0.06462 | -1.85                       | -3.39 | 0.18  |
| Pu A | 0.51339              | 0.50906 | 0.06236 | -2.36                       | -0.02 | -3.01 |
| Pu A | 0.99701              | 0.99949 | 0.17579 | -2.23                       | -3.07 | 0.05  |
| Pu A | 0.49824              | 0.99913 | 0.17361 | -2.21                       | -3.09 | -0.05 |
| Pu A | 0.99733              | 0.49989 | 0.28796 | -2.21                       | -3.09 | 0.01  |
| Pu A | 0.49807              | 0.49917 | 0.28930 | -2.20                       | -3.10 | 0.04  |
| Pu A | 0.99897              | 0.00074 | 0.39933 | -1.87                       | -3.39 | 0.14  |
| Pu A | 0.51045              | 0.99322 | 0.40412 | -4.49                       | 0.76  | -1.49 |
| Pu B | 0.24334              | 0.75030 | 0.11552 | 2.43                        | -0.01 | 2.94  |
| Pu B | 0.75263              | 0.75147 | 0.11583 | 2.28                        | -0.02 | 3.03  |
| Pu B | 0.24969              | 0.24877 | 0.23185 | 2.10                        | 0.00  | 3.17  |
| Pu B | 0.74570              | 0.24918 | 0.23190 | 2.23                        | 0.00  | 3.07  |
| Pu B | 0.24371              | 0.75033 | 0.34852 | 2.19                        | 0.04  | 3.10  |
| Pu B | 0.75261              | 0.75139 | 0.34769 | 2.23                        | 0.02  | 3.07  |
| Pu B | 0.24141              | 0.24823 | 0.11804 | 2.96                        | 0.06  | -3.79 |
| Pu B | 0.74879              | 0.24891 | 0.11565 | 2.27                        | 0.00  | -3.06 |
| Pu C | 0.24875              | 0.74955 | 0.23186 | 2.25                        | 0.00  | -3.06 |
| Pu C | 0.74525              | 0.75016 | 0.23183 | 2.20                        | 0.00  | -3.10 |
| Pu C | 0.24189              | 0.24787 | 0.34569 | -2.85                       | -0.04 | -3.87 |
| Pu C | 0.74907              | 0.24927 | 0.34817 | 2.28                        | 0.04  | -3.03 |
| Pu C | 0.99910              | 0.00096 | 0.06439 | -1.87                       | 3.38  | 0.17  |
| Pu C | 0.50894              | 0.99216 | 0.05970 | -1.88                       | 3.14  | -3.11 |
| Pu D | 0.99697              | 0.49984 | 0.17578 | -2.22                       | 3.08  | 0.05  |
| Pu D | 0.49803              | 0.49912 | 0.17438 | -2.23                       | 3.08  | -0.02 |
| Pu D | 0.99728              | 0.99939 | 0.28795 | -2.22                       | 3.09  | 0.01  |
| Pu D | 0.49811              | 0.99907 | 0.29011 | -2.23                       | 3.08  | 0.08  |
| Pu D | 0.99895              | 0.49882 | 0.39911 | -1.84                       | 3.40  | 0.16  |
| Pu D | 0.51325              | 0.50944 | 0.40143 | -3.36                       | 1.75  | 0.67  |
| O    | 0.11721              | 0.74993 | 0.06108 |                             |       |       |
| O    | 0.62094              | 0.74293 | 0.06074 |                             |       |       |
| O    | 0.36498              | 0.74064 | 0.05278 |                             |       |       |
| O    | 0.88119              | 0.75051 | 0.06141 |                             |       |       |
| O    | 0.11775              | 0.24979 | 0.05908 |                             |       |       |
| O    | 0.60013              | 0.25910 | 0.06027 |                             |       |       |
| O    | 0.87773              | 0.24970 | 0.06152 |                             |       |       |
| O    | 0.11928              | 0.50613 | 0.11813 |                             |       |       |
| O    | 0.62888              | 0.50130 | 0.11814 |                             |       |       |
| O    | 0.11853              | 0.99277 | 0.11810 |                             |       |       |
| O    | 0.63023              | 0.99939 | 0.11768 |                             |       |       |
| O    | 0.37908              | 0.49910 | 0.11226 |                             |       |       |
| O    | 0.87507              | 0.49908 | 0.11778 |                             |       |       |
| O    | 0.37573              | 0.99636 | 0.11264 |                             |       |       |
| O    | 0.87578              | 0.00118 | 0.11775 |                             |       |       |
| O    | 0.11967              | 0.24940 | 0.17606 |                             |       |       |
| O    | 0.62251              | 0.24975 | 0.17396 |                             |       |       |

|       |         |         |         |
|-------|---------|---------|---------|
| O     | 0.37627 | 0.24942 | 0.17562 |
| O     | 0.87086 | 0.24964 | 0.17444 |
| O     | 0.12387 | 0.74970 | 0.17458 |
| O     | 0.62190 | 0.74945 | 0.17456 |
| O     | 0.37156 | 0.74815 | 0.17236 |
| O     | 0.87269 | 0.75004 | 0.17482 |
| O     | 0.12339 | 0.99803 | 0.23184 |
| O     | 0.62099 | 0.00032 | 0.23186 |
| O     | 0.12340 | 0.50074 | 0.23184 |
| O     | 0.62098 | 0.49890 | 0.23188 |
| O     | 0.37361 | 0.99435 | 0.23188 |
| O     | 0.87103 | 0.99968 | 0.23187 |
| O     | 0.37345 | 0.50352 | 0.23185 |
| O     | 0.87095 | 0.49980 | 0.23187 |
| O     | 0.12389 | 0.74974 | 0.28902 |
| O     | 0.62203 | 0.74975 | 0.28926 |
| O     | 0.37162 | 0.74783 | 0.29144 |
| O     | 0.87273 | 0.74993 | 0.28893 |
| O     | 0.12002 | 0.24933 | 0.28783 |
| O     | 0.62259 | 0.24968 | 0.28976 |
| O     | 0.37647 | 0.24936 | 0.28796 |
| O     | 0.87112 | 0.24965 | 0.28926 |
| O     | 0.11949 | 0.50713 | 0.34566 |
| O     | 0.62895 | 0.50145 | 0.34552 |
| O     | 0.11866 | 0.99161 | 0.34570 |
| O     | 0.63042 | 0.99969 | 0.34619 |
| O     | 0.37912 | 0.49810 | 0.35148 |
| O     | 0.87526 | 0.49839 | 0.34594 |
| O     | 0.37611 | 0.99610 | 0.35105 |
| O     | 0.87590 | 0.00185 | 0.34595 |
| O     | 0.11666 | 0.24974 | 0.40434 |
| O     | 0.59956 | 0.25957 | 0.40355 |
| O     | 0.87638 | 0.24975 | 0.40255 |
| O     | 0.11805 | 0.74994 | 0.40314 |
| O     | 0.62117 | 0.74272 | 0.40292 |
| O     | 0.36527 | 0.73923 | 0.41080 |
| O     | 0.88209 | 0.75045 | 0.40196 |
| O     | 0.40589 | 0.88163 | 0.99566 |
| O     | 0.40566 | 0.88259 | 0.46769 |
| O     | 0.42051 | 0.58370 | 0.99998 |
| O     | 0.42079 | 0.58469 | 0.46394 |
| <hr/> |         |         |         |
| C     | 0.39303 | 0.73693 | 0.01291 |
| C     | 0.39300 | 0.73725 | 0.45067 |

**Table S26** - The final minimised structure of the {110}-Redu-CO<sub>3</sub> ⊥ configuration VIIa using PBEsol + U. The ionic positions are given as fractional coordinates and the magnetic vectors are presented.

| Atom | Coordinates (Direct) |         |         | Magnetic Vector (μ <sub>B</sub> ) |       |       |
|------|----------------------|---------|---------|-----------------------------------|-------|-------|
|      | X                    | Y       | Z       | X                                 | Y     | Z     |
| Pu A | 0.00184              | 0.50902 | 0.06374 | -1.79                             | -3.32 | -0.75 |
| Pu A | 0.51147              | 0.50684 | 0.06157 | -0.84                             | 0.00  | 4.73  |
| Pu A | 0.00436              | 0.99635 | 0.17515 | -2.22                             | -3.08 | -0.01 |
| Pu A | 0.50752              | 0.99669 | 0.17477 | -2.22                             | -3.09 | -0.07 |
| Pu A | 0.00449              | 0.49917 | 0.28880 | -2.22                             | -3.08 | -0.01 |
| Pu A | 0.50754              | 0.49836 | 0.28887 | -2.19                             | -3.11 | -0.04 |
| Pu A | 0.00179              | 0.98627 | 0.39966 | 1.80                              | -3.30 | -0.81 |
| Pu A | 0.51176              | 0.98852 | 0.40167 | 0.94                              | -0.85 | -4.64 |
| Pu B | 0.26082              | 0.74733 | 0.11409 | 2.44                              | 0.01  | 2.91  |
| Pu B | 0.75188              | 0.74756 | 0.11494 | 2.43                              | -0.05 | 2.92  |
| Pu B | 0.25641              | 0.24770 | 0.23190 | 2.14                              | 0.00  | 3.14  |
| Pu B | 0.75526              | 0.24778 | 0.23182 | 2.24                              | 0.00  | 3.07  |
| Pu B | 0.26052              | 0.74748 | 0.34947 | 2.36                              | -0.01 | 2.98  |
| Pu B | 0.75179              | 0.74763 | 0.34888 | 2.40                              | 0.00  | 2.94  |
| Pu B | 0.25801              | 0.24709 | 0.11997 | 2.15                              | 0.05  | -3.13 |
| Pu B | 0.75249              | 0.24779 | 0.11398 | 2.23                              | 0.00  | -3.07 |
| Pu C | 0.25665              | 0.74752 | 0.23186 | 2.26                              | 0.00  | -3.05 |
| Pu C | 0.75523              | 0.74747 | 0.23184 | 2.21                              | 0.00  | -3.09 |
| Pu C | 0.25829              | 0.24720 | 0.34388 | 2.12                              | -0.02 | -3.16 |
| Pu C | 0.75272              | 0.24788 | 0.34948 | 2.33                              | 0.00  | -3.01 |
| Pu C | 0.00161              | 0.98639 | 0.06411 | -1.82                             | 3.29  | -0.81 |
| Pu C | 0.51163              | 0.98797 | 0.06207 | -1.02                             | 0.84  | -4.63 |
| Pu D | 0.00436              | 0.49893 | 0.17504 | -2.22                             | 3.08  | -0.01 |
| Pu D | 0.50724              | 0.49849 | 0.17466 | -2.22                             | 3.09  | -0.03 |
| Pu D | 0.00445              | 0.99616 | 0.28872 | -2.22                             | 3.08  | -0.01 |
| Pu D | 0.50762              | 0.99683 | 0.28881 | -2.19                             | 3.11  | -0.04 |
| Pu D | 0.00211              | 0.50900 | 0.39994 | 1.77                              | 3.33  | -0.77 |
| Pu D | 0.51187              | 0.50721 | 0.40195 | 1.00                              | 0.95  | -4.61 |
| O    | 0.11935              | 0.74826 | 0.06137 |                                   |       |       |
| O    | 0.63331              | 0.74816 | 0.06021 |                                   |       |       |
| O    | 0.37746              | 0.74789 | 0.06171 |                                   |       |       |
| O    | 0.88553              | 0.74835 | 0.05826 |                                   |       |       |
| O    | 0.14889              | 0.25111 | 0.05088 |                                   |       |       |
| O    | 0.62677              | 0.24745 | 0.06202 |                                   |       |       |
| O    | 0.35427              | 0.24852 | 0.05150 |                                   |       |       |
| O    | 0.90493              | 0.24741 | 0.06210 |                                   |       |       |
| O    | 0.12815              | 0.48747 | 0.11530 |                                   |       |       |
| O    | 0.63346              | 0.49946 | 0.11887 |                                   |       |       |
| O    | 0.12833              | 0.00789 | 0.11549 |                                   |       |       |
| O    | 0.63421              | 0.99576 | 0.11914 |                                   |       |       |
| O    | 0.37919              | 0.48737 | 0.11759 |                                   |       |       |
| O    | 0.88240              | 0.50293 | 0.11646 |                                   |       |       |
| O    | 0.37971              | 0.00767 | 0.11769 |                                   |       |       |
| O    | 0.88258              | 0.99231 | 0.11664 |                                   |       |       |
| O    | 0.13140              | 0.24772 | 0.17502 |                                   |       |       |

|       |         |         |         |
|-------|---------|---------|---------|
| O     | 0.63043 | 0.24787 | 0.17446 |
| O     | 0.38014 | 0.24738 | 0.17556 |
| O     | 0.88169 | 0.24770 | 0.17374 |
| O     | 0.13067 | 0.74753 | 0.17319 |
| O     | 0.63040 | 0.74731 | 0.17509 |
| O     | 0.38132 | 0.74766 | 0.17356 |
| O     | 0.88092 | 0.74756 | 0.17476 |
| O     | 0.12995 | 0.99590 | 0.23194 |
| O     | 0.63180 | 0.99808 | 0.23179 |
| O     | 0.12988 | 0.49932 | 0.23194 |
| O     | 0.63164 | 0.49711 | 0.23181 |
| O     | 0.38011 | 0.99551 | 0.23184 |
| O     | 0.88147 | 0.99890 | 0.23186 |
| O     | 0.38007 | 0.49957 | 0.23180 |
| O     | 0.88150 | 0.49634 | 0.23186 |
| O     | 0.13121 | 0.74764 | 0.29070 |
| O     | 0.63057 | 0.74760 | 0.28861 |
| O     | 0.38130 | 0.74739 | 0.29014 |
| O     | 0.88155 | 0.74758 | 0.28877 |
| O     | 0.13178 | 0.24766 | 0.28905 |
| O     | 0.63067 | 0.24768 | 0.28898 |
| O     | 0.38068 | 0.24766 | 0.28801 |
| O     | 0.88158 | 0.24774 | 0.29009 |
| O     | 0.12853 | 0.48864 | 0.34838 |
| O     | 0.63414 | 0.49923 | 0.34457 |
| O     | 0.12851 | 0.00679 | 0.34827 |
| O     | 0.63422 | 0.99627 | 0.34449 |
| O     | 0.37973 | 0.48645 | 0.34622 |
| O     | 0.88277 | 0.50348 | 0.34723 |
| O     | 0.37980 | 0.00837 | 0.34600 |
| O     | 0.88273 | 0.99187 | 0.34708 |
| O     | 0.15011 | 0.25033 | 0.41199 |
| O     | 0.62661 | 0.24774 | 0.40146 |
| O     | 0.35540 | 0.24787 | 0.41312 |
| O     | 0.90541 | 0.24744 | 0.40151 |
| O     | 0.11949 | 0.74809 | 0.40254 |
| O     | 0.63368 | 0.74814 | 0.40347 |
| O     | 0.37806 | 0.74797 | 0.40179 |
| O     | 0.88559 | 0.74813 | 0.40543 |
| O     | 0.25365 | 0.32818 | 0.99471 |
| O     | 0.24988 | 0.30885 | 0.47026 |
| <hr/> |         |         |         |
| C     | 0.25350 | 0.27758 | 0.02948 |
| C     | 0.25318 | 0.27027 | 0.43473 |

**Table S27** - The final minimised structure of the {110}-Stoich-CO<sub>2</sub> || configuration VIIIa using PBEsol + U. The ionic positions are given as fractional coordinates and the magnetic vectors are presented.

| Atom | Coordinates (Direct) |          |         | Magnetic Vector ( $\mu_B$ ) |       |       |
|------|----------------------|----------|---------|-----------------------------|-------|-------|
|      | X                    | Y        | Z       | X                           | Y     | Z     |
| Pu A | 0.00000              | 0.49990  | 0.06440 | -2.00                       | -3.31 | 0.09  |
| Pu A | 0.49991              | 0.50019  | 0.06439 | -2.04                       | -3.28 | -0.15 |
| Pu A | 0.99958              | 0.00001  | 0.17539 | -2.20                       | -3.10 | 0.00  |
| Pu A | 0.49989              | 0.99997  | 0.17537 | -2.20                       | -3.10 | 0.00  |
| Pu A | 0.99976              | 0.49997  | 0.28848 | -2.20                       | -3.10 | 0.00  |
| Pu A | 0.49950              | 0.49998  | 0.28848 | -2.20                       | -3.10 | 0.00  |
| Pu A | 0.99944              | 0.99990  | 0.39879 | -1.86                       | -3.39 | -0.02 |
| Pu A | 0.49970              | 0.00002  | 0.39879 | -1.86                       | -3.39 | 0.02  |
| Pu B | 0.24982              | 0.74998  | 0.11480 | 2.19                        | 0.01  | 3.10  |
| Pu B | 0.74991              | 0.74963  | 0.11455 | 2.19                        | 0.01  | 3.10  |
| Pu B | 0.24968              | 0.25014  | 0.23189 | 2.24                        | 0.00  | 3.07  |
| Pu B | 0.74967              | 0.25019  | 0.23183 | 2.24                        | 0.00  | 3.07  |
| Pu B | 0.24947              | 0.74953  | 0.34918 | 2.19                        | -0.01 | 3.10  |
| Pu B | 0.74954              | 0.75002  | 0.34892 | 2.19                        | 0.00  | 3.11  |
| Pu B | 0.24972              | 0.24994  | 0.11479 | 2.19                        | 0.00  | -3.11 |
| Pu B | 0.74970              | 0.25043  | 0.11455 | 2.19                        | 0.00  | -3.11 |
| Pu C | 0.24969              | 0.74977  | 0.23190 | 2.24                        | 0.00  | -3.07 |
| Pu C | 0.74966              | 0.74982  | 0.23183 | 2.24                        | 0.00  | -3.07 |
| Pu C | 0.24968              | 0.25034  | 0.34919 | 2.19                        | -0.01 | -3.10 |
| Pu C | 0.74964              | 0.24997  | 0.34892 | 2.19                        | 0.00  | -3.11 |
| Pu C | 0.99987              | -0.00004 | 0.06495 | -1.86                       | 3.39  | -0.02 |
| Pu C | 0.49963              | 0.00009  | 0.06492 | -1.85                       | 3.39  | 0.01  |
| Pu D | 0.99959              | 0.49998  | 0.17525 | -2.20                       | 3.10  | 0.00  |
| Pu D | 0.49989              | 0.49999  | 0.17523 | -2.20                       | 3.10  | 0.00  |
| Pu D | 0.99976              | 0.00000  | 0.28835 | -2.20                       | 3.10  | 0.00  |
| Pu D | 0.49950              | 0.99995  | 0.28834 | -2.20                       | 3.10  | 0.00  |
| Pu D | 0.99946              | 0.49982  | 0.39934 | -2.02                       | 3.29  | 0.12  |
| Pu D | 0.49963              | 0.50011  | 0.39934 | -2.02                       | 3.29  | -0.13 |
| O    | 0.11781              | 0.75112  | 0.06109 |                             |       |       |
| O    | 0.61689              | 0.75003  | 0.06096 |                             |       |       |
| O    | 0.38001              | 0.75066  | 0.06055 |                             |       |       |
| O    | 0.88124              | 0.74989  | 0.06062 |                             |       |       |
| O    | 0.11927              | 0.24900  | 0.06070 |                             |       |       |
| O    | 0.61826              | 0.24999  | 0.06066 |                             |       |       |
| O    | 0.38148              | 0.24908  | 0.06092 |                             |       |       |
| O    | 0.88263              | 0.25022  | 0.06093 |                             |       |       |
| O    | 0.12438              | 0.49964  | 0.11724 |                             |       |       |
| O    | 0.62479              | 0.49981  | 0.11740 |                             |       |       |
| O    | 0.12438              | 0.00033  | 0.11762 |                             |       |       |
| O    | 0.62447              | 0.00029  | 0.11742 |                             |       |       |
| O    | 0.37540              | 0.50027  | 0.11722 |                             |       |       |
| O    | 0.87522              | 0.50027  | 0.11733 |                             |       |       |
| O    | 0.37524              | 0.99960  | 0.11755 |                             |       |       |
| O    | 0.87508              | 0.99977  | 0.11743 |                             |       |       |
| O    | 0.12474              | 0.25022  | 0.17437 |                             |       |       |
| O    | 0.62483              | 0.24997  | 0.17430 |                             |       |       |



|       |         |          |         |
|-------|---------|----------|---------|
| O     | 0.37475 | 0.25016  | 0.17434 |
| O     | 0.87466 | 0.25001  | 0.17431 |
| O     | 0.12466 | 0.74971  | 0.17435 |
| O     | 0.62475 | 0.75009  | 0.17431 |
| O     | 0.37468 | 0.74977  | 0.17436 |
| O     | 0.87459 | 0.74998  | 0.17430 |
| O     | 0.12479 | -0.00010 | 0.23185 |
| O     | 0.62480 | 0.00001  | 0.23188 |
| O     | 0.12472 | 0.49999  | 0.23190 |
| O     | 0.62473 | 0.50002  | 0.23184 |
| O     | 0.37456 | 0.00000  | 0.23184 |
| O     | 0.87454 | 0.00001  | 0.23187 |
| O     | 0.37465 | 0.49991  | 0.23187 |
| O     | 0.87463 | 0.50001  | 0.23184 |
| O     | 0.12475 | 0.74996  | 0.28943 |
| O     | 0.62469 | 0.74977  | 0.28936 |
| O     | 0.37462 | 0.74999  | 0.28940 |
| O     | 0.87467 | 0.74978  | 0.28937 |
| O     | 0.12466 | 0.24990  | 0.28940 |
| O     | 0.62460 | 0.25021  | 0.28936 |
| O     | 0.37453 | 0.24994  | 0.28943 |
| O     | 0.87458 | 0.25022  | 0.28936 |
| O     | 0.12432 | 0.50013  | 0.34638 |
| O     | 0.62408 | 0.50029  | 0.34650 |
| O     | 0.12428 | 0.99970  | 0.34631 |
| O     | 0.62417 | 0.99963  | 0.34614 |
| O     | 0.37480 | 0.49974  | 0.34636 |
| O     | 0.87507 | 0.49971  | 0.34650 |
| O     | 0.37490 | 0.00016  | 0.34629 |
| O     | 0.87502 | 0.00035  | 0.34613 |
| O     | 0.11668 | 0.25005  | 0.40281 |
| O     | 0.61775 | 0.24895  | 0.40272 |
| O     | 0.38106 | 0.24997  | 0.40309 |
| O     | 0.87994 | 0.24916  | 0.40309 |
| O     | 0.11807 | 0.74986  | 0.40310 |
| O     | 0.61922 | 0.75077  | 0.40311 |
| O     | 0.38244 | 0.74986  | 0.40280 |
| O     | 0.88142 | 0.75107  | 0.40271 |
| O     | 0.63980 | 0.49822  | 0.47492 |
| O     | 0.15183 | 0.50185  | 0.98911 |
| O     | 0.85640 | 0.50159  | 0.47485 |
| O     | 0.36843 | 0.49936  | 0.98877 |
| <hr/> |         |          |         |
| C     | 0.74811 | 0.49990  | 0.47403 |
| C     | 0.26002 | 0.50063  | 0.98982 |

**Table S28** - The final minimised structure of the {110}-Reduced-CO<sub>2</sub> || configuration IXa using PBEsol + U. The ionic positions are given as fractional coordinates and the magnetic vectors are presented.

| Atom | Coordinates (Direct) |         |         | Magnetic Vector ( $\mu_B$ ) |       |       |
|------|----------------------|---------|---------|-----------------------------|-------|-------|
|      | X                    | Y       | Z       | X                           | Y     | Z     |
| Pu A | 0.98681              | 0.50078 | 0.06459 | -1.89                       | -3.36 | -0.19 |
| Pu A | 0.49467              | 0.51678 | 0.06155 | -1.52                       | -2.11 | -4.04 |
| Pu A | 0.97946              | 0.99787 | 0.17575 | -2.22                       | -3.08 | 0.04  |
| Pu A | 0.48164              | 0.99975 | 0.17420 | -2.22                       | -3.08 | -0.10 |
| Pu A | 0.98012              | 0.50101 | 0.28822 | -2.22                       | -3.09 | 0.02  |
| Pu A | 0.48013              | 0.49980 | 0.28864 | -2.21                       | -3.10 | 0.01  |
| Pu A | 0.98257              | 0.00054 | 0.39908 | -1.74                       | -3.46 | -0.04 |
| Pu A | 0.49080              | 0.98151 | 0.40157 | 1.36                        | -1.94 | -4.18 |
| Pu B | 0.23713              | 0.74946 | 0.11297 | 2.45                        | 0.00  | 2.90  |
| Pu B | 0.73651              | 0.74966 | 0.11503 | 2.28                        | 0.00  | 3.04  |
| Pu B | 0.23168              | 0.24942 | 0.23227 | 2.08                        | 0.00  | 3.18  |
| Pu B | 0.72944              | 0.24997 | 0.23170 | 2.25                        | 0.00  | 3.06  |
| Pu B | 0.23160              | 0.74875 | 0.35012 | 2.12                        | 0.13  | 3.15  |
| Pu B | 0.73661              | 0.75165 | 0.34776 | 2.32                        | -0.03 | 3.01  |
| Pu B | 0.22504              | 0.25004 | 0.11975 | 2.22                        | -0.21 | -3.05 |
| Pu B | 0.72950              | 0.24981 | 0.11374 | 2.18                        | 0.00  | -3.11 |
| Pu C | 0.23029              | 0.74958 | 0.23155 | 2.25                        | 0.01  | -3.06 |
| Pu C | 0.72785              | 0.75012 | 0.23173 | 2.22                        | 0.00  | -3.08 |
| Pu C | 0.22353              | 0.24803 | 0.34532 | -2.71                       | -0.10 | -3.96 |
| Pu C | 0.72948              | 0.25104 | 0.34870 | 2.18                        | 0.06  | -3.11 |
| Pu C | 0.98657              | 0.99920 | 0.06512 | -1.70                       | 3.47  | -0.03 |
| Pu C | 0.49478              | 0.98291 | 0.06215 | -1.22                       | 2.06  | -4.17 |
| Pu D | 0.97950              | 0.50170 | 0.17566 | -2.21                       | 3.09  | 0.04  |
| Pu D | 0.48169              | 0.49963 | 0.17387 | -2.23                       | 3.08  | -0.10 |
| Pu D | 0.98003              | 0.99897 | 0.28809 | -2.22                       | 3.09  | 0.02  |
| Pu D | 0.48014              | 0.99927 | 0.28951 | -2.22                       | 3.09  | 0.01  |
| Pu D | 0.98254              | 0.50012 | 0.39956 | -1.88                       | 3.37  | 0.12  |
| Pu D | 0.49022              | 0.52097 | 0.39973 | -2.10                       | 2.97  | -1.35 |
| O    | 0.10285              | 0.74980 | 0.06014 |                             |       |       |
| O    | 0.61784              | 0.74985 | 0.05865 |                             |       |       |
| O    | 0.35933              | 0.74985 | 0.06046 |                             |       |       |
| O    | 0.87013              | 0.75069 | 0.06111 |                             |       |       |
| O    | 0.11702              | 0.24971 | 0.06132 |                             |       |       |
| O    | 0.59372              | 0.24941 | 0.06087 |                             |       |       |
| O    | 0.87089              | 0.24902 | 0.06024 |                             |       |       |
| O    | 0.10675              | 0.50260 | 0.11835 |                             |       |       |
| O    | 0.61214              | 0.50502 | 0.11828 |                             |       |       |
| O    | 0.10642              | 0.99687 | 0.11837 |                             |       |       |
| O    | 0.61219              | 0.99440 | 0.11851 |                             |       |       |
| O    | 0.35694              | 0.48008 | 0.11445 |                             |       |       |
| O    | 0.86048              | 0.49766 | 0.11681 |                             |       |       |
| O    | 0.35683              | 0.01912 | 0.11459 |                             |       |       |
| O    | 0.86030              | 0.00196 | 0.11714 |                             |       |       |
| O    | 0.10392              | 0.24963 | 0.17490 |                             |       |       |
| O    | 0.60446              | 0.24982 | 0.17342 |                             |       |       |
| O    | 0.35431              | 0.24947 | 0.17582 |                             |       |       |

|       |         |         |         |
|-------|---------|---------|---------|
| O     | 0.85435 | 0.25008 | 0.17456 |
| O     | 0.10498 | 0.74980 | 0.17519 |
| O     | 0.60510 | 0.74975 | 0.17531 |
| O     | 0.35700 | 0.74967 | 0.17129 |
| O     | 0.85520 | 0.74972 | 0.17444 |
| O     | 0.10574 | 0.00099 | 0.23174 |
| O     | 0.60425 | 0.00279 | 0.23201 |
| O     | 0.10568 | 0.49823 | 0.23178 |
| O     | 0.60438 | 0.49725 | 0.23180 |
| O     | 0.35603 | 0.99361 | 0.23176 |
| O     | 0.85420 | 0.99873 | 0.23186 |
| O     | 0.35591 | 0.50509 | 0.23142 |
| O     | 0.85427 | 0.50145 | 0.23189 |
| O     | 0.10625 | 0.74971 | 0.28845 |
| O     | 0.60528 | 0.75060 | 0.28896 |
| O     | 0.35523 | 0.74840 | 0.29136 |
| O     | 0.85564 | 0.75017 | 0.28938 |
| O     | 0.10166 | 0.24958 | 0.28815 |
| O     | 0.60528 | 0.25020 | 0.29052 |
| O     | 0.35861 | 0.24925 | 0.28709 |
| O     | 0.85294 | 0.25062 | 0.28947 |
| O     | 0.10170 | 0.50865 | 0.34621 |
| O     | 0.60905 | 0.50667 | 0.34595 |
| O     | 0.10108 | 0.98972 | 0.34608 |
| O     | 0.61157 | 0.99720 | 0.34674 |
| O     | 0.36072 | 0.49145 | 0.34915 |
| O     | 0.85684 | 0.49777 | 0.34648 |
| O     | 0.35807 | 0.00202 | 0.34951 |
| O     | 0.85731 | 0.00457 | 0.34609 |
| O     | 0.10066 | 0.25012 | 0.40542 |
| O     | 0.57056 | 0.26269 | 0.40359 |
| O     | 0.85720 | 0.25032 | 0.40327 |
| O     | 0.10262 | 0.75047 | 0.40493 |
| O     | 0.61387 | 0.74212 | 0.40508 |
| O     | 0.36268 | 0.73620 | 0.40554 |
| O     | 0.86726 | 0.75254 | 0.40179 |
| O     | 0.86132 | 0.50414 | 0.98797 |
| O     | 0.84105 | 0.51390 | 0.47544 |
| O     | 0.64502 | 0.49528 | 0.98455 |
| O     | 0.62474 | 0.50042 | 0.47775 |
| <hr/> |         |         |         |
| C     | 0.75288 | 0.49987 | 0.98710 |
| C     | 0.73283 | 0.50747 | 0.47573 |

## Section S6: Surface Structure and Magnetisation - {111} Adsorption

**Table S29** - The final minimised structure of the {111}-Stoich-CO<sub>3</sub>  $\angle$  configuration Xa using PBEsol + U. The ionic positions are given as fractional coordinates and the magnetic vectors are presented.

| Atom | Coordinates (Direct) |         |         | Magnetic Vector ( $\mu_B$ ) |       |       |
|------|----------------------|---------|---------|-----------------------------|-------|-------|
|      | X                    | Y       | Z       | X                           | Y     | Z     |
| Pu A | 0.67422              | 0.65867 | 0.08555 | -3.08                       | -2.09 | -0.85 |
| Pu A | 0.33768              | 0.33193 | 0.17404 | -3.10                       | -1.82 | -1.24 |
| Pu A | 0.00341              | 0.00048 | 0.26655 | -3.10                       | -1.80 | -1.25 |
| Pu A | 0.66918              | 0.66899 | 0.35905 | -3.10                       | -1.82 | -1.23 |
| Pu A | 0.33271              | 0.34208 | 0.44755 | -3.08                       | -2.09 | -0.87 |
| Pu B | 0.67784              | 0.17096 | 0.08213 | 0.29                        | 3.55  | -1.36 |
| Pu B | 0.33588              | 0.83571 | 0.17464 | 0.00                        | 3.59  | -1.25 |
| Pu B | 0.00342              | 0.50048 | 0.26655 | -0.01                       | 3.59  | -1.25 |
| Pu B | 0.67097              | 0.16517 | 0.35845 | 0.00                        | 3.59  | -1.25 |
| Pu B | 0.32900              | 0.82989 | 0.45096 | 0.26                        | 3.54  | -1.38 |
| Pu C | 0.16955              | 0.66727 | 0.08377 | 3.09                        | -2.03 | -0.96 |
| Pu C | 0.83724              | 0.33258 | 0.17548 | 3.09                        | -1.80 | -1.28 |
| Pu C | 0.50342              | 0.00048 | 0.26655 | 3.10                        | -1.80 | -1.25 |
| Pu C | 0.16961              | 0.66830 | 0.35761 | 3.09                        | -1.80 | -1.28 |
| Pu C | 0.83733              | 0.33356 | 0.44933 | 3.08                        | -2.05 | -0.96 |
| Pu D | 0.15914              | 0.17096 | 0.08223 | -0.11                       | -0.14 | 3.79  |
| Pu D | 0.83561              | 0.83561 | 0.17465 | 0.00                        | 0.01  | 3.80  |
| Pu D | 0.50342              | 0.50047 | 0.26655 | -0.03                       | 0.01  | 3.80  |
| Pu D | 0.17123              | 0.16529 | 0.35844 | 0.01                        | 0.01  | 3.80  |
| Pu D | 0.84778              | 0.82981 | 0.45089 | 0.03                        | -0.19 | 3.79  |
| O    | 0.00630              | 0.99498 | 0.06243 |                             |       |       |
| O    | 0.50306              | 0.50905 | 0.06468 |                             |       |       |
| O    | 0.51298              | 0.98091 | 0.05534 |                             |       |       |
| O    | 0.99616              | 0.50900 | 0.06458 |                             |       |       |
| O    | 0.33907              | 0.84339 | 0.10713 |                             |       |       |
| O    | 0.83874              | 0.33003 | 0.10697 |                             |       |       |
| O    | 0.82607              | 0.84269 | 0.10693 |                             |       |       |
| O    | 0.34481              | 0.31786 | 0.10473 |                             |       |       |
| O    | 0.67216              | 0.66319 | 0.15197 |                             |       |       |
| O    | 0.16642              | 0.17023 | 0.15222 |                             |       |       |
| O    | 0.17137              | 0.66464 | 0.14982 |                             |       |       |
| O    | 0.67063              | 0.16994 | 0.15209 |                             |       |       |
| O    | 0.00405              | 0.50269 | 0.19776 |                             |       |       |
| O    | 0.50391              | 0.99948 | 0.19730 |                             |       |       |
| O    | 0.50079              | 0.50242 | 0.19775 |                             |       |       |
| O    | 0.00497              | 0.99719 | 0.19774 |                             |       |       |
| O    | 0.33718              | 0.33297 | 0.24339 |                             |       |       |
| O    | 0.83609              | 0.83444 | 0.24366 |                             |       |       |
| O    | 0.83699              | 0.33344 | 0.24374 |                             |       |       |
| O    | 0.33676              | 0.83441 | 0.24370 |                             |       |       |
| O    | 0.67005              | 0.16652 | 0.28940 |                             |       |       |
| O    | 0.16982              | 0.66750 | 0.28937 |                             |       |       |
| O    | 0.17075              | 0.16652 | 0.28943 |                             |       |       |

|       |         |         |         |
|-------|---------|---------|---------|
| O     | 0.66966 | 0.66801 | 0.28971 |
| O     | 0.00184 | 0.00376 | 0.33536 |
| O     | 0.50607 | 0.49847 | 0.33534 |
| O     | 0.50290 | 0.00144 | 0.33580 |
| O     | 0.00280 | 0.49820 | 0.33534 |
| O     | 0.33621 | 0.83093 | 0.38099 |
| O     | 0.83545 | 0.33625 | 0.38328 |
| O     | 0.84047 | 0.83063 | 0.38086 |
| O     | 0.33472 | 0.33767 | 0.38113 |
| O     | 0.66204 | 0.68313 | 0.42837 |
| O     | 0.18084 | 0.15808 | 0.42616 |
| O     | 0.16808 | 0.67081 | 0.42614 |
| O     | 0.66776 | 0.15735 | 0.42597 |
| O     | 0.01079 | 0.49167 | 0.46850 |
| O     | 0.49382 | 0.02002 | 0.47785 |
| O     | 0.50389 | 0.49172 | 0.46838 |
| O     | 0.00055 | 0.00583 | 0.47067 |
| O     | 0.56137 | 0.17954 | 0.01449 |
| O     | 0.44538 | 0.82087 | 0.51856 |
| O     | 0.26366 | 0.17656 | 0.01461 |
| O     | 0.74337 | 0.82336 | 0.51846 |
| <hr/> |         |         |         |
| C     | 0.44382 | 0.11672 | 0.02438 |
| C     | 0.56305 | 0.88366 | 0.50872 |

**Table S30** - The final minimised structure of the {111}-Stoich-CO<sub>3</sub> ⊥ configuration XIa using PBEsol + U. The ionic positions are given as fractional coordinates and the magnetic vectors are presented.

| Atom | Coordinates (Direct) |         |         | Magnetic Vector (μ <sub>B</sub> ) |       |       |
|------|----------------------|---------|---------|-----------------------------------|-------|-------|
|      | X                    | Y       | Z       | X                                 | Y     | Z     |
| Pu A | 0.66645              | 0.65742 | 0.08315 | -3.09                             | -2.15 | -0.69 |
| Pu A | 0.33200              | 0.33086 | 0.17299 | -3.09                             | -1.82 | -1.26 |
| Pu A | 0.99772              | 0.99862 | 0.26548 | -3.10                             | -1.80 | -1.25 |
| Pu A | 0.66499              | 0.66576 | 0.35697 | -3.08                             | -1.81 | -1.30 |
| Pu A | 0.32861              | 0.33957 | 0.45024 | -2.76                             | -2.19 | -1.44 |
| Pu B | 0.66743              | 0.16994 | 0.08024 | 0.50                              | 3.48  | -1.47 |
| Pu B | 0.33063              | 0.83294 | 0.17351 | 0.00                              | 3.58  | -1.27 |
| Pu B | 0.99792              | 0.49854 | 0.26501 | 0.00                              | 3.59  | -1.25 |
| Pu B | 0.66361              | 0.16521 | 0.35752 | 0.05                              | 3.58  | -1.28 |
| Pu B | 0.32935              | 0.82603 | 0.44729 | 0.32                              | 3.75  | -0.69 |
| Pu C | 0.16310              | 0.66662 | 0.08227 | 3.18                              | -1.94 | -0.85 |
| Pu C | 0.82991              | 0.33122 | 0.17406 | 3.08                              | -1.80 | -1.31 |
| Pu C | 0.49784              | 0.99874 | 0.26525 | 3.11                              | -1.79 | -1.26 |
| Pu C | 0.16581              | 0.66334 | 0.35643 | 3.10                              | -1.77 | -1.31 |
| Pu C | 0.83248              | 0.33208 | 0.44819 | 3.27                              | -1.77 | -0.87 |
| Pu D | 0.15476              | 0.16942 | 0.08300 | 0.31                              | -0.18 | 3.77  |
| Pu D | 0.82929              | 0.83384 | 0.17304 | 0.00                              | -0.01 | 3.80  |
| Pu D | 0.49782              | 0.49840 | 0.26523 | -0.02                             | 0.01  | 3.80  |
| Pu D | 0.16637              | 0.16542 | 0.35745 | 0.00                              | 0.00  | 3.80  |
| Pu D | 0.84114              | 0.82619 | 0.44748 | -3.00                             | 1.89  | 1.40  |
| O    | 0.00593              | 0.99511 | 0.06248 |                                   |       |       |
| O    | 0.49353              | 0.50750 | 0.06276 |                                   |       |       |
| O    | 0.48769              | 0.99029 | 0.05374 |                                   |       |       |
| O    | 0.99652              | 0.49847 | 0.06156 |                                   |       |       |
| O    | 0.33627              | 0.83932 | 0.10627 |                                   |       |       |
| O    | 0.83019              | 0.33136 | 0.10577 |                                   |       |       |
| O    | 0.81914              | 0.83838 | 0.10437 |                                   |       |       |
| O    | 0.33633              | 0.32019 | 0.10457 |                                   |       |       |
| O    | 0.66666              | 0.66191 | 0.15030 |                                   |       |       |
| O    | 0.16042              | 0.16814 | 0.15063 |                                   |       |       |
| O    | 0.16335              | 0.66500 | 0.14853 |                                   |       |       |
| O    | 0.66512              | 0.16626 | 0.15121 |                                   |       |       |
| O    | 0.99821              | 0.50014 | 0.19639 |                                   |       |       |
| O    | 0.49699              | 0.99773 | 0.19606 |                                   |       |       |
| O    | 0.49475              | 0.50101 | 0.19642 |                                   |       |       |
| O    | 0.99974              | 0.99568 | 0.19645 |                                   |       |       |
| O    | 0.33190              | 0.33108 | 0.24207 |                                   |       |       |
| O    | 0.83046              | 0.83305 | 0.24219 |                                   |       |       |
| O    | 0.83108              | 0.33108 | 0.24239 |                                   |       |       |
| O    | 0.33085              | 0.83241 | 0.24262 |                                   |       |       |
| O    | 0.66366              | 0.16529 | 0.28841 |                                   |       |       |
| O    | 0.16465              | 0.66427 | 0.28808 |                                   |       |       |
| O    | 0.16523              | 0.16567 | 0.28832 |                                   |       |       |
| O    | 0.66485              | 0.66539 | 0.28786 |                                   |       |       |

|       |         |         |         |
|-------|---------|---------|---------|
| O     | 0.99735 | 0.00051 | 0.33409 |
| O     | 0.50095 | 0.49807 | 0.33406 |
| O     | 0.49890 | 0.99681 | 0.33444 |
| O     | 0.99586 | 0.49777 | 0.33406 |
| O     | 0.32894 | 0.83095 | 0.38015 |
| O     | 0.83233 | 0.33052 | 0.38192 |
| O     | 0.83542 | 0.83073 | 0.38006 |
| O     | 0.33074 | 0.33353 | 0.37922 |
| O     | 0.65931 | 0.67722 | 0.42419 |
| O     | 0.17644 | 0.16005 | 0.42610 |
| O     | 0.16585 | 0.66349 | 0.42467 |
| O     | 0.65904 | 0.15957 | 0.42592 |
| O     | 0.98983 | 0.50363 | 0.46800 |
| O     | 0.50849 | 0.97987 | 0.47657 |
| O     | 0.50220 | 0.50346 | 0.46777 |
| O     | 0.99910 | 0.99688 | 0.46883 |
| O     | 0.47838 | 0.95749 | 0.98704 |
| O     | 0.52043 | 0.93711 | 0.54332 |
| O     | 0.62417 | 0.12566 | 0.01480 |
| O     | 0.37479 | 0.25130 | 0.51567 |
| <hr/> |         |         |         |
| C     | 0.53116 | 0.02468 | 0.01378 |
| C     | 0.46707 | 0.05735 | 0.51662 |

**Table S31** - The final minimised structure of the {111}-Redu-CO<sub>3</sub>  $\angle$  configuration XIla using PBEsol + U. The ionic positions are given as fractional coordinates and the magnetic vectors are presented.

| Atom | Coordinates (Direct) |         |         | Magnetic Vector ( $\mu_B$ ) |       |       |
|------|----------------------|---------|---------|-----------------------------|-------|-------|
|      | X                    | Y       | Z       | X                           | Y     | Z     |
| Pu A | 0.68058              | 0.67064 | 0.08471 | -3.07                       | -1.79 | -3.22 |
| Pu A | 0.33790              | 0.33253 | 0.17388 | -3.07                       | -1.80 | -1.32 |
| Pu A | 0.00344              | 0.00055 | 0.26660 | -3.09                       | -1.78 | -1.31 |
| Pu A | 0.66901              | 0.66854 | 0.35934 | -3.07                       | -1.80 | -1.32 |
| Pu A | 0.32634              | 0.33048 | 0.44850 | -3.07                       | -1.80 | -3.22 |
| Pu B | 0.69028              | 0.15117 | 0.08521 | -3.56                       | -0.57 | -1.31 |
| Pu B | 0.33610              | 0.83396 | 0.17361 | 0.00                        | 3.58  | -1.27 |
| Pu B | 0.00344              | 0.50053 | 0.26660 | -0.01                       | 3.55  | -1.34 |
| Pu B | 0.67082              | 0.16709 | 0.35960 | 0.00                        | 3.58  | -1.27 |
| Pu B | 0.31666              | 0.84991 | 0.44800 | -3.56                       | -0.57 | -1.31 |
| Pu C | 0.15677              | 0.66873 | 0.08316 | 3.29                        | -1.59 | -3.12 |
| Pu C | 0.83549              | 0.33478 | 0.17537 | 3.07                        | -1.78 | -1.35 |
| Pu C | 0.50345              | 0.00054 | 0.26661 | 3.09                        | -1.78 | -1.31 |
| Pu C | 0.17139              | 0.66631 | 0.35783 | 3.07                        | -1.78 | -1.35 |
| Pu C | 0.85018              | 0.33231 | 0.45005 | 3.30                        | -1.60 | -3.11 |
| Pu D | 0.15410              | 0.17219 | 0.08121 | -0.86                       | -0.06 | 3.69  |
| Pu D | 0.83791              | 0.83224 | 0.17627 | 0.04                        | -0.04 | 3.80  |
| Pu D | 0.50345              | 0.50054 | 0.26661 | -0.03                       | 0.02  | 3.80  |
| Pu D | 0.16900              | 0.16883 | 0.35695 | 0.04                        | -0.04 | 3.80  |
| Pu D | 0.85285              | 0.82888 | 0.45201 | -0.68                       | -0.15 | 3.72  |
| O    | 0.99454              | 0.01094 | 0.05996 |                             |       |       |
| O    | 0.51991              | 0.99883 | 0.05086 |                             |       |       |
| O    | 0.00372              | 0.48952 | 0.06298 |                             |       |       |
| O    | 0.34030              | 0.83518 | 0.10403 |                             |       |       |
| O    | 0.81677              | 0.33860 | 0.10548 |                             |       |       |
| O    | 0.82974              | 0.84075 | 0.10764 |                             |       |       |
| O    | 0.35958              | 0.31986 | 0.10472 |                             |       |       |
| O    | 0.67291              | 0.66628 | 0.15326 |                             |       |       |
| O    | 0.16298              | 0.17186 | 0.14962 |                             |       |       |
| O    | 0.16855              | 0.66548 | 0.15175 |                             |       |       |
| O    | 0.67575              | 0.16295 | 0.15368 |                             |       |       |
| O    | 0.00598              | 0.49786 | 0.19820 |                             |       |       |
| O    | 0.49971              | 0.00163 | 0.19743 |                             |       |       |
| O    | 0.50161              | 0.50132 | 0.19737 |                             |       |       |
| O    | 0.00689              | 0.99932 | 0.19804 |                             |       |       |
| O    | 0.33751              | 0.33346 | 0.24352 |                             |       |       |
| O    | 0.83633              | 0.83408 | 0.24395 |                             |       |       |
| O    | 0.83623              | 0.33395 | 0.24370 |                             |       |       |
| O    | 0.33731              | 0.83345 | 0.24344 |                             |       |       |
| O    | 0.66961              | 0.16763 | 0.28977 |                             |       |       |
| O    | 0.17064              | 0.66715 | 0.28950 |                             |       |       |
| O    | 0.17053              | 0.16698 | 0.28926 |                             |       |       |
| O    | 0.66937              | 0.66760 | 0.28969 |                             |       |       |
| O    | 0.00002              | 0.00176 | 0.33518 |                             |       |       |



|   |         |         |         |
|---|---------|---------|---------|
| O | 0.50525 | 0.49975 | 0.33584 |
| O | 0.50719 | 0.99947 | 0.33579 |
| O | 0.00093 | 0.50320 | 0.33501 |
| O | 0.33119 | 0.83812 | 0.37954 |
| O | 0.83835 | 0.33559 | 0.38146 |
| O | 0.84390 | 0.82921 | 0.38357 |
| O | 0.33400 | 0.33479 | 0.37996 |
| O | 0.64735 | 0.68116 | 0.42849 |
| O | 0.17719 | 0.16032 | 0.42557 |
| O | 0.19004 | 0.66257 | 0.42772 |
| O | 0.66668 | 0.16587 | 0.42920 |
| O | 0.00319 | 0.51157 | 0.47024 |
| O | 0.48699 | 0.00229 | 0.48233 |
| O | 0.01245 | 0.99011 | 0.47327 |
| O | 0.51525 | 0.26802 | 0.02421 |
| O | 0.49172 | 0.73315 | 0.50903 |
| O | 0.26248 | 0.19867 | 0.01207 |
| O | 0.74440 | 0.80268 | 0.52115 |
| C | 0.42888 | 0.16077 | 0.02595 |
| C | 0.57802 | 0.84046 | 0.50727 |

**Table S32** - The final minimised structure of the {111}-Redu-CO<sub>3</sub>  $\angle$  configuration XIIb using PBEsol + U. The ionic positions are given as fractional coordinates and the magnetic vectors are presented.

| Atom | Coordinates (Direct) |         |         | Magnetic Vector ( $\mu_B$ ) |       |       |
|------|----------------------|---------|---------|-----------------------------|-------|-------|
|      | X                    | Y       | Z       | X                           | Y     | Z     |
| Pu A | 0.67283              | 0.64605 | 0.08277 | -2.86                       | -2.49 | -0.50 |
| Pu A | 0.33339              | 0.32535 | 0.17501 | -3.10                       | -1.82 | -1.24 |
| Pu A | 0.99650              | 0.99218 | 0.26528 | -3.10                       | -1.79 | -1.27 |
| Pu A | 0.66497              | 0.65939 | 0.35866 | -3.09                       | -1.81 | -1.28 |
| Pu A | 0.31104              | 0.33141 | 0.44672 | -1.30                       | 3.37  | -1.30 |
| Pu B | 0.65425              | 0.16979 | 0.07970 | -3.59                       | 2.06  | 2.43  |
| Pu B | 0.32831              | 0.82776 | 0.17321 | 0.00                        | 3.63  | -1.14 |
| Pu B | 0.99524              | 0.49475 | 0.26515 | 0.00                        | 3.58  | -1.28 |
| Pu B | 0.66322              | 0.15965 | 0.35821 | 0.04                        | 3.55  | -1.34 |
| Pu B | 0.32036              | 0.84154 | 0.44726 | -0.20                       | 3.37  | -3.41 |
| Pu C | 0.17492              | 0.63960 | 0.08256 | 0.20                        | -3.49 | 3.29  |
| Pu C | 0.83052              | 0.32337 | 0.17405 | 3.11                        | -1.82 | -1.21 |
| Pu C | 0.49942              | 0.99075 | 0.26546 | 3.10                        | -1.79 | -1.27 |
| Pu C | 0.16520              | 0.65981 | 0.35663 | 3.08                        | -1.77 | -1.35 |
| Pu C | 0.84440              | 0.31507 | 0.44892 | 3.08                        | -2.09 | -3.04 |
| Pu D | 0.16300              | 0.17282 | 0.08362 | -0.43                       | 0.41  | 3.78  |
| Pu D | 0.83059              | 0.82787 | 0.17227 | -0.03                       | 0.01  | 3.80  |
| Pu D | 0.49821              | 0.49313 | 0.26580 | -0.01                       | 0.03  | 3.80  |
| Pu D | 0.16294              | 0.15971 | 0.35555 | 0.06                        | -0.02 | 3.80  |
| Pu D | 0.84711              | 0.81598 | 0.45088 | -3.12                       | 1.95  | 0.99  |
| O    | 0.50848              | 0.50617 | 0.06047 |                             |       |       |
| O    | 0.50602              | 0.96403 | 0.05319 |                             |       |       |
| O    | 0.98756              | 0.48834 | 0.06109 |                             |       |       |
| O    | 0.30703              | 0.85225 | 0.10403 |                             |       |       |
| O    | 0.84864              | 0.29963 | 0.10443 |                             |       |       |
| O    | 0.82942              | 0.83333 | 0.10395 |                             |       |       |
| O    | 0.33660              | 0.31022 | 0.10433 |                             |       |       |
| O    | 0.66280              | 0.65350 | 0.14849 |                             |       |       |
| O    | 0.16383              | 0.16574 | 0.15234 |                             |       |       |
| O    | 0.17010              | 0.65150 | 0.15080 |                             |       |       |
| O    | 0.66017              | 0.16394 | 0.15225 |                             |       |       |
| O    | 0.99223              | 0.49731 | 0.19674 |                             |       |       |
| O    | 0.50068              | 0.98624 | 0.19633 |                             |       |       |
| O    | 0.49791              | 0.49622 | 0.19735 |                             |       |       |
| O    | 0.99866              | 0.98967 | 0.19594 |                             |       |       |
| O    | 0.33099              | 0.32490 | 0.24245 |                             |       |       |
| O    | 0.83070              | 0.82754 | 0.24231 |                             |       |       |
| O    | 0.83193              | 0.32368 | 0.24250 |                             |       |       |
| O    | 0.32883              | 0.82771 | 0.24249 |                             |       |       |
| O    | 0.66238              | 0.16050 | 0.28861 |                             |       |       |
| O    | 0.16518              | 0.65800 | 0.28829 |                             |       |       |
| O    | 0.16466              | 0.15977 | 0.28806 |                             |       |       |
| O    | 0.66345              | 0.65928 | 0.28845 |                             |       |       |
| O    | 0.99467              | 0.99279 | 0.33366 |                             |       |       |

|       |         |         |         |
|-------|---------|---------|---------|
| O     | 0.49969 | 0.49257 | 0.33484 |
| O     | 0.50215 | 0.98956 | 0.33463 |
| O     | 0.99292 | 0.49651 | 0.33397 |
| O     | 0.32763 | 0.82898 | 0.37871 |
| O     | 0.83294 | 0.32298 | 0.38028 |
| O     | 0.83792 | 0.82465 | 0.38260 |
| O     | 0.32523 | 0.32817 | 0.37821 |
| O     | 0.66064 | 0.66446 | 0.42799 |
| O     | 0.17155 | 0.16039 | 0.42437 |
| O     | 0.18415 | 0.64539 | 0.42648 |
| O     | 0.64174 | 0.16927 | 0.42725 |
| O     | 0.00638 | 0.49592 | 0.47201 |
| O     | 0.48274 | 0.00854 | 0.48105 |
| O     | 0.99763 | 0.98284 | 0.46908 |
| O     | 0.53561 | 0.15971 | 0.00832 |
| O     | 0.73814 | 0.95263 | 0.52031 |
| O     | 0.24517 | 0.14311 | 0.01384 |
| O     | 0.48635 | 0.27427 | 0.50749 |
| <hr/> |         |         |         |
| C     | 0.42762 | 0.09243 | 0.02125 |
| C     | 0.57279 | 0.08046 | 0.50605 |

**Table S33** - The final minimised structure of the {111}-Stoich-CO<sub>2</sub>  $\angle$  configuration XIIIa using PBEsol + U. The ionic positions are given as fractional coordinates and the magnetic vectors are presented.

| Atom | Coordinates (Direct) |         |         | Magnetic Vector ( $\mu_B$ ) |       |       |
|------|----------------------|---------|---------|-----------------------------|-------|-------|
|      | X                    | Y       | Z       | X                           | Y     | Z     |
| Pu A | 0.66696              | 0.66638 | 0.08252 | -3.22                       | -1.83 | -0.94 |
| Pu A | 0.33294              | 0.33379 | 0.17334 | -3.09                       | -1.78 | -1.30 |
| Pu A | 0.00011              | 0.99990 | 0.26521 | -3.10                       | -1.79 | -1.26 |
| Pu A | 0.66659              | 0.66686 | 0.35711 | -3.09                       | -1.79 | -1.29 |
| Pu A | 0.33356              | 0.33280 | 0.44778 | -3.20                       | -1.88 | -0.90 |
| Pu B | 0.66682              | 0.16648 | 0.08269 | -0.01                       | 3.71  | -0.92 |
| Pu B | 0.33315              | 0.83331 | 0.17334 | 0.00                        | 3.57  | -1.30 |
| Pu B | 0.00009              | 0.49993 | 0.26531 | 0.00                        | 3.58  | -1.26 |
| Pu B | 0.66702              | 0.16604 | 0.35699 | 0.00                        | 3.57  | -1.29 |
| Pu B | 0.33409              | 0.83205 | 0.44849 | 0.00                        | 3.69  | -1.01 |
| Pu C | 0.16553              | 0.66828 | 0.08193 | 3.18                        | -1.82 | -1.10 |
| Pu C | 0.83347              | 0.33346 | 0.17348 | 3.09                        | -1.78 | -1.31 |
| Pu C | 0.50001              | 0.99994 | 0.26516 | 3.10                        | -1.79 | -1.27 |
| Pu C | 0.16667              | 0.66685 | 0.35712 | 3.09                        | -1.78 | -1.29 |
| Pu C | 0.83389              | 0.33279 | 0.44779 | 3.20                        | -1.89 | -0.89 |
| Pu D | 0.16660              | 0.16686 | 0.08253 | -0.01                       | 0.04  | 3.79  |
| Pu D | 0.83365              | 0.83311 | 0.17340 | 0.00                        | 0.00  | 3.80  |
| Pu D | 0.49999              | 0.49999 | 0.26525 | 0.00                        | 0.00  | 3.80  |
| Pu D | 0.16707              | 0.16601 | 0.35707 | 0.00                        | 0.00  | 3.80  |
| Pu D | 0.83333              | 0.83346 | 0.44813 | -0.01                       | -0.09 | 3.79  |
| O    | 0.99812              | 0.00360 | 0.06088 |                             |       |       |
| O    | 0.50187              | 0.49764 | 0.05983 |                             |       |       |
| O    | 0.50000              | 0.00014 | 0.06032 |                             |       |       |
| O    | 0.00057              | 0.49760 | 0.05954 |                             |       |       |
| O    | 0.33368              | 0.83240 | 0.10545 |                             |       |       |
| O    | 0.83316              | 0.33494 | 0.10596 |                             |       |       |
| O    | 0.83431              | 0.83166 | 0.10533 |                             |       |       |
| O    | 0.33204              | 0.33484 | 0.10560 |                             |       |       |
| O    | 0.66631              | 0.66755 | 0.14995 |                             |       |       |
| O    | 0.16707              | 0.16625 | 0.15018 |                             |       |       |
| O    | 0.16618              | 0.66740 | 0.14993 |                             |       |       |
| O    | 0.66677              | 0.16612 | 0.14988 |                             |       |       |
| O    | 0.99986              | 0.50006 | 0.19629 |                             |       |       |
| O    | 0.50009              | 0.00021 | 0.19633 |                             |       |       |
| O    | 0.50019              | 0.49980 | 0.19627 |                             |       |       |
| O    | 0.99965              | 0.00035 | 0.19634 |                             |       |       |
| O    | 0.33308              | 0.33363 | 0.24234 |                             |       |       |
| O    | 0.83360              | 0.83305 | 0.24229 |                             |       |       |
| O    | 0.83337              | 0.33348 | 0.24241 |                             |       |       |
| O    | 0.33336              | 0.83312 | 0.24228 |                             |       |       |
| O    | 0.66681              | 0.16634 | 0.28806 |                             |       |       |
| O    | 0.16662              | 0.66686 | 0.28820 |                             |       |       |
| O    | 0.16691              | 0.16627 | 0.28815 |                             |       |       |
| O    | 0.66657              | 0.66690 | 0.28817 |                             |       |       |

|       |         |         |         |
|-------|---------|---------|---------|
| O     | 0.00001 | 0.00026 | 0.33418 |
| O     | 0.50030 | 0.49951 | 0.33415 |
| O     | 0.49980 | 0.00027 | 0.33416 |
| O     | 0.00041 | 0.49930 | 0.33415 |
| O     | 0.33369 | 0.83281 | 0.38052 |
| O     | 0.83352 | 0.33357 | 0.38060 |
| O     | 0.83378 | 0.83250 | 0.38021 |
| O     | 0.33307 | 0.33355 | 0.38060 |
| O     | 0.66620 | 0.66864 | 0.42500 |
| O     | 0.16771 | 0.16477 | 0.42501 |
| O     | 0.16532 | 0.66871 | 0.42499 |
| O     | 0.66830 | 0.16373 | 0.42453 |
| O     | 0.00021 | 0.49989 | 0.47013 |
| O     | 0.49954 | 0.00233 | 0.47092 |
| O     | 0.50192 | 0.49625 | 0.46927 |
| O     | 0.99846 | 0.00229 | 0.47096 |
| O     | 0.16610 | 0.15843 | 0.55938 |
| O     | 0.33371 | 0.83200 | 0.53270 |
| O     | 0.16641 | 0.66761 | 0.99776 |
| O     | 0.33224 | 0.34238 | 0.97053 |
| <hr/> |         |         |         |
| C     | 0.25000 | 0.50378 | 0.98439 |
| C     | 0.24921 | 0.99643 | 0.54579 |

**Table S34** - The final minimised structure of the {111}-Redu-CO<sub>2</sub>  $\angle$  configuration XIVa using PBEsol + U. The ionic positions are given as fractional coordinates and the magnetic vectors are presented.

| Atom | Coordinates (Direct) |         |         | Magnetic Vector ( $\mu_B$ ) |       |       |
|------|----------------------|---------|---------|-----------------------------|-------|-------|
|      | X                    | Y       | Z       | X                           | Y     | Z     |
| Pu A | 0.64715              | 0.66366 | 0.08072 | -3.25                       | -1.91 | -0.63 |
| Pu A | 0.31244              | 0.33341 | 0.17529 | -3.07                       | -1.81 | -1.32 |
| Pu A | 0.97734              | 0.99781 | 0.26511 | -3.10                       | -1.79 | -1.28 |
| Pu A | 0.64327              | 0.66556 | 0.35760 | -3.05                       | -1.74 | -1.44 |
| Pu A | 0.30097              | 0.32332 | 0.44842 | -2.86                       | -1.95 | -3.32 |
| Pu B | 0.62493              | 0.17471 | 0.08183 | -2.89                       | 1.90  | 3.32  |
| Pu B | 0.31004              | 0.83223 | 0.17298 | 0.04                        | 3.60  | -1.22 |
| Pu B | 0.97605              | 0.50097 | 0.26516 | 0.00                        | 3.57  | -1.29 |
| Pu B | 0.64280              | 0.16757 | 0.35745 | -0.01                       | 3.53  | -1.39 |
| Pu B | 0.30245              | 0.84858 | 0.44796 | 0.37                        | 3.32  | -3.44 |
| Pu C | 0.15287              | 0.64931 | 0.08230 | 0.31                        | -3.40 | 3.37  |
| Pu C | 0.81163              | 0.33003 | 0.17309 | 3.13                        | -1.81 | -1.18 |
| Pu C | 0.48007              | 0.99674 | 0.26499 | 3.09                        | -1.79 | -1.29 |
| Pu C | 0.14508              | 0.66520 | 0.35808 | 3.08                        | -1.76 | -1.35 |
| Pu C | 0.82947              | 0.32443 | 0.44603 | 2.62                        | -0.97 | -2.60 |
| Pu D | 0.15241              | 0.17507 | 0.08455 | -2.46                       | 2.69  | 1.23  |
| Pu D | 0.81179              | 0.83254 | 0.17214 | -0.04                       | 0.00  | 3.80  |
| Pu D | 0.47828              | 0.49947 | 0.26554 | 0.03                        | 0.01  | 3.80  |
| Pu D | 0.14659              | 0.16445 | 0.35505 | -0.01                       | 0.00  | 3.80  |
| Pu D | 0.81061              | 0.83645 | 0.44967 | 0.32                        | -3.63 | 1.12  |
| O    | 0.48716              | 0.51209 | 0.05694 |                             |       |       |
| O    | 0.46573              | 0.99125 | 0.05600 |                             |       |       |
| O    | 0.97449              | 0.48666 | 0.05773 |                             |       |       |
| O    | 0.29022              | 0.85083 | 0.10482 |                             |       |       |
| O    | 0.83060              | 0.30538 | 0.10369 |                             |       |       |
| O    | 0.81279              | 0.83705 | 0.10304 |                             |       |       |
| O    | 0.30970              | 0.32926 | 0.10633 |                             |       |       |
| O    | 0.64452              | 0.66095 | 0.14734 |                             |       |       |
| O    | 0.14730              | 0.16980 | 0.15187 |                             |       |       |
| O    | 0.14726              | 0.66085 | 0.15151 |                             |       |       |
| O    | 0.63997              | 0.16865 | 0.15143 |                             |       |       |
| O    | 0.97249              | 0.50219 | 0.19652 |                             |       |       |
| O    | 0.48154              | 0.99284 | 0.19628 |                             |       |       |
| O    | 0.48017              | 0.50101 | 0.19688 |                             |       |       |
| O    | 0.97786              | 0.99808 | 0.19565 |                             |       |       |
| O    | 0.31117              | 0.33172 | 0.24253 |                             |       |       |
| O    | 0.81193              | 0.83289 | 0.24204 |                             |       |       |
| O    | 0.81232              | 0.33024 | 0.24220 |                             |       |       |
| O    | 0.30964              | 0.83311 | 0.24228 |                             |       |       |
| O    | 0.64332              | 0.16699 | 0.28827 |                             |       |       |
| O    | 0.14597              | 0.66411 | 0.28846 |                             |       |       |
| O    | 0.14482              | 0.16583 | 0.28774 |                             |       |       |
| O    | 0.64416              | 0.66474 | 0.28806 |                             |       |       |
| O    | 0.97546              | 0.99644 | 0.33383 |                             |       |       |

|       |         |         |         |
|-------|---------|---------|---------|
| O     | 0.47837 | 0.49916 | 0.33478 |
| O     | 0.48278 | 0.99594 | 0.33363 |
| O     | 0.97471 | 0.50415 | 0.33411 |
| O     | 0.30910 | 0.83631 | 0.37873 |
| O     | 0.81826 | 0.32760 | 0.37898 |
| O     | 0.80691 | 0.83640 | 0.38295 |
| O     | 0.31003 | 0.32946 | 0.37883 |
| O     | 0.64153 | 0.64787 | 0.42563 |
| O     | 0.14170 | 0.16798 | 0.42386 |
| O     | 0.15121 | 0.66066 | 0.42730 |
| O     | 0.63775 | 0.19010 | 0.42688 |
| O     | 0.95836 | 0.50533 | 0.47408 |
| O     | 0.50060 | 0.98519 | 0.47378 |
| O     | 0.96269 | 0.01192 | 0.47259 |
| O     | 0.72128 | 0.71119 | 0.54939 |
| O     | 0.56939 | 0.57049 | 0.51042 |
| O     | 0.14150 | 0.94885 | 0.02037 |
| O     | 0.43299 | 0.81128 | 0.98114 |
| <hr/> |         |         |         |
| C     | 0.29590 | 0.88001 | 0.00256 |
| C     | 0.65054 | 0.64270 | 0.52852 |

**Table S35** - The final minimised structure of the {111}-Redu-CO<sub>2</sub>  $\angle$  configuration XIVb using PBEsol + U. The ionic positions are given as fractional coordinates and the magnetic vectors are presented.

| Atom | Coordinates (Direct) |          |         | Magnetic Vector ( $\mu_B$ ) |       |       |
|------|----------------------|----------|---------|-----------------------------|-------|-------|
|      | X                    | Y        | Z       | X                           | Y     | Z     |
| Pu A | 0.67849              | 0.67811  | 0.08391 | -0.99                       | -0.56 | -3.64 |
| Pu A | 0.33335              | 0.33327  | 0.17246 | -3.08                       | -1.78 | -1.32 |
| Pu A | 0.00002              | 0.99998  | 0.26523 | -3.07                       | -1.77 | -1.35 |
| Pu A | 0.66651              | 0.66654  | 0.35801 | -3.09                       | -1.75 | -1.35 |
| Pu A | 0.32135              | 0.32207  | 0.44655 | -0.94                       | -0.60 | -3.65 |
| Pu B | 0.67420              | 0.15145  | 0.08241 | -0.11                       | 3.62  | -3.14 |
| Pu B | 0.33424              | 0.83135  | 0.17293 | 0.00                        | 3.54  | -1.38 |
| Pu B | -0.00001             | 0.50000  | 0.26524 | 0.00                        | 3.56  | -1.33 |
| Pu B | 0.66578              | 0.16875  | 0.35748 | 0.00                        | 3.54  | -1.38 |
| Pu B | 0.32571              | 0.84857  | 0.44808 | -0.10                       | 3.57  | -3.20 |
| Pu C | 0.15177              | 0.67380  | 0.08241 | 3.09                        | -1.92 | -3.13 |
| Pu C | 0.83136              | 0.33418  | 0.17293 | 3.06                        | -1.77 | -1.38 |
| Pu C | 0.50002              | -0.00003 | 0.26523 | 3.08                        | -1.78 | -1.33 |
| Pu C | 0.16891              | 0.66573  | 0.35750 | 3.06                        | -1.75 | -1.40 |
| Pu C | 0.84857              | 0.32621  | 0.44806 | 3.04                        | -1.91 | -3.18 |
| Pu D | 0.16612              | 0.16538  | 0.08055 | -0.07                       | -0.56 | 3.74  |
| Pu D | 0.83463              | 0.83451  | 0.17522 | 0.02                        | 0.01  | 3.80  |
| Pu D | 0.50001              | 0.50000  | 0.26520 | -0.01                       | -0.01 | 3.80  |
| Pu D | 0.16546              | 0.16546  | 0.35524 | 0.02                        | 0.01  | 3.80  |
| Pu D | 0.83322              | 0.83581  | 0.44963 | -0.22                       | -3.66 | 1.07  |
| O    | 0.00998              | 0.00955  | 0.05818 |                             |       |       |
| O    | 0.49413              | 0.99211  | 0.05627 |                             |       |       |
| O    | 0.99231              | 0.49399  | 0.05634 |                             |       |       |
| O    | 0.35625              | 0.80815  | 0.10356 |                             |       |       |
| O    | 0.80804              | 0.35612  | 0.10357 |                             |       |       |
| O    | 0.83148              | 0.83123  | 0.10640 |                             |       |       |
| O    | 0.33480              | 0.33443  | 0.10425 |                             |       |       |
| O    | 0.67056              | 0.67047  | 0.15143 |                             |       |       |
| O    | 0.16306              | 0.16311  | 0.14768 |                             |       |       |
| O    | 0.16306              | 0.67010  | 0.15155 |                             |       |       |
| O    | 0.67023              | 0.16287  | 0.15157 |                             |       |       |
| O    | 0.00229              | 0.49596  | 0.19641 |                             |       |       |
| O    | 0.49598              | 0.00222  | 0.19641 |                             |       |       |
| O    | 0.50012              | 0.50008  | 0.19576 |                             |       |       |
| O    | 0.00198              | 0.00187  | 0.19685 |                             |       |       |
| O    | 0.33374              | 0.33370  | 0.24213 |                             |       |       |
| O    | 0.83329              | 0.83328  | 0.24270 |                             |       |       |
| O    | 0.83234              | 0.33405  | 0.24216 |                             |       |       |
| O    | 0.33408              | 0.83232  | 0.24216 |                             |       |       |
| O    | 0.66594              | 0.16770  | 0.28829 |                             |       |       |
| O    | 0.16772              | 0.66593  | 0.28829 |                             |       |       |
| O    | 0.16673              | 0.16670  | 0.28774 |                             |       |       |
| O    | 0.66625              | 0.66624  | 0.28834 |                             |       |       |
| O    | 0.99799              | 0.99809  | 0.33359 |                             |       |       |



|       |         |         |         |
|-------|---------|---------|---------|
| O     | 0.49994 | 0.49991 | 0.33466 |
| O     | 0.50422 | 0.99768 | 0.33405 |
| O     | 0.99765 | 0.50417 | 0.33407 |
| O     | 0.32978 | 0.83712 | 0.37883 |
| O     | 0.83690 | 0.32981 | 0.37888 |
| O     | 0.83698 | 0.83704 | 0.38287 |
| O     | 0.32971 | 0.32958 | 0.37899 |
| O     | 0.66485 | 0.66530 | 0.42618 |
| O     | 0.16872 | 0.16860 | 0.42399 |
| O     | 0.19225 | 0.64388 | 0.42683 |
| O     | 0.64440 | 0.19070 | 0.42694 |
| O     | 0.00804 | 0.50579 | 0.47394 |
| O     | 0.50598 | 0.00769 | 0.47416 |
| O     | 0.99034 | 0.99053 | 0.47227 |
| O     | 0.26703 | 0.26386 | 0.97789 |
| O     | 0.58703 | 0.59053 | 0.51328 |
| O     | 0.41234 | 0.41017 | 0.01710 |
| O     | 0.73260 | 0.73628 | 0.55257 |
| <hr/> |         |         |         |
| C     | 0.33755 | 0.33473 | 0.99821 |
| C     | 0.66194 | 0.66575 | 0.53221 |

**Table S36** - The final minimised structure of the {111}-Redu-CO<sub>2</sub>  $\angle$  configuration XIVc using PBEsol + U. The ionic positions are given as fractional coordinates and the magnetic vectors are presented.

| Atom | Coordinates (Direct) |         |         | Magnetic Vector ( $\mu_B$ ) |       |       |
|------|----------------------|---------|---------|-----------------------------|-------|-------|
|      | X                    | Y       | Z       | X                           | Y     | Z     |
| Pu A | 0.67692              | 0.67595 | 0.08447 | -2.41                       | -1.37 | -2.61 |
| Pu A | 0.33344              | 0.33343 | 0.17237 | -3.09                       | -1.75 | -1.34 |
| Pu A | 0.00000              | 1.00000 | 0.26522 | -3.07                       | -1.77 | -1.34 |
| Pu A | 0.66656              | 0.66657 | 0.35808 | -3.09                       | -1.75 | -1.34 |
| Pu A | 0.32308              | 0.32405 | 0.44597 | -2.41                       | -1.37 | -2.61 |
| Pu B | 0.67507              | 0.14902 | 0.08242 | -0.26                       | 3.37  | -3.40 |
| Pu B | 0.33358              | 0.83154 | 0.17295 | 0.00                        | 3.53  | -1.39 |
| Pu B | 0.00000              | 0.50000 | 0.26522 | 0.00                        | 3.55  | -1.33 |
| Pu B | 0.66642              | 0.16846 | 0.35750 | 0.00                        | 3.53  | -1.39 |
| Pu B | 0.32493              | 0.85098 | 0.44803 | -0.26                       | 3.37  | -3.40 |
| Pu C | 0.14916              | 0.67458 | 0.08239 | 2.81                        | -1.93 | -3.37 |
| Pu C | 0.83144              | 0.33361 | 0.17295 | 3.06                        | -1.74 | -1.42 |
| Pu C | 0.50000              | 1.00000 | 0.26522 | 3.08                        | -1.78 | -1.33 |
| Pu C | 0.16856              | 0.66639 | 0.35750 | 3.06                        | -1.74 | -1.42 |
| Pu C | 0.85084              | 0.32542 | 0.44805 | 2.81                        | -1.93 | -3.37 |
| Pu D | 0.16699              | 0.16448 | 0.08052 | -0.29                       | -3.64 | 1.10  |
| Pu D | 0.83437              | 0.83432 | 0.17524 | 0.01                        | 0.00  | 3.80  |
| Pu D | 0.50000              | 0.50000 | 0.26522 | -0.01                       | -0.01 | 3.80  |
| Pu D | 0.16563              | 0.16568 | 0.35521 | 0.01                        | 0.00  | 3.80  |
| Pu D | 0.83301              | 0.83552 | 0.44993 | -0.29                       | -3.64 | 1.10  |
| O    | 0.01024              | 0.01023 | 0.05695 |                             |       |       |
| O    | 0.52114              | 0.51717 | 0.02269 |                             |       |       |
| O    | 0.49674              | 0.98681 | 0.05680 |                             |       |       |
| O    | 0.98668              | 0.49659 | 0.05689 |                             |       |       |
| O    | 0.35130              | 0.81118 | 0.10393 |                             |       |       |
| O    | 0.81000              | 0.35166 | 0.10407 |                             |       |       |
| O    | 0.83216              | 0.83194 | 0.10677 |                             |       |       |
| O    | 0.33595              | 0.33560 | 0.10325 |                             |       |       |
| O    | 0.67007              | 0.67021 | 0.15148 |                             |       |       |
| O    | 0.16409              | 0.16396 | 0.14745 |                             |       |       |
| O    | 0.16319              | 0.66887 | 0.15162 |                             |       |       |
| O    | 0.66891              | 0.16294 | 0.15167 |                             |       |       |
| O    | 0.00203              | 0.49568 | 0.19641 |                             |       |       |
| O    | 0.49566              | 0.00200 | 0.19642 |                             |       |       |
| O    | 0.50011              | 0.50011 | 0.19577 |                             |       |       |
| O    | 0.00198              | 0.00191 | 0.19674 |                             |       |       |
| O    | 0.33374              | 0.33375 | 0.24201 |                             |       |       |
| O    | 0.83329              | 0.83330 | 0.24272 |                             |       |       |
| O    | 0.83237              | 0.33388 | 0.24221 |                             |       |       |
| O    | 0.33388              | 0.83237 | 0.24220 |                             |       |       |
| O    | 0.66612              | 0.16763 | 0.28825 |                             |       |       |
| O    | 0.16763              | 0.66612 | 0.28824 |                             |       |       |
| O    | 0.16671              | 0.16670 | 0.28773 |                             |       |       |
| O    | 0.66626              | 0.66625 | 0.28843 |                             |       |       |

|       |         |         |         |
|-------|---------|---------|---------|
| O     | 0.99802 | 0.99809 | 0.33370 |
| O     | 0.49989 | 0.49989 | 0.33468 |
| O     | 0.50434 | 0.99800 | 0.33403 |
| O     | 0.99797 | 0.50432 | 0.33404 |
| O     | 0.33109 | 0.83706 | 0.37878 |
| O     | 0.83681 | 0.33113 | 0.37883 |
| O     | 0.83591 | 0.83604 | 0.38299 |
| O     | 0.32993 | 0.32979 | 0.37897 |
| O     | 0.66405 | 0.66440 | 0.42719 |
| O     | 0.16784 | 0.16806 | 0.42367 |
| O     | 0.19000 | 0.64834 | 0.42637 |
| O     | 0.64870 | 0.18882 | 0.42651 |
| O     | 0.01332 | 0.50341 | 0.47356 |
| O     | 0.50326 | 0.01319 | 0.47365 |
| O     | 0.47886 | 0.48283 | 0.50776 |
| O     | 0.98976 | 0.98977 | 0.47350 |
| O     | 0.44104 | 0.45165 | 0.57537 |
| O     | 0.55896 | 0.54835 | 0.95507 |
| <hr/> |         |         |         |
| C     | 0.45932 | 0.46670 | 0.54180 |
| C     | 0.54068 | 0.53330 | 0.98864 |
